# Supplementary material for: Calculated linear and nonlinear optical absorption spectra of phosphine-ligated gold clusters
Source: Royal Society of Chemistry journal article supplement (doi:10.1039/d2cp01232d), 2022-01-01
Supplement: d2cp01232d1.pdf [file d2cp01232d1.pdf]

# Supplementary Material: Calculated linear and nonlinear optical absorption spectra of phosphine-ligated gold clusters

Paul N. Day,<sup>a,b\*</sup> Ruth Pachter,<sup>a\*</sup> Kiet A. Nguyen<sup>a,b</sup>

<sup>a</sup>Air Force Research Laboratory, Materials and Manufacturing Directorate,  
Wright-Patterson Air Force Base, OH 45433, USA

<sup>b</sup>UES, Inc. Dayton OH 45432, USA

Table S1. Comparison of calculated excited-state energies for  $\text{Au}_8(\text{PR}_3)_7^{2+}$ ,  $\text{R} = \text{Ph}$ , with comparison to the Voigt-function resolved features from the measured H.R. absorption spectrum. The primary orbital transition in our calculations is listed in the last two rows.

|                       |      |      |      |      |      |      |      |      |      |      |      |  | <b>MUE</b>  |
|-----------------------|------|------|------|------|------|------|------|------|------|------|------|--|-------------|
| measured <sup>1</sup> | 2.06 | 2.26 | 2.42 | 2.68 | 2.76 | 2.92 | 3.05 | 3.09 | 3.36 | 3.41 | 3.49 |  |             |
| TD-PBE0               | 2.19 | 2.41 | 2.70 | 2.92 | 2.95 | 3.02 | 3.15 | 3.21 | 3.25 | 3.31 | 3.34 |  | <b>0.15</b> |
| G0W0-PBE0             | 1.90 | 2.12 | 2.45 | 2.65 | 2.70 | 2.76 | 2.89 | 2.95 | 2.96 | 3.01 | 3.11 |  | <b>0.19</b> |
| evGW-PBE0             | 2.08 | 2.29 | 2.63 | 2.82 | 2.87 | 2.94 | 3.07 | 3.12 | 3.13 | 3.18 | 3.28 |  | <b>0.11</b> |
| TD-CAM                | 2.39 | 2.67 | 3.02 | 3.27 | 3.32 | 3.47 | 3.57 | 3.68 | 3.69 | 3.78 | 3.91 |  | <b>0.48</b> |
| G0W0-CAM              | 2.16 | 2.43 | 2.79 | 3.02 | 3.05 | 3.15 | 3.28 | 3.37 | 3.39 | 3.51 | 3.59 |  | <b>0.20</b> |
| evGW-CAM              | 2.13 | 2.41 | 2.77 | 2.99 | 3.02 | 3.13 | 3.26 | 3.35 | 3.37 | 3.49 | 3.57 |  | <b>0.18</b> |
| TD-B3LYP              | 2.10 | 2.32 | 2.61 | 2.82 | 2.85 | 2.90 | 3.01 | 3.07 | 3.14 | 3.14 | 3.17 |  | <b>0.13</b> |
| evGW-B3LYP            | 2.06 | 2.28 | 2.62 | 2.81 | 2.86 | 2.93 | 3.04 | 3.10 | 3.12 | 3.15 | 3.24 |  | <b>0.11</b> |
| TD-PBE                | 1.86 | 1.98 | 2.24 | 2.36 | 2.40 | 2.43 | 2.47 | 2.49 | 2.51 | 2.56 | 2.57 |  | <b>0.51</b> |
| evGW-PBE              | 2.01 | 2.14 | 2.50 | 2.64 | 2.71 | 2.75 | 2.77 | 2.81 | 2.85 | 2.89 | 2.90 |  | <b>0.24</b> |
| Orb. Trans.           | H    | H-1  | H    | H-1  | H    | H    | H    | H-1  | H-1  | H-2  | H-1  |  |             |
|                       | L    | L    | L+1  | L+1  | L+2  | L+3  | L+4  | L+2  | L+2  | L    | L+4  |  |             |

Table S2. Measured and calculated absorption features for  $\text{Au}_9(\text{PR}_3)_8^{3+}$  with R = Ph. Measured data in the solvents methanol (MeOH), acetonitrile (ACN), and dichloromethane (DCM), and in a thin-film of poly(methyl methacrylate) (PMMA). The final section has results for the average of the two structures. The mean-unsigned-error (MUE) is for the first five features, relative to the high-resolution measurement.

|                                          |         |      |      |      |      |      |      |      |      |      |             |
|------------------------------------------|---------|------|------|------|------|------|------|------|------|------|-------------|
| <b>measurement</b>                       | solvent |      |      |      |      |      |      |      |      |      |             |
| High-res. UV-Vis <sup>2</sup>            |         | 2.04 | 2.45 | 2.73 | 2.87 | 3.07 | 3.38 | 3.60 | 3.80 | 3.91 | 4.06        |
| UV-Vis <sup>2</sup>                      | MeOH    | 1.97 | 2.42 |      | 2.80 | 3.00 | 3.26 | 3.53 | 3.75 |      |             |
| UV-Vis <sup>3</sup>                      | ACN     |      |      |      | 2.80 |      | 3.27 | 3.59 |      | 3.95 |             |
| UV-Vis <sup>4</sup>                      | PMMA    | 2.38 | 2.62 |      | 2.79 | 2.99 |      | 3.58 |      |      |             |
| UV-Vis <sup>5</sup>                      | DCM     |      |      |      | 2.81 |      | 3.32 | 3.60 |      | 3.92 |             |
| UV-Vis <sup>5</sup>                      | MeOH    |      |      |      | 2.80 |      | 3.27 | 3.51 |      | 3.92 |             |
| <b>theory: D<sub>2</sub></b>             |         |      |      |      |      |      |      |      |      |      | <b>MUE</b>  |
| TD-LB94 <sup>6</sup>                     |         | 1.66 | 2.21 | 2.47 | 3.10 | 3.37 |      |      |      |      |             |
| TD-GRAC <sup>1</sup>                     |         | 1.57 | 2.27 | 2.43 |      |      |      |      |      |      |             |
| TD-PBE0                                  |         | 1.93 | 2.43 | 2.90 | 3.11 | 3.42 | 3.61 | 3.71 | 3.95 |      | <b>0.18</b> |
| evGW-BSE:PBE0                            |         | 1.82 | 2.31 | 2.79 | 3.00 | 3.33 |      | 3.54 | 3.69 |      | <b>0.16</b> |
| evGW-BSE:CAM                             |         | 1.88 | 2.47 | 2.95 | 3.25 | 3.54 | 3.75 | 3.95 | 4.16 | 4.29 | <b>0.25</b> |
| <b>theory: C<sub>4</sub></b>             |         |      |      |      |      |      |      |      |      |      |             |
| SO-TDDFT <sup>5</sup>                    | DCM     |      |      |      | 2.93 | 3.15 | 3.37 |      |      | 4.21 |             |
| SO-TDDFT <sup>5</sup>                    | MeOH    |      |      |      | 2.93 | 3.15 | 3.37 |      |      | 4.21 |             |
| TD-PBE0                                  |         |      | 2.35 | 2.75 | 2.93 |      | 3.44 | 3.63 | 3.80 | 3.93 |             |
| evGW-BSE:PBE0                            |         |      | 2.27 | 2.65 | 2.83 |      | 3.34 |      |      | 3.81 |             |
| evGW-BSE:CAM                             |         |      | 2.30 | 2.68 | 2.89 |      | 3.41 | 3.64 | 3.77 | 3.98 |             |
| <b>Ave.(D<sub>2</sub>-C<sub>4</sub>)</b> |         |      |      |      |      |      |      |      |      |      | <b>MUE</b>  |
| TD-PBE0                                  |         | 1.93 | 2.43 | 2.75 | 2.93 | 3.11 | 3.43 | 3.61 | 3.71 | 3.94 | <b>0.05</b> |
| evGW-BSE:PBE0                            |         | 1.82 | 2.30 | 2.65 | 2.83 | 3.00 | 3.34 | 3.54 | 3.69 | 3.78 | <b>0.11</b> |
| evGW-BSE:CAM                             |         | 1.88 | 2.47 | 2.68 | 2.90 | 3.25 | 3.42 | 3.64 | 3.74 | 3.95 | <b>0.09</b> |

Table S3. Comparison of calculated excited-state energies for  $\text{Au}_9(\text{PR}_3)_8^{3+}$ ,  $\text{R} = \text{Ph}$ , with comparison to the Voigt-function resolved features<sup>1</sup> from the measured H.R. absorption spectrum.

|                          |      |      |      |      |      |      |      |      |      |      |      |  | <b>MUE</b>  |
|--------------------------|------|------|------|------|------|------|------|------|------|------|------|--|-------------|
| measured <sup>1</sup>    | 2.06 | 2.44 | 2.50 | 2.68 | 2.75 | 2.86 | 2.90 | 3.08 | 3.17 | 3.34 | 3.39 |  |             |
| TD-PBE0,D <sub>2</sub>   | 1.93 | 2.20 | 2.43 | 2.73 | 2.90 | 3.08 | 3.11 | 3.17 | 3.21 | 3.30 | 3.34 |  | <b>0.12</b> |
| evGW:PBE0,D <sub>2</sub> | 1.82 | 2.13 | 2.30 | 2.63 | 2.79 | 2.96 | 3.00 | 3.06 | 3.09 | 3.19 | 3.21 |  | <b>0.13</b> |
| TD-PBE0,C <sub>4</sub>   | 2.35 | 2.35 | 2.75 | 2.75 | 2.93 | 2.93 | 3.34 | 3.34 | 3.39 | 3.43 | 3.43 |  | <b>0.18</b> |
| evGW:PBE0,C <sub>4</sub> | 2.27 | 2.27 | 2.65 | 2.65 | 2.83 | 2.83 | 3.25 | 3.25 | 3.28 | 3.34 | 3.34 |  | <b>0.12</b> |

Table S4. Orbital and transition energies (eV) for the first singlet excited state, S1. The vertical absorption (V.A.) energy is the energy difference between the S0 and S1 states at the S0-optimized geometry, the vertical emission (V.E.) energy is the difference at the S1-optimized geometry, and  $\Delta E$  is the difference between the minima. H-L denotes the HOMO-LUMO gap. For the Au<sub>9</sub> systems, results are for the D<sub>2</sub> isomer. Hammett parameters for the ligand substituents and calculated Mulliken charges (M.C.) on the central gold atom are also given.

| Au <sub>9</sub> (PR <sub>3</sub> ) <sub>8</sub> <sup>3+</sup> | R = Ph  | R = PhCH <sub>3</sub> | R = PhOCH <sub>3</sub> | R = PhNH <sub>2</sub> | R = PhNO <sub>2</sub> |
|---------------------------------------------------------------|---------|-----------------------|------------------------|-----------------------|-----------------------|
| Hammett                                                       | 0.000   | -0.170                | -0.268                 | -0.660                | 0.778                 |
| M.C. Au(1)                                                    | -1.681  | -1.687                | -1.789                 | -1.759                | -1.955                |
| HOMO                                                          | -10.410 | -9.978                | -9.690                 | -9.114                | -12.316               |
| LUMO                                                          | -7.640  | -7.232                | -6.996                 | -6.411                | -9.537                |
| H-L                                                           | 2.770   | 2.746                 | 2.694                  | 2.703                 | 2.779                 |
| TDDFT:ver.Abs.                                                | 1.931   | 1.907                 | 1.869                  | 1.917                 | 1.951                 |
| TDDFT:DE                                                      | 1.595   |                       |                        |                       |                       |
| TDDFT:ver.emit                                                | 1.222   |                       |                        |                       |                       |
| HOMO(evGW)                                                    | -10.580 | -10.130               | -9.850                 | -9.357                |                       |
| LUMO(evGW)                                                    | -6.470  | -6.100                | -5.880                 | -5.268                |                       |
| H-L (evGW)                                                    | 4.110   | 4.030                 | 3.970                  | 4.089                 |                       |
| evGW-BSE:ver.Abs.                                             | 1.820   | 1.804                 | 1.790                  | 1.935                 |                       |
| measured                                                      | 2.037   | 1.927                 | 1.829                  |                       |                       |
|                                                               |         |                       |                        |                       |                       |
| Au <sub>8</sub> (PR <sub>3</sub> ) <sub>7</sub> <sup>2+</sup> | R = Ph  | R = PhCH <sub>3</sub> | R = PhOCH <sub>3</sub> |                       |                       |
| Hammett                                                       | 0.000   | -0.170                | -0.268                 |                       |                       |
| M.C. Au(1)                                                    | -1.399  | -1.446                | -1.723                 |                       |                       |
| HOMO                                                          | -8.471  | -8.099                | -7.955                 |                       |                       |
| LUMO                                                          | -5.464  | -5.092                | -5.007                 |                       |                       |
| H-L                                                           | 3.007   | 3.007                 | 2.948                  |                       |                       |
| TDDFT:ver.Abs.                                                | 2.188   | 2.193                 | 2.132                  |                       |                       |
| TDDFT:DE                                                      | 1.697   |                       |                        |                       |                       |
| TDDFT:ver.emit                                                | 0.820   |                       |                        |                       |                       |
| HOMO(evGW)                                                    | -8.610  | -8.270                | -8.130                 |                       |                       |
| LUMO(evGW)                                                    | -3.950  | -3.900                | -3.850                 |                       |                       |
| H-L (evGW)                                                    | 4.660   | 4.370                 | 4.280                  |                       |                       |
| evGW-BSE:ver.Abs.                                             | 2.076   | 2.092                 | 2.013                  |                       |                       |
| measured                                                      | 2.068   | 2.010                 | 1.961                  |                       |                       |

Table S5. For the D<sub>2</sub> isomer of Au<sub>9</sub>(PR<sub>3</sub>)<sub>8</sub><sup>3+</sup>, TD-PBE0 transition energies in eV ( $\Delta E$ ), oscillator strengths (O.S.), and the initial and final orbitals for the primary contribution to the excitation. The superatom character of the orbital is indicated where identified.

|    | R=Ph       | R=Ph   | R=Ph                   | R=Ph                                             | R=PhOMe    | R=PhOMe | R=PhOMe                | R=PhOMe                                          |
|----|------------|--------|------------------------|--------------------------------------------------|------------|---------|------------------------|--------------------------------------------------|
|    | $\Delta E$ | O.S.   | init.orb.              | fin.orb.                                         | $\Delta E$ | O.S.    | init.orb.              | fin.orb.                                         |
| 1  | 1.9314     | 0.0375 | HOMO (P <sub>y</sub> ) | LUMO (D <sub>x<sup>2</sup>-y<sup>2</sup></sub> ) | 1.8686     | 0.0345  | HOMO (P <sub>y</sub> ) | LUMO (D <sub>x<sup>2</sup>-y<sup>2</sup></sub> ) |
| 2  | 2.2040     | 0.0000 | HOMO (P <sub>y</sub> ) | L+1 (P <sub>z</sub> )                            | 2.1527     | 0.0000  | HOMO (P <sub>y</sub> ) | L+1 (P <sub>z</sub> )                            |
| 3  | 2.4261     | 0.0040 | H-1 (P <sub>x</sub> )  | LUMO (D <sub>x<sup>2</sup>-y<sup>2</sup></sub> ) | 2.3589     | 0.0023  | H-1 (P <sub>x</sub> )  | LUMO (D <sub>x<sup>2</sup>-y<sup>2</sup></sub> ) |
| 4  | 2.7268     | 0.0006 | H-1 (P <sub>x</sub> )  | L+1 (P <sub>z</sub> )                            | 2.6658     | 0.0009  | H-1 (P <sub>x</sub> )  | L+1 (P <sub>z</sub> )                            |
| 5  | 2.9038     | 0.0160 | HOMO (P <sub>y</sub> ) | L+2 (D <sub>xy</sub> )                           | 2.7600     | 0.0047  | H-2                    | LUMO (D <sub>x<sup>2</sup>-y<sup>2</sup></sub> ) |
| 6  | 3.0753     | 0.0000 | HOMO (P <sub>y</sub> ) | L+3 (F)                                          | 2.9470     | 0.2549  | HOMO (P <sub>y</sub> ) | L+2 (D <sub>xy</sub> )                           |
| 7  | 3.1110     | 0.2990 | H-2                    | LUMO (D <sub>x<sup>2</sup>-y<sup>2</sup></sub> ) | 2.9737     | 0.0018  | H-4                    | LUMO (D <sub>x<sup>2</sup>-y<sup>2</sup></sub> ) |
| 8  | 3.1690     | 0.0025 | HOMO (P <sub>y</sub> ) | L+4 (D <sub>yz</sub> )                           | 3.0138     | 0.0000  | H-3                    | LUMO (D <sub>x<sup>2</sup>-y<sup>2</sup></sub> ) |
| 9  | 3.2070     | 0.0088 | H-3                    | LUMO (D <sub>x<sup>2</sup>-y<sup>2</sup></sub> ) | 3.0149     | 0.0000  | HOMO (P <sub>y</sub> ) | L+3 (F)                                          |
| 10 | 3.3048     | 0.0000 | H-2                    | L+1 (P <sub>z</sub> )                            | 3.0409     | 0.0001  | H-5                    | LUMO (D <sub>x<sup>2</sup>-y<sup>2</sup></sub> ) |
| 11 | 3.3413     | 0.0000 | H-5                    | LUMO (D <sub>x<sup>2</sup>-y<sup>2</sup></sub> ) | 3.0884     | 0.0028  | HOMO (P <sub>y</sub> ) | L+4 (D <sub>yz</sub> )                           |
| 12 | 3.3498     | 0.0000 | H-4                    | LUMO (D <sub>x<sup>2</sup>-y<sup>2</sup></sub> ) | 3.1082     | 0.0016  | H-2                    | L+1 (P <sub>z</sub> )                            |
| 13 | 3.4219     | 0.0479 | H-1 (P <sub>x</sub> )  | L+2 (D <sub>xy</sub> )                           | 3.1809     | 0.0000  | H-6                    | LUMO (D <sub>x<sup>2</sup>-y<sup>2</sup></sub> ) |
| 14 | 3.4999     | 0.0000 | H-3                    | L+1 (P <sub>z</sub> )                            | 3.2230     | 0.0092  | H-7                    | LUMO (D <sub>x<sup>2</sup>-y<sup>2</sup></sub> ) |
| 15 | 3.5364     | 0.0001 | HOMO (P <sub>y</sub> ) | L+5                                              | 3.2816     | 0.0000  | H-4                    | L+1 (P <sub>z</sub> )                            |
| 16 | 3.5485     | 0.0000 | H-6                    | LUMO (D <sub>x<sup>2</sup>-y<sup>2</sup></sub> ) | 3.3297     | 0.0646  | H-1 (P <sub>x</sub> )  | L+2 (D <sub>xy</sub> )                           |
| 17 | 3.5575     | 0.0003 | H-1 (P <sub>x</sub> )  | L+3 (F)                                          | 3.3583     | 0.1610  | H-3                    | L+1 (P <sub>z</sub> )                            |

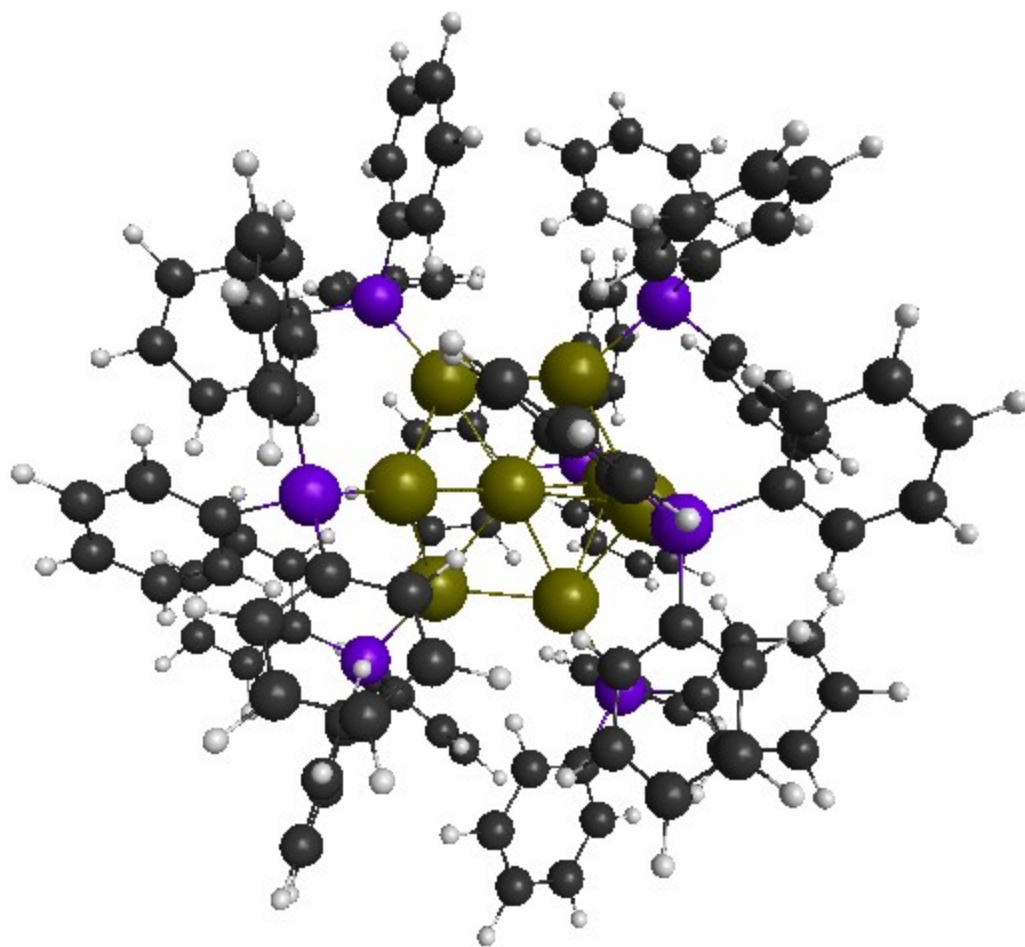

a)  $\text{Au}_8(\text{PR}_3)_7^{2+}$ , R=Ph

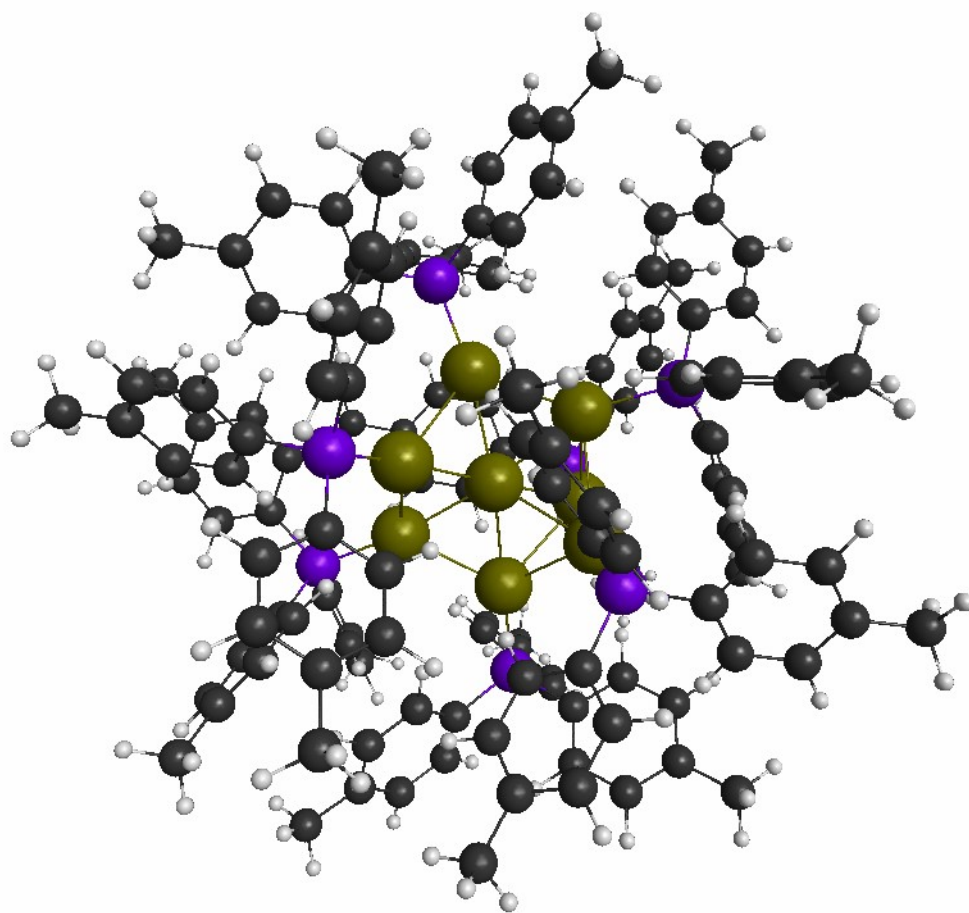

b)  $\text{Au}_8(\text{PR}_3)_7^{2+}$ , R=PhMe



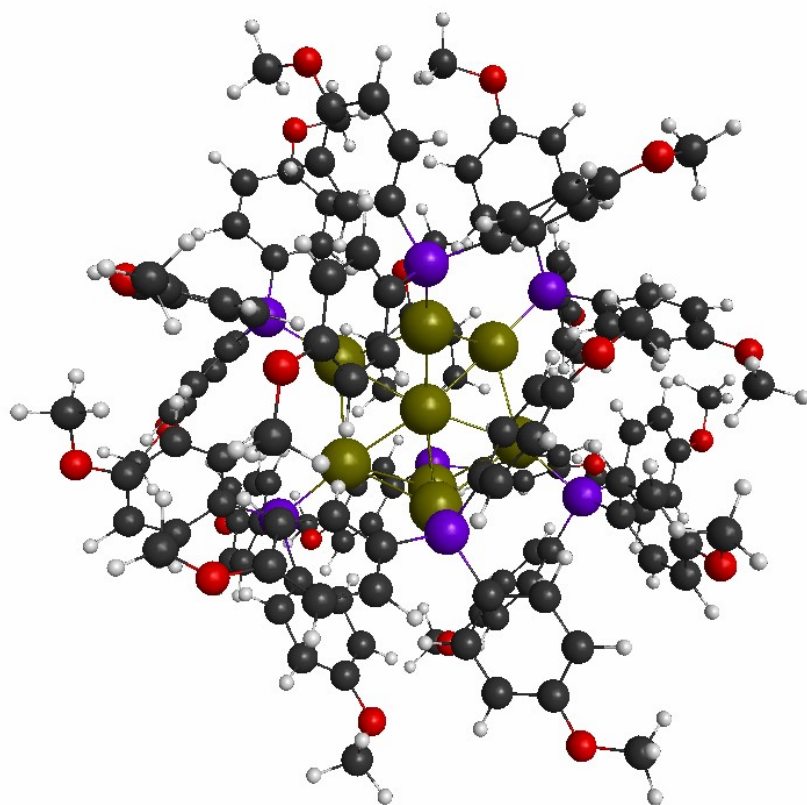

c)  $\text{Au}_8(\text{PR}_3)_7^{2+}$ , R=PhOMe

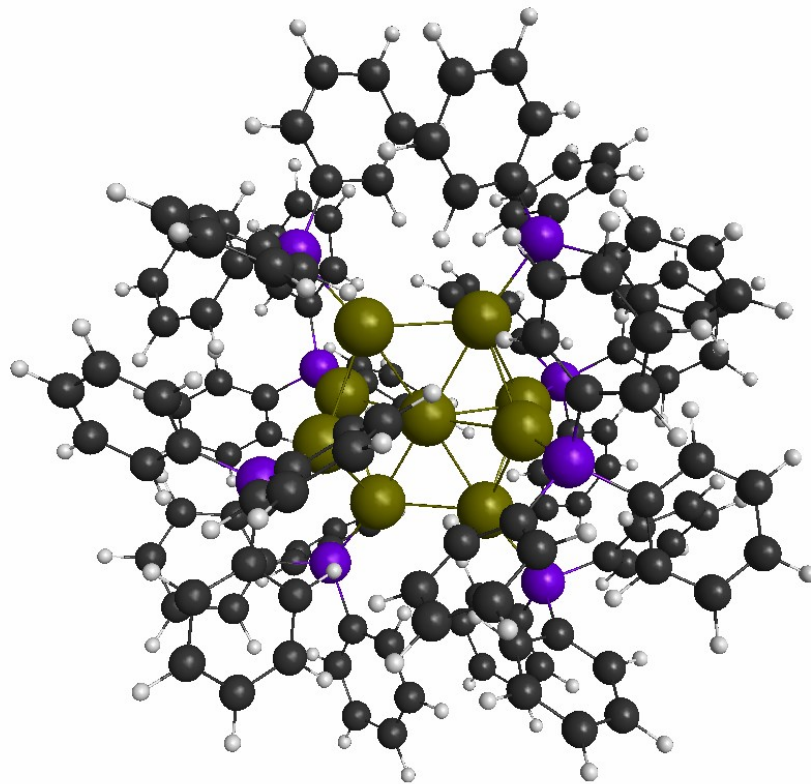

d)  $D_2 \text{ Au}_9(\text{PR}_3)_8^{3+}$ , R=Ph

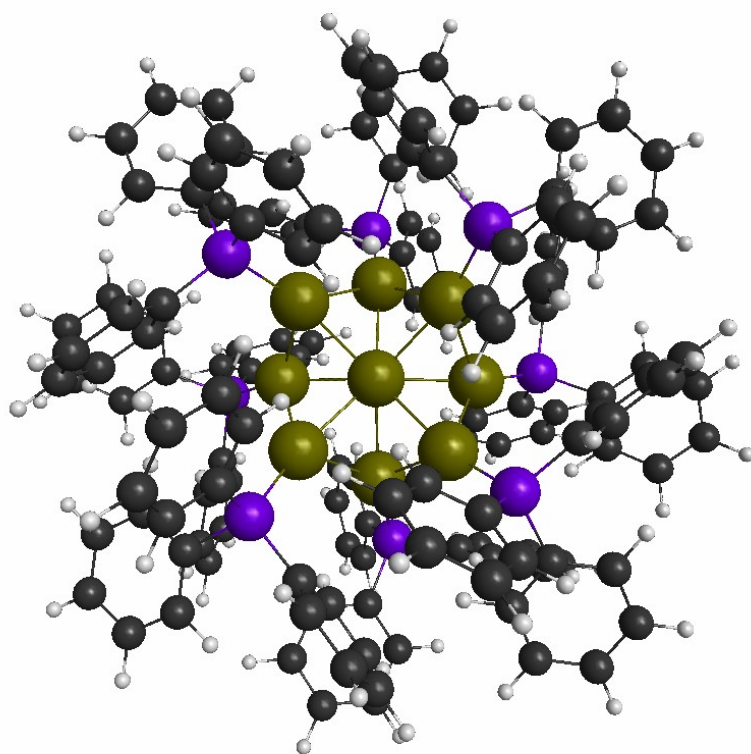

e)  $C_4 Au_9(PR_3)_8^{3+}$ , R=Ph

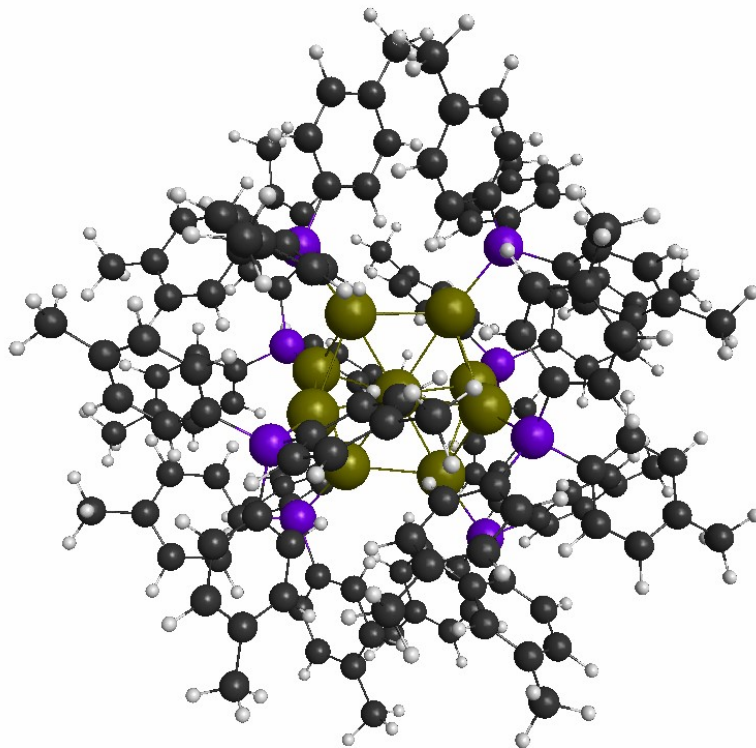

f)  $D_2 \text{ Au}_9(\text{PR}_3)_8^{3+}$ , R=PhMe

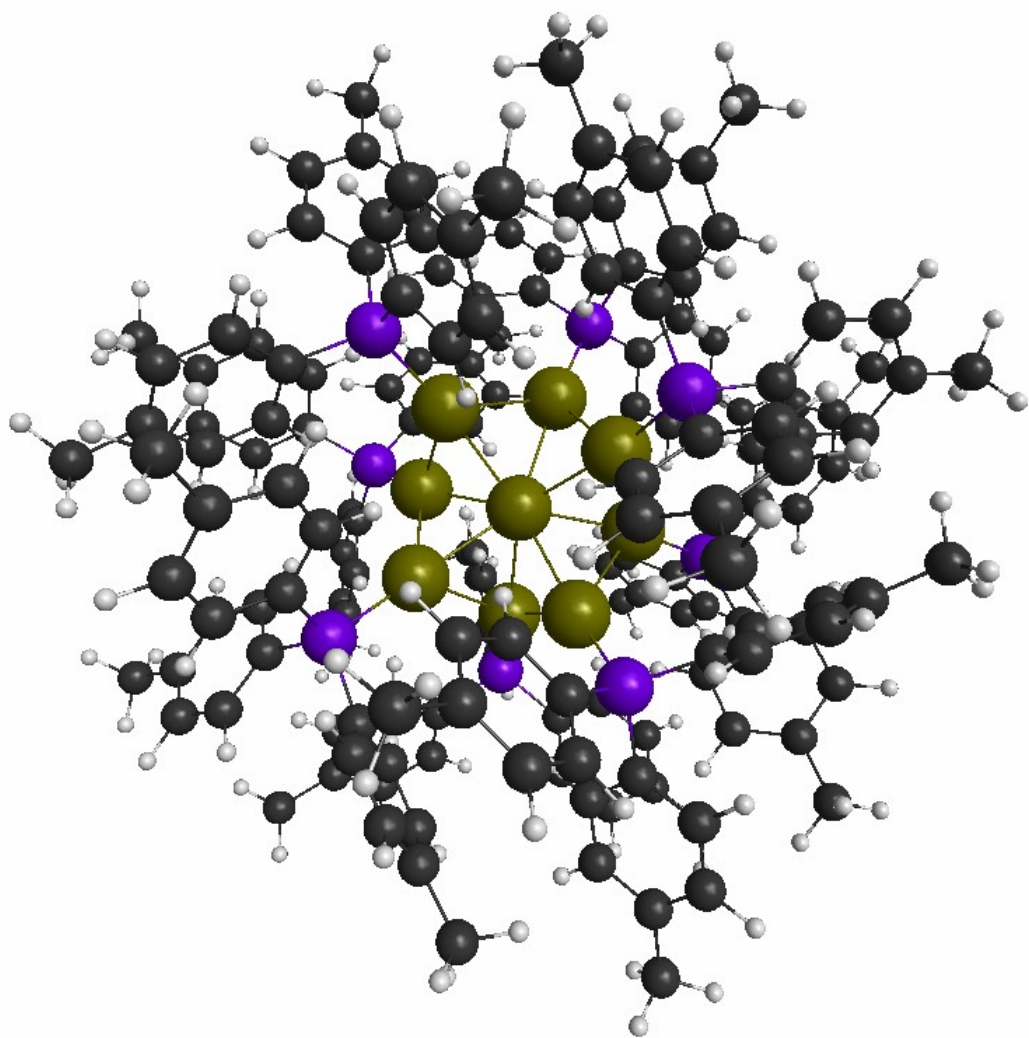

g)  $C_4 Au_9(PR_3)_8^{3+}$ , R=PhMe

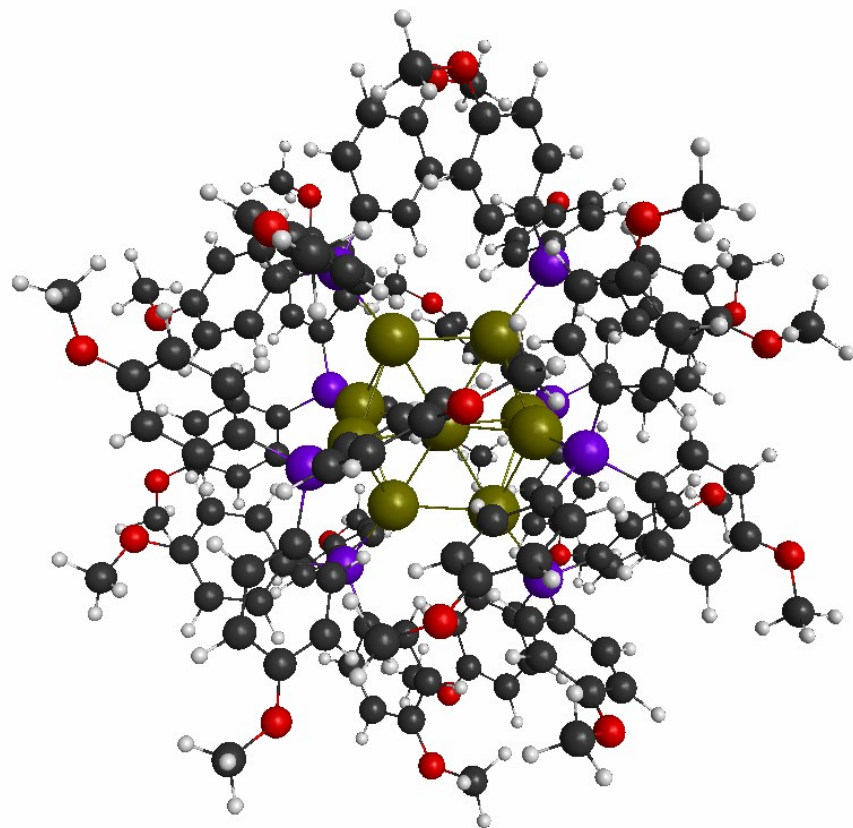

h)  $D_2 \text{ Au}_9(\text{PR}_3)_8^{3+}$ , R=PhOMe

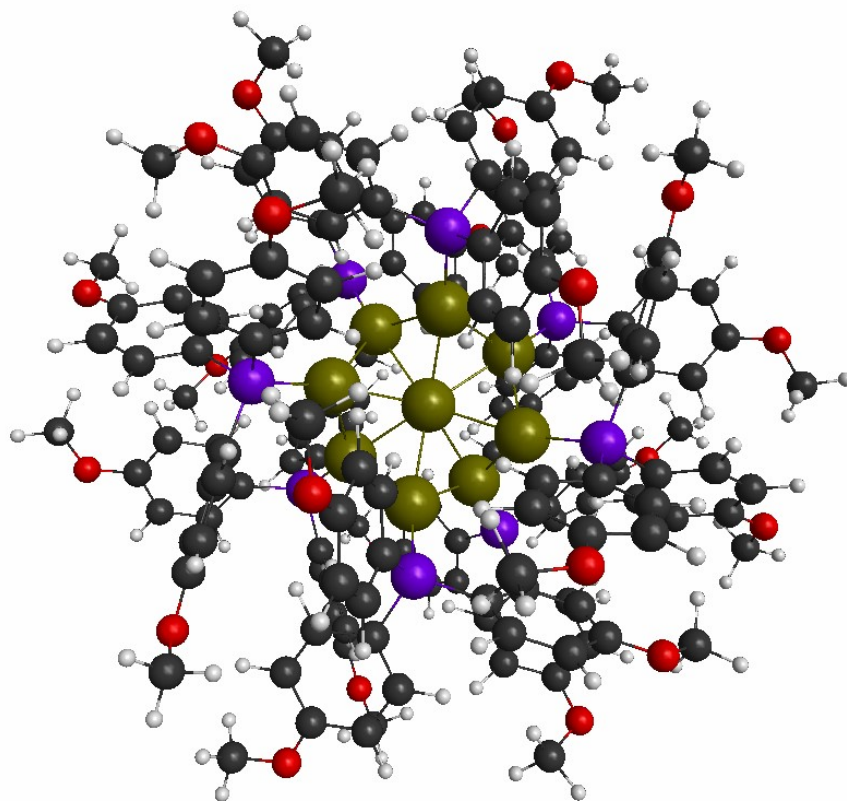

i)  $C_4 Au_9(PR_3)_8^{3+}$ , R=PhOMe

Figure S1. Structure of clusters studied.

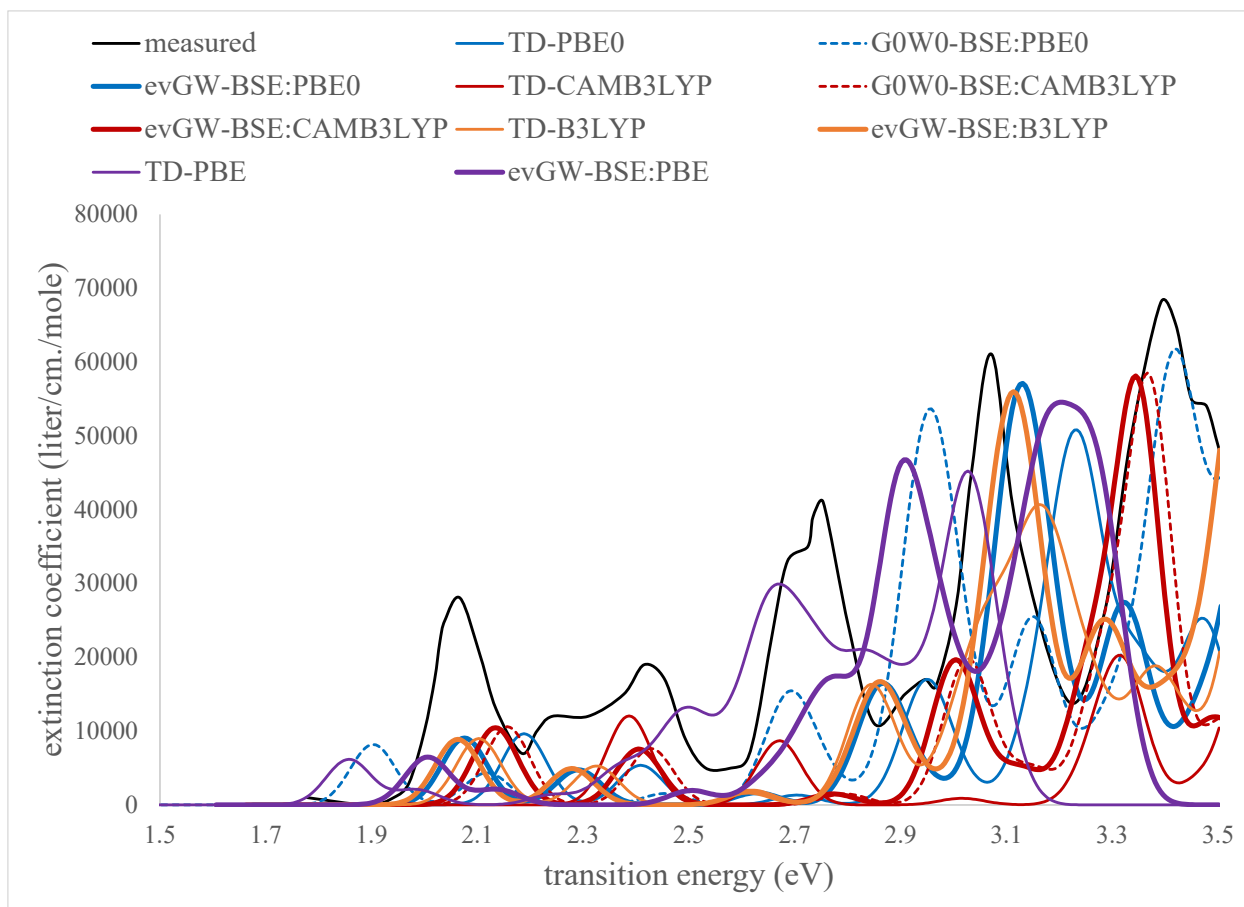

Figure S2. OPA calculated for  $\text{Au}_8(\text{PR}_3)_7^{2+}$  when  $\text{R} = \text{Ph}$  at a geometry optimized with PBE0-D3, with comparison to experiment.<sup>2</sup> The extinction coefficients were calculated by fitting the calculated oscillator strengths to Gaussian functions with FWHM = 0.1 eV. The absolute intensity of the experimental spectra is arbitrary.



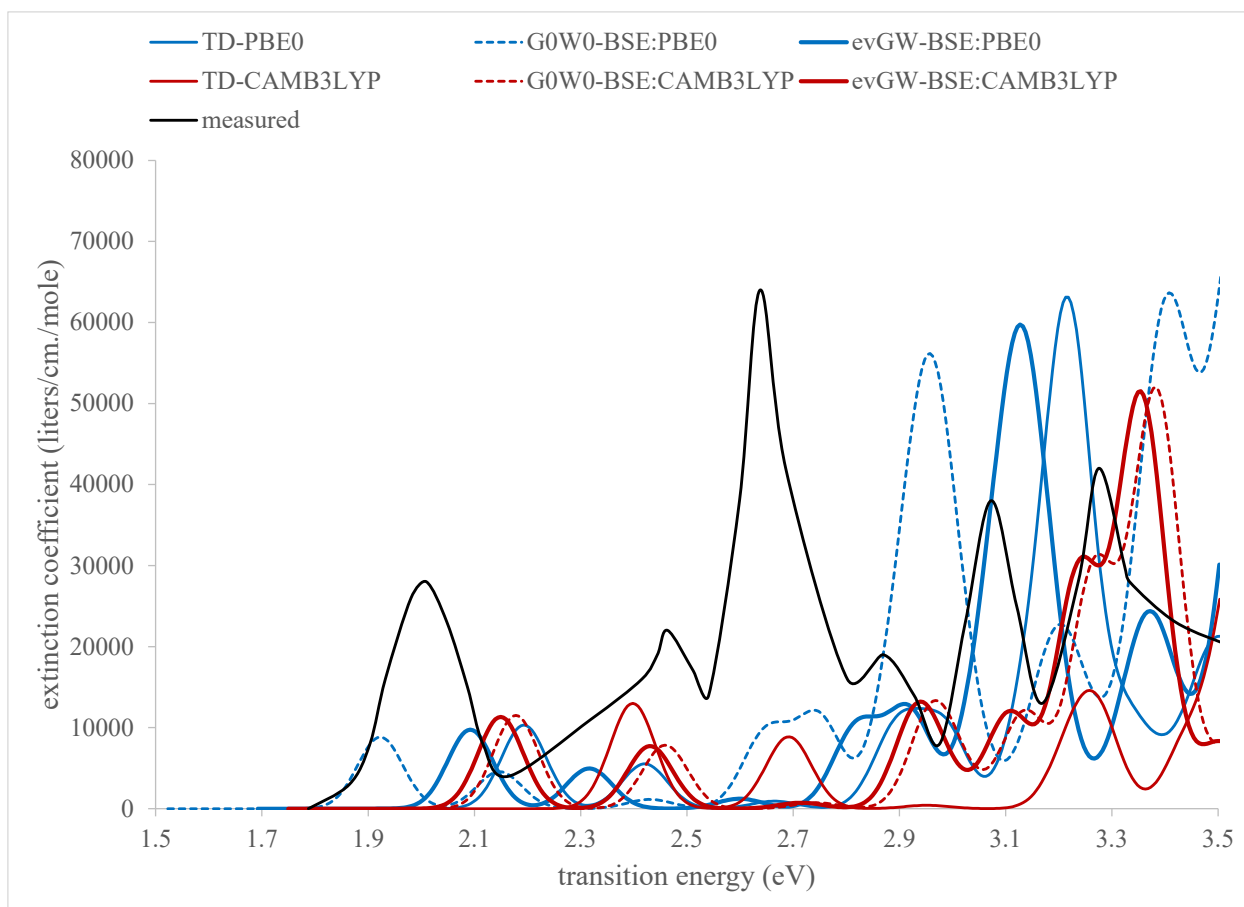

Figure S3. OPA calculated for  $\text{Au}_8(\text{PR}_3)_7^{2+}$  when  $\text{R} = \text{PhMe}$  at a geometry optimized with PBE0-D3, with comparison to experiment.<sup>2</sup> The extinction coefficients were calculated by fitting the calculated oscillator strengths to Gaussian functions with FWHM = 0.1 eV. The absolute intensity of the experimental spectra is arbitrary.

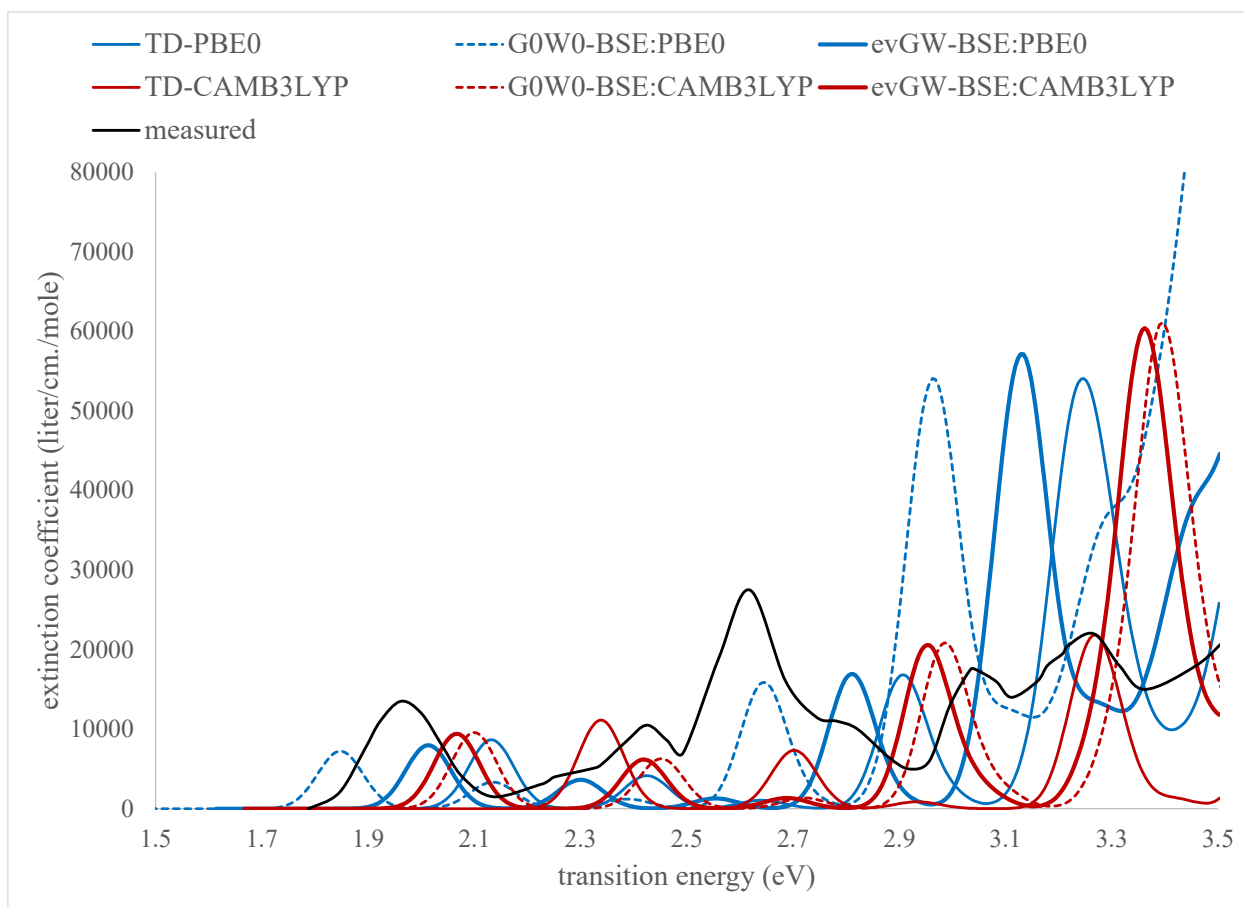

Figure S4. OPA calculated for  $\text{Au}_8(\text{PR}_3)_7^{2+}$  when  $\text{R} = \text{PhOMe}$  at a geometry optimized with PBE0-D3, with comparison to experiment.<sup>2</sup> The extinction coefficients were calculated by fitting the calculated oscillator strengths to Gaussian functions with FWHM = 0.1 eV. The absolute intensity of the experimental spectra is arbitrary.

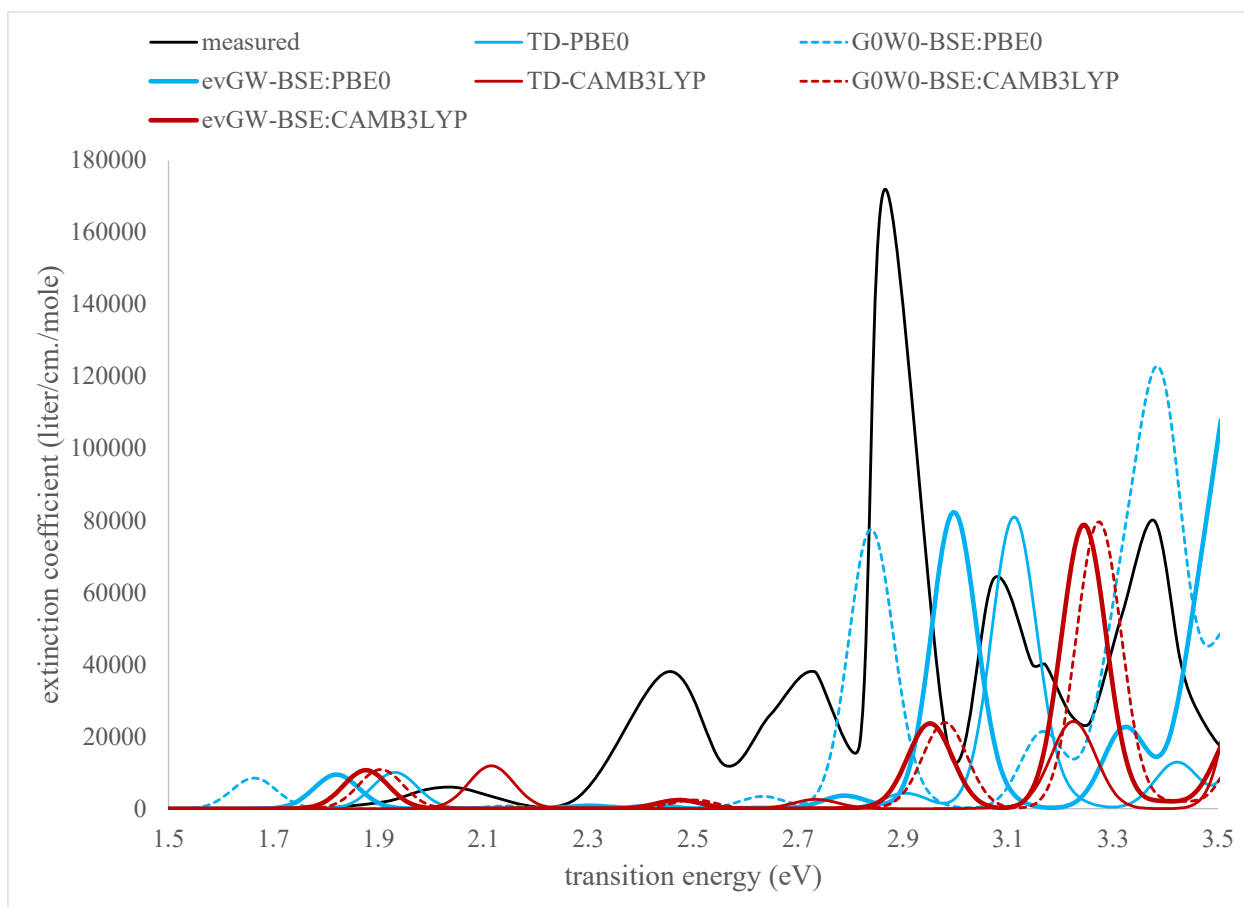

Figure S5. OPA calculated for  $D_2 Au_9(PR_3)_8^{3+}$  when  $R = Ph$  at a geometry optimized with PBE0-D3, with comparison to experiment.<sup>2</sup> The extinction coefficients were calculated by fitting the calculated oscillator strengths to Gaussian functions with FWHM = 0.1 eV. The absolute intensity of the experimental spectra is arbitrary.

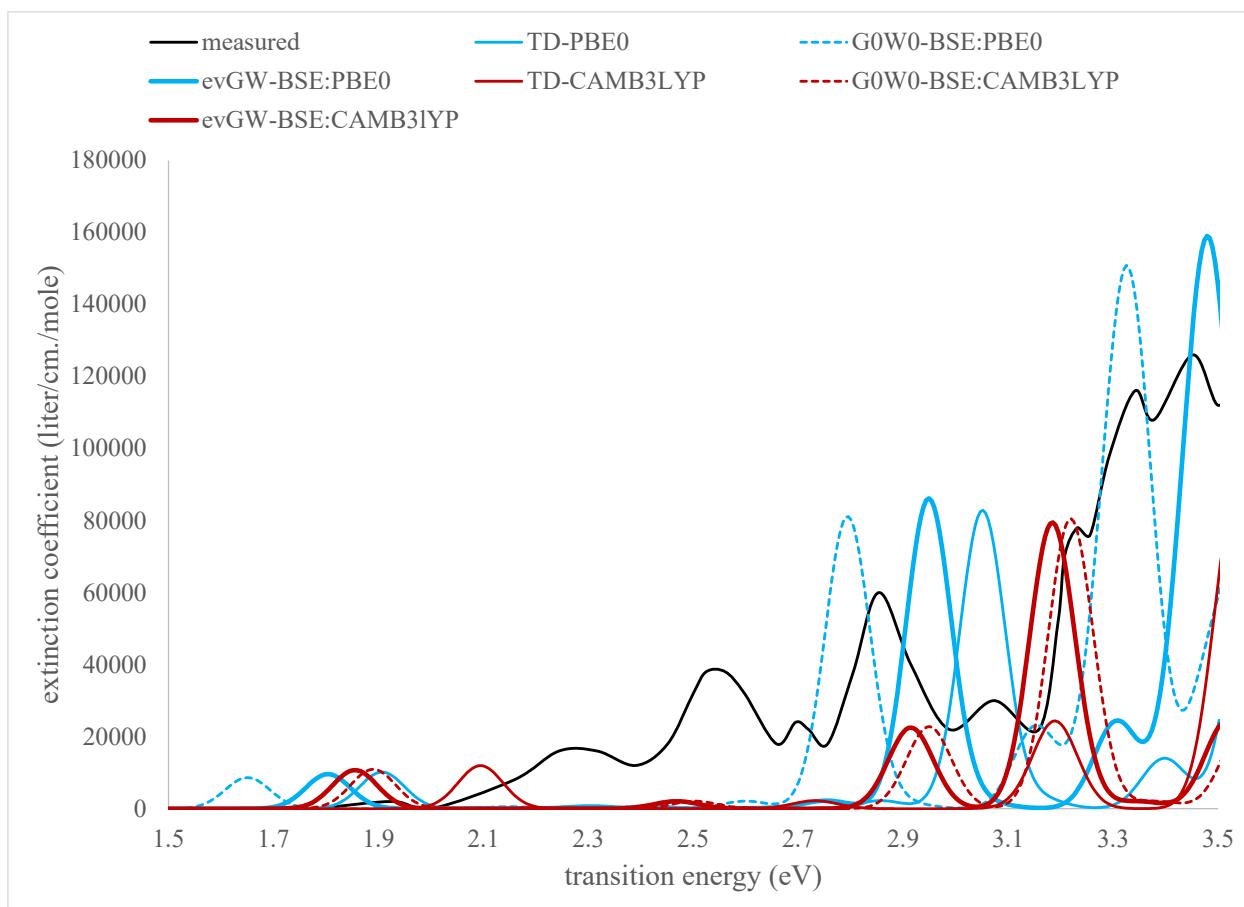

Figure S6. OPA calculated for  $D_2 Au_9(PR_3)_8^{3+}$  when  $R = PhMe$  at a geometry optimized with PBE0-D3, with comparison to experiment.<sup>2</sup> The extinction coefficients were calculated by fitting the calculated oscillator strengths to Gaussian functions with FWHM = 0.1 eV. The absolute intensity of the experimental spectra is arbitrary.

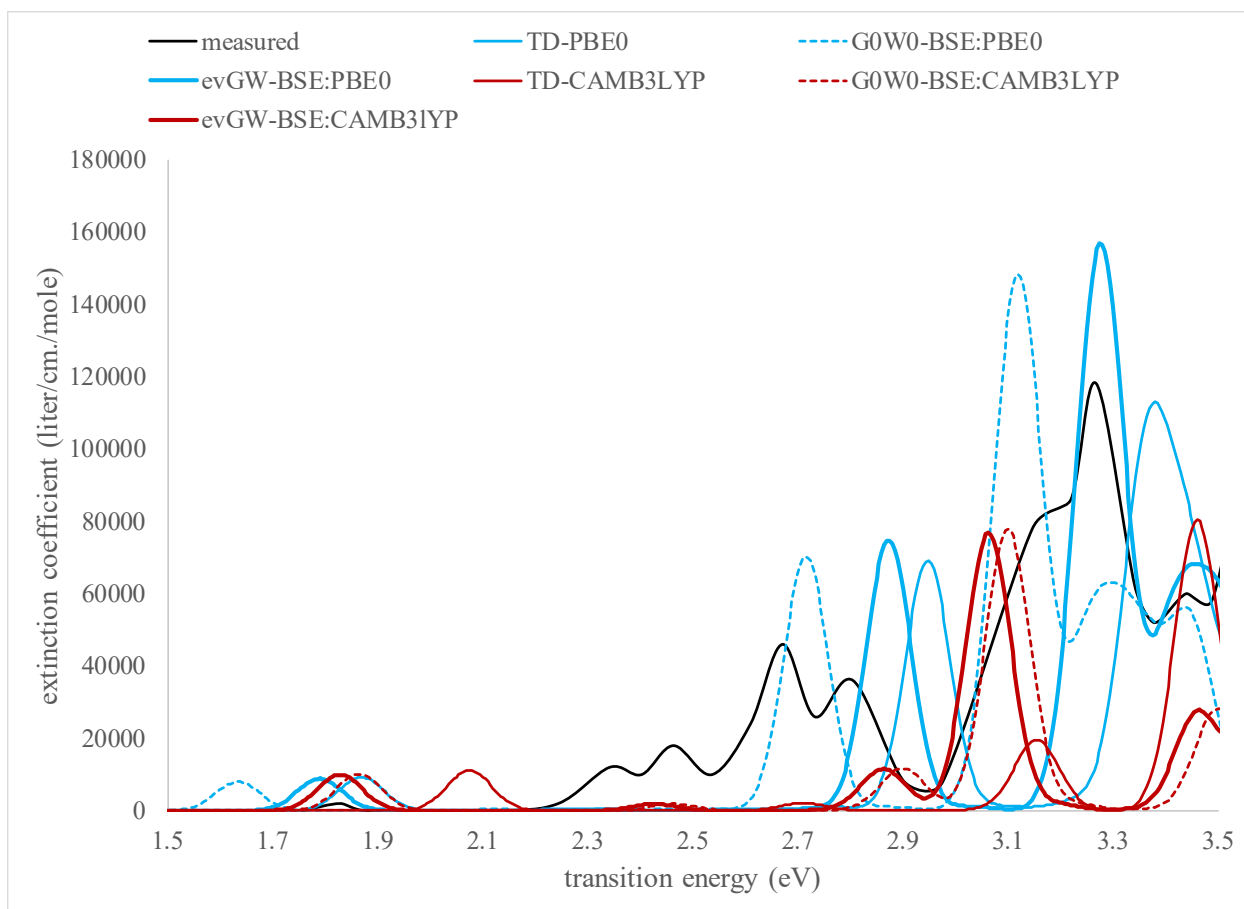

Figure S7. OPA calculated for  $D_2 Au_9(PR_3)_8^{3+}$  when R = PhOMe at a geometry optimized with PBE0-D3, with comparison to experiment.<sup>2</sup> The extinction coefficients were calculated by fitting the calculated oscillator strengths to Gaussian functions with FWHM = 0.1 eV. The absolute intensity of the experimental spectra is arbitrary.

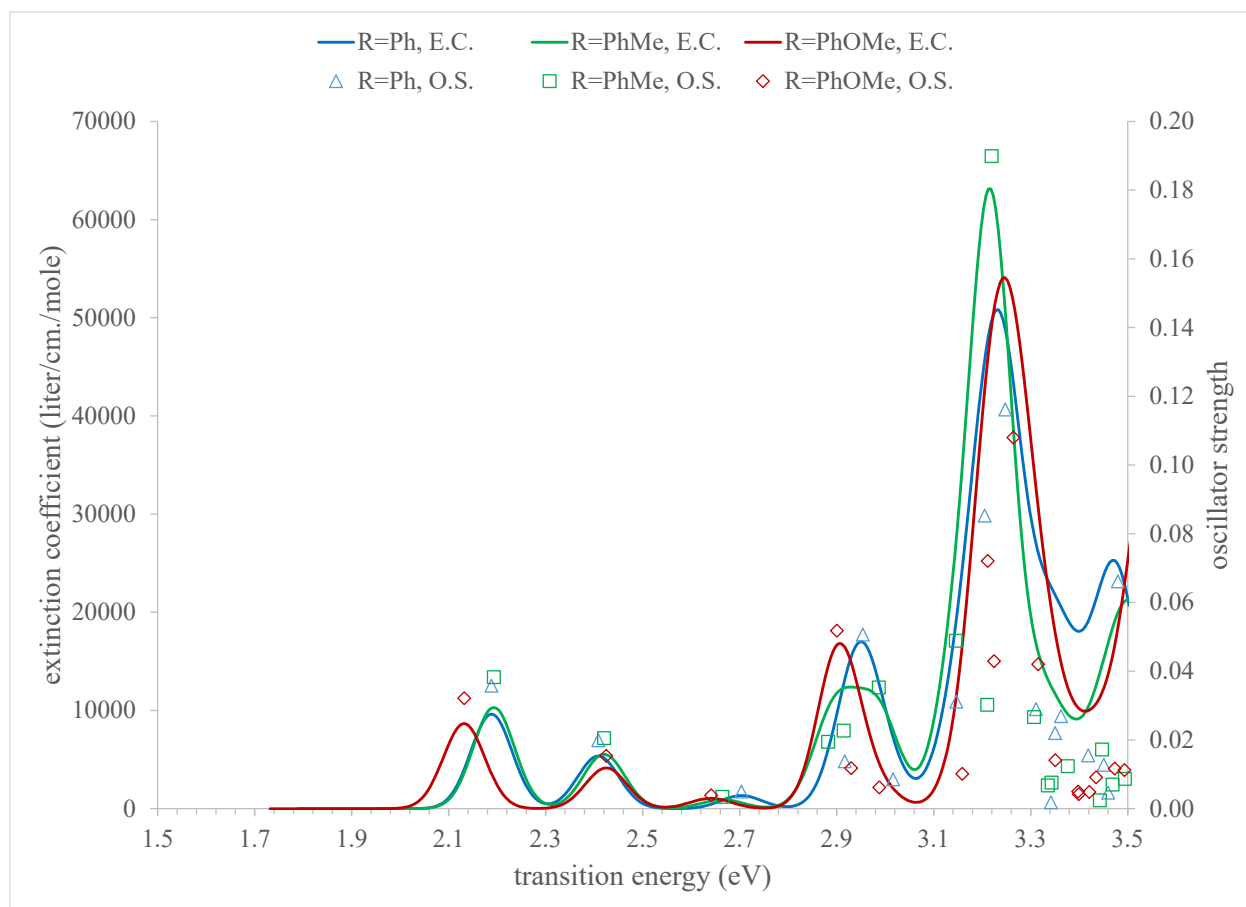

Figure S8. The effects of the ligands on the OPA of  $\text{Au}_8(\text{PR}_3)_7^{2+}$  calculated using TD-PBE0. The oscillator strengths (O.S.) are plotted against the right vertical axis, while extinction coefficients (E.C.) were obtained by fitting to Gaussian linewidth functions with full-width at half-maximum of 0.1 eV.

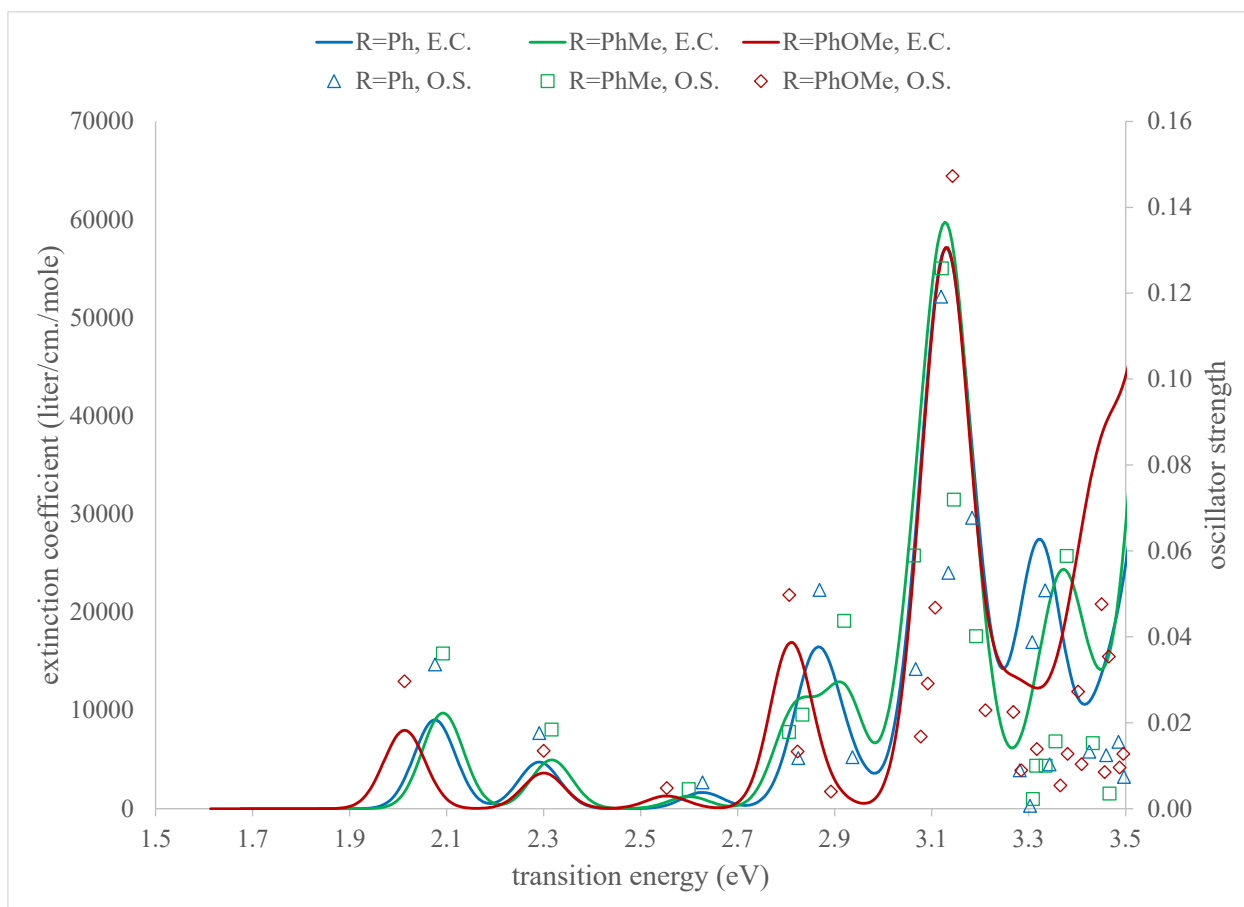

Figure S9. The effects of the ligands on the OPA of  $\text{Au}_8(\text{PR}_3)_7^{2+}$  calculated using evGW-BSE:PBE0. The oscillator strengths (O.S.) are plotted against the right vertical axis, while extinction coefficients (E.C.) were obtained by fitting to Gaussian linewidth functions with full-width at half-maximum of 0.1 eV.

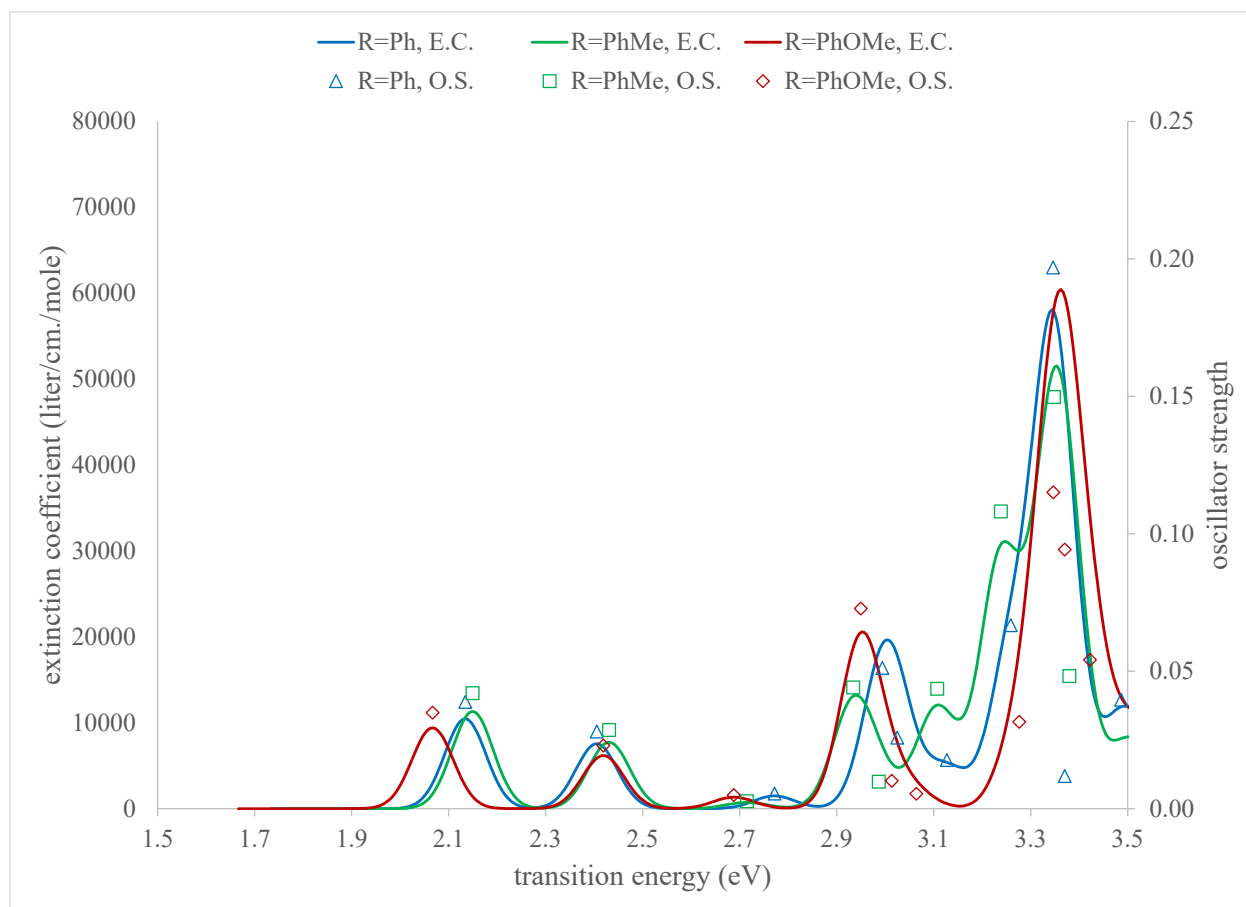

Figure S10. The effects of the ligands on the OPA of  $\text{Au}_8(\text{PR}_3)_7^{2+}$  calculated using evGW-BSE:CAMB3LYP. The oscillator strengths (O.S.) are plotted against the right vertical axis, while extinction coefficients (E.C.) were obtained by fitting to Gaussian linewidth functions with full-width at half-maximum of 0.1 eV.



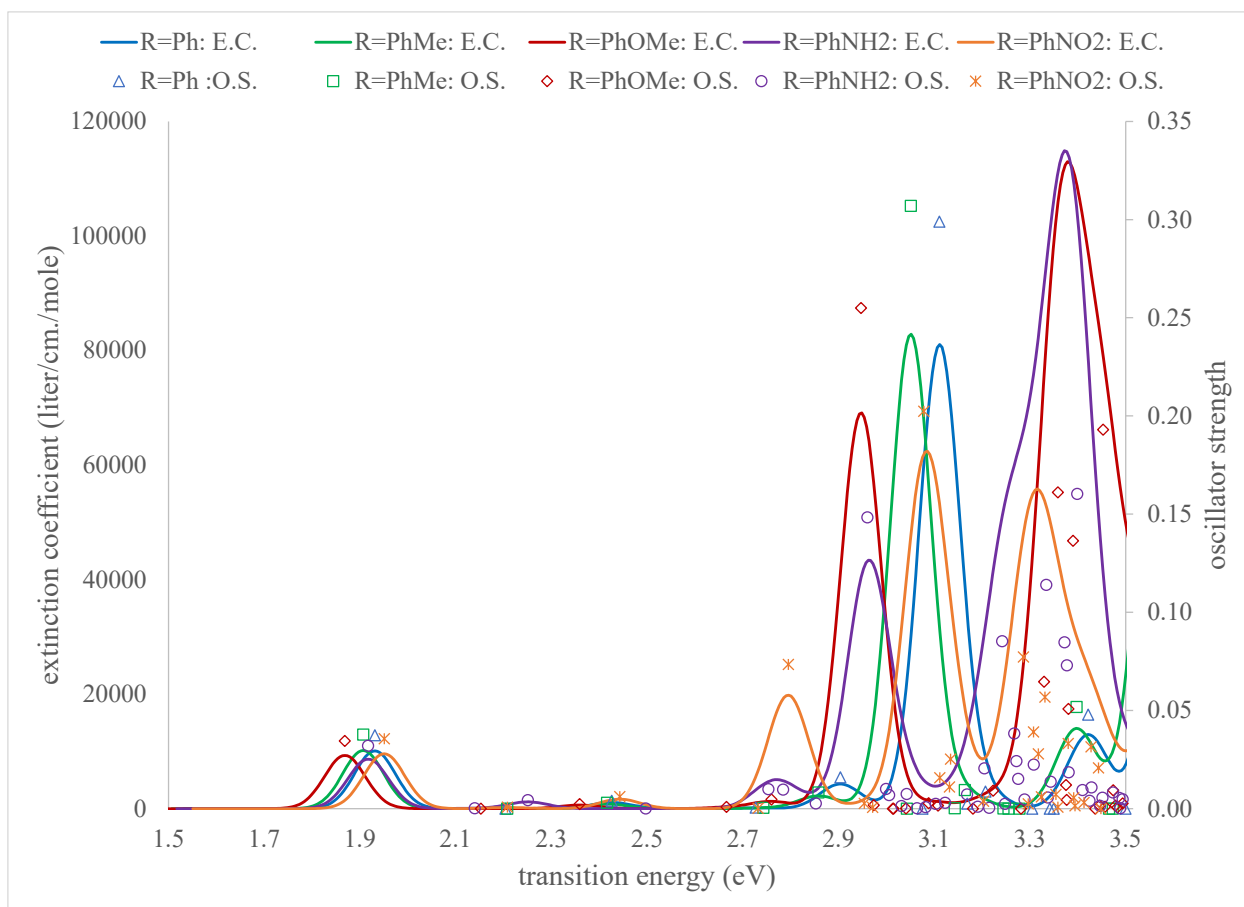

Figure S11. The effects of the ligands on the OPA of  $D_2 Au_9(PR_3)_8^{3+}$  calculated using TD-PBE0. The oscillator strengths (O.S.) are plotted against the right vertical axis, while extinction coefficients (E.C.) were obtained by fitting to Gaussian linewidth functions with full-width at half-maximum of 0.1 eV.

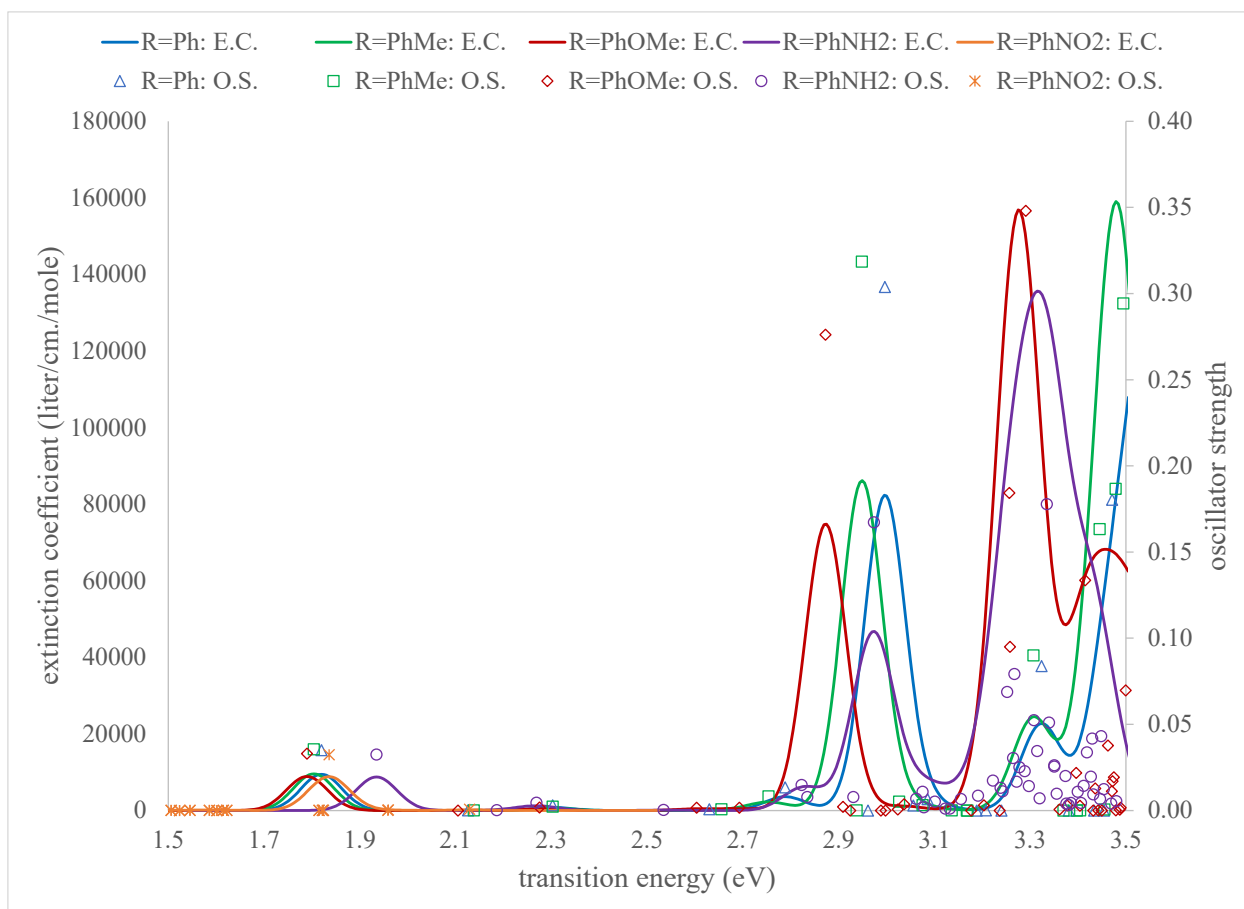

Figure S12. The effects of the ligands on the OPA of  $D_2 Au_9(PR_3)_8^{3+}$  calculated using evGW-BSE:PBE0. The oscillator strengths (O.S.) are plotted against the right vertical axis, while extinction coefficients (E.C.) were obtained by fitting to Gaussian linewidth functions with full-width at half-maximum (FWHM) of 0.1 eV.

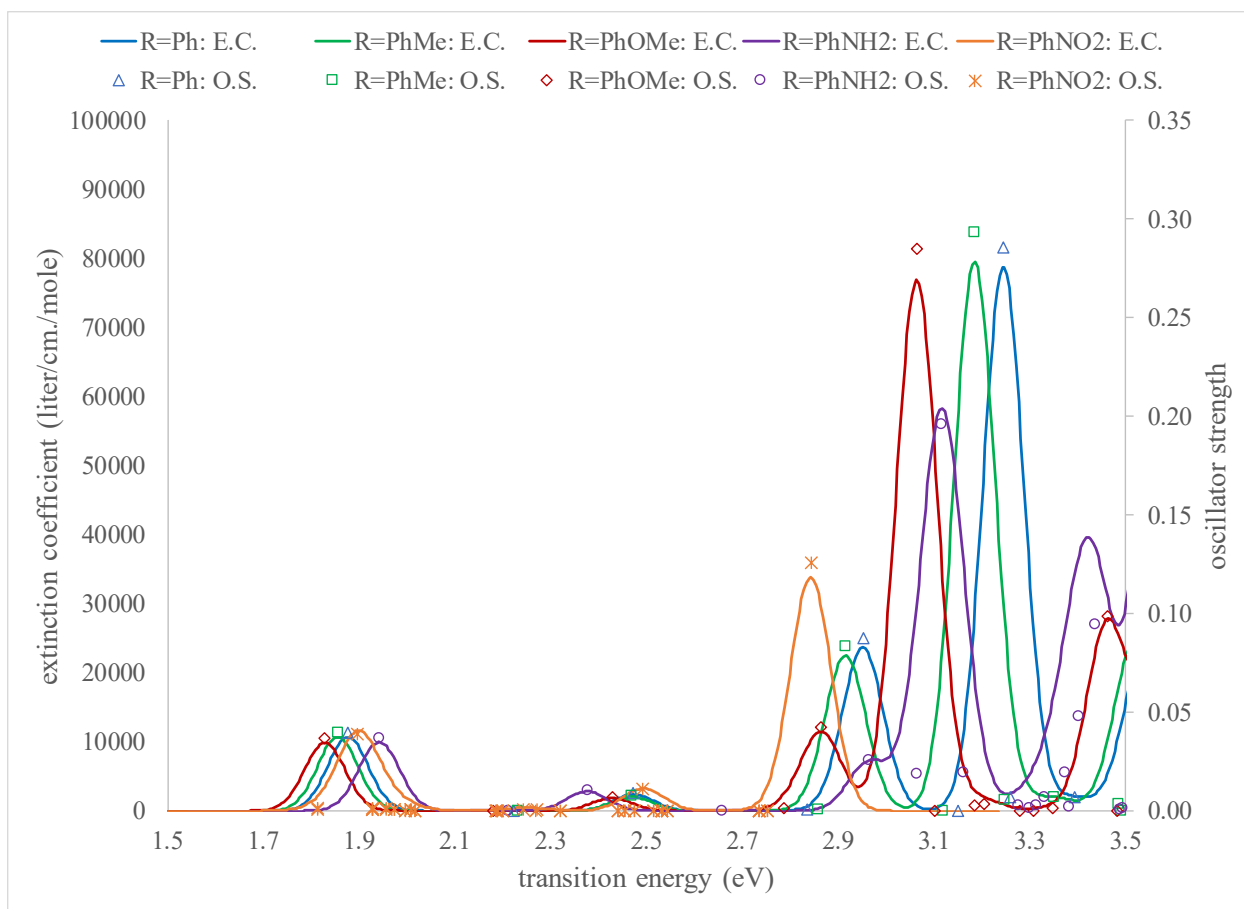

Figure S13. The effects of the ligands on the OPA of  $D_2 Au_9(PR_3)_8^{3+}$  calculated using evGW-BSE:CAMB3LYP. The oscillator strengths (O.S.) are plotted against the right vertical axis, while extinction coefficients (E.C.) were obtained by fitting to Gaussian linewidth functions with full-width at half-maximum (FWHM) of 0.1 eV.

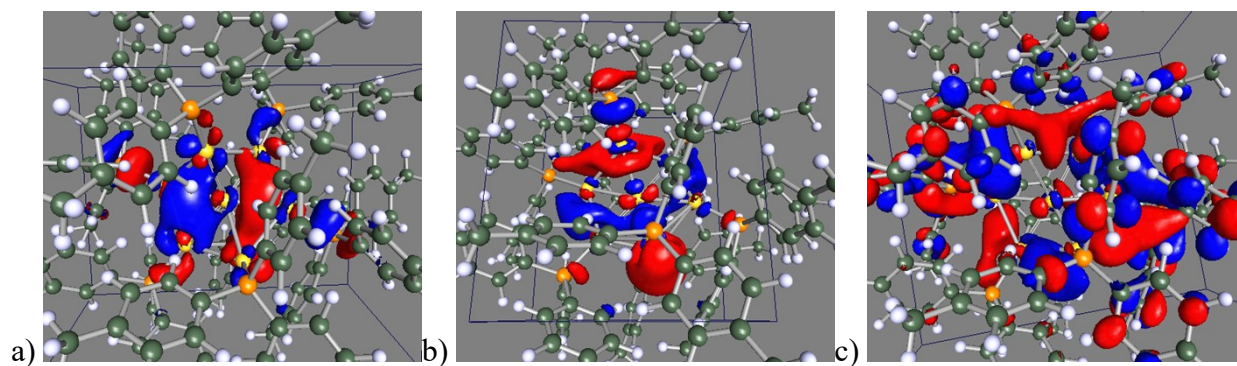

Figure S14. Key orbitals in the first TPA peak of  $\text{Au}_8(\text{PR}_3)_7^{2+}$  with  $\text{R} = \text{PhMe}$ . a) HOMO with superatom P character. b) LUMO with superatom D character. c) LUMO+3 with superatom F character.

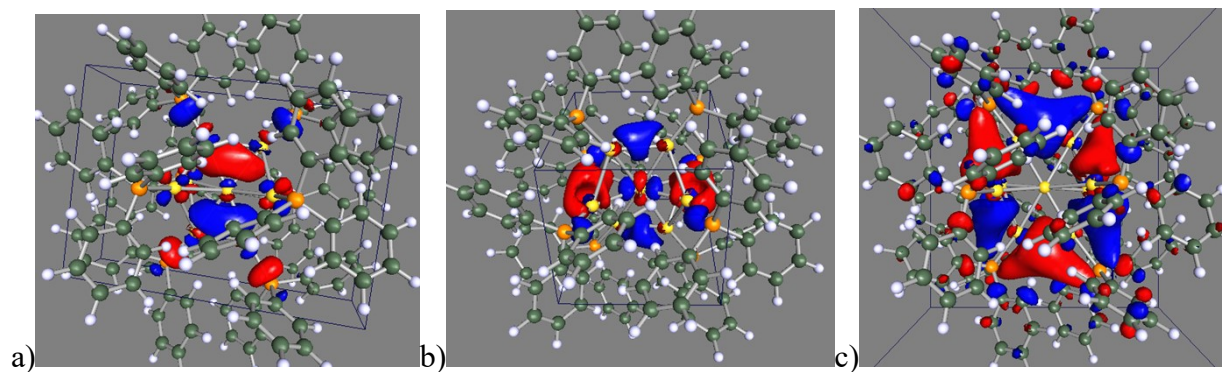

Figure S15. Key orbitals in the first TPA peak of  $\text{D}_2 \text{Au}_9(\text{PR}_3)_8^{3+}$  with  $\text{R} = \text{Ph}$ . a) HOMO with superatom P character. b) LUMO with superatom D character. c) LUMO+3 with superatom F character.

Coordinates optimized at the PBE0-D3 level of theory.

$\text{Au}_8(\text{PR}_3)_7^{2+}$ , R=Ph

|    |             |             |             |
|----|-------------|-------------|-------------|
| Au | 0.02350300  | 0.03033800  | -0.24326999 |
| Au | -2.12389493 | -1.53341806 | -0.20300101 |
| Au | 0.21807501  | -2.33780408 | 1.32655203  |
| Au | -2.34067392 | 1.21515405  | -0.68926197 |
| Au | 0.50079697  | -2.44351792 | -1.32364094 |
| Au | 2.55168295  | -0.77397001 | 0.19072101  |
| Au | 1.99777305  | 1.71778095  | -0.83749199 |
| Au | -0.23360300 | 2.39173388  | 0.86705899  |
| P  | -3.87126899 | -3.03681207 | -0.07480800 |
| P  | 0.12862700  | -2.31962609 | 3.65413404  |
| P  | -4.24580193 | 2.38804007  | -1.34246004 |
| P  | 0.76125097  | -2.24651694 | -3.63901901 |
| P  | 4.29350901  | -2.23198104 | 0.66102898  |
| P  | 3.46933508  | 3.34281206  | -1.58995295 |
| P  | -0.48534200 | 4.10496187  | 2.37383699  |
| C  | -4.23438692 | -3.83614898 | -1.67080498 |
| C  | -4.16587496 | -3.03912592 | -2.82262111 |
| C  | -4.47128820 | -3.58034897 | -4.06752586 |
| C  | -4.83737516 | -4.92277813 | -4.17188215 |
| C  | -4.89488077 | -5.72316313 | -3.03117704 |
| C  | -4.59396601 | -5.18470287 | -1.78008199 |
| C  | -5.44981384 | -2.31540704 | 0.48301801  |
| C  | -5.42987823 | -1.06440496 | 1.11347497  |
| C  | -6.61790419 | -0.46961799 | 1.53528595  |
| C  | -7.83332920 | -1.11910999 | 1.32154906  |
| C  | -7.86108589 | -2.36221504 | 0.68643701  |
| C  | -6.67453384 | -2.96101189 | 0.26666099  |
| C  | -3.46300507 | -4.37900591 | 1.08604002  |
| C  | -4.21525097 | -4.64393282 | 2.23406911  |
| C  | -3.80703497 | -5.64279604 | 3.11885905  |
| C  | -2.65933800 | -6.38753510 | 2.85464406  |
| C  | -1.89911401 | -6.11710119 | 1.71370304  |
| C  | -2.28749704 | -5.10692406 | 0.83995801  |
| C  | 1.04725897  | -3.69643593 | 4.41150093  |
| C  | 0.51322597  | -4.98891020 | 4.29958487  |
| C  | 1.23295701  | -6.08504820 | 4.76616001  |
| C  | 2.49739790  | -5.90528488 | 5.33111382  |
| C  | 3.03495789  | -4.62348986 | 5.43215084  |
| C  | 2.31521893  | -3.51858211 | 4.97653484  |
| C  | -1.56007195 | -2.38607311 | 4.34848309  |
| C  | -2.56635499 | -1.67085195 | 3.68471289  |
| C  | -3.85124803 | -1.61495304 | 4.22024298  |
| C  | -4.14658499 | -2.28760791 | 5.40631008  |
| C  | -3.15191889 | -3.01236796 | 6.06171083  |
| C  | -1.85979700 | -3.05824709 | 5.53992319  |
| C  | 0.82822698  | -0.79174501 | 4.37506199  |
| C  | 1.36074603  | 0.19878601  | 3.54319406  |
| C  | 1.90708399  | 1.35872602  | 4.09136200  |
| C  | 1.91672599  | 1.53910697  | 5.47304010  |
| C  | 1.36891103  | 0.56265098  | 6.30849886  |

|   |             |             |             |
|---|-------------|-------------|-------------|
| C | 0.82409197  | -0.59717798 | 5.76417923  |
| C | -5.24072981 | 1.48901403  | -2.57852697 |
| C | -5.88979483 | 0.31110099  | -2.17854595 |
| C | -6.56583118 | -0.46756899 | -3.11279392 |
| C | -6.59121895 | -0.08746000 | -4.45594692 |
| C | -5.94439602 | 1.07955897  | -4.85893011 |
| C | -5.27178192 | 1.86982298  | -3.92610788 |
| C | -3.89719296 | 4.00854778  | -2.11198211 |
| C | -2.57797909 | 4.31126785  | -2.47076893 |
| C | -2.28424001 | 5.50821781  | -3.12379193 |
| C | -3.30499196 | 6.41110516  | -3.41662788 |
| C | -4.62107897 | 6.12135696  | -3.04863501 |
| C | -4.91841412 | 4.92606688  | -2.39742208 |
| C | -5.35644817 | 2.71048808  | 0.06904700  |
| C | -4.78326607 | 2.80665898  | 1.34549701  |
| C | -5.57576418 | 3.10508394  | 2.45239711  |
| C | -6.94910192 | 3.29432511  | 2.29267001  |
| C | -7.52923822 | 3.17489100  | 1.02828002  |
| C | -6.73878717 | 2.88282800  | -0.08198700 |
| C | 2.47227097  | -2.41165209 | -4.24330187 |
| C | 2.79773211  | -3.13921595 | -5.39338398 |
| C | 4.12910891  | -3.24768806 | -5.79657793 |
| C | 5.13856077  | -2.62865400 | -5.06124306 |
| C | 4.81952620  | -1.90294302 | -3.91177297 |
| C | 3.49368906  | -1.80050600 | -3.49872494 |
| C | 0.25932401  | -0.53223699 | -4.03069496 |
| C | -1.08925200 | -0.18921299 | -3.85269499 |
| C | -1.50990200 | 1.11943698  | -4.06702280 |
| C | -0.58639902 | 2.10275602  | -4.43040085 |
| C | 0.75714999  | 1.77045000  | -4.58877707 |
| C | 1.17888999  | 0.45423800  | -4.39825487 |
| C | -0.27740401 | -3.31889105 | -4.67318201 |
| C | -0.67757499 | -2.94250298 | -5.96241713 |
| C | -1.44412398 | -3.81478405 | -6.73243284 |
| C | -1.81311905 | -5.06025124 | -6.22155523 |
| C | -1.42773604 | -5.43254614 | -4.93416500 |
| C | -0.66557699 | -4.56238890 | -4.15832710 |
| C | 5.76952696  | -2.00757504 | -0.38230401 |
| C | 6.56973791  | -3.06969500 | -0.81988400 |
| C | 7.71127415  | -2.81198311 | -1.57761502 |
| C | 8.06717014  | -1.49864900 | -1.88890600 |
| C | 7.27426481  | -0.43686801 | -1.45046794 |
| C | 6.12309599  | -0.68997502 | -0.70681697 |
| C | 4.90329218  | -2.23133397 | 2.37650299  |
| C | 5.70656919  | -3.26548505 | 2.87547588  |
| C | 6.19005823  | -3.20022607 | 4.17944622  |
| C | 5.87726688  | -2.10677505 | 4.99131823  |
| C | 5.07841587  | -1.07590199 | 4.49844790  |
| C | 4.59400511  | -1.13745201 | 3.19225597  |
| C | 3.59081197  | -3.87689400 | 0.32827300  |
| C | 2.94535708  | -4.58372402 | 1.35239995  |
| C | 2.16719508  | -5.69942522 | 1.04563999  |
| C | 2.01706100  | -6.11321306 | -0.27754301 |
| C | 2.66010594  | -5.41350412 | -1.29999197 |

|   |             |             |             |
|---|-------------|-------------|-------------|
| C | 3.44128609  | -4.29925013 | -1.00200701 |
| C | 3.91975808  | 3.21915102  | -3.34664798 |
| C | 3.77725410  | 4.28075695  | -4.24538183 |
| C | 4.07816076  | 4.09054899  | -5.59545422 |
| C | 4.52390385  | 2.84954906  | -6.04821491 |
| C | 4.67323780  | 1.78943896  | -5.15006590 |
| C | 4.36780882  | 1.97090995  | -3.80537295 |
| C | 5.04722881  | 3.23336005  | -0.67905003 |
| C | 5.01665020  | 2.77730107  | 0.64756602  |
| C | 6.19783401  | 2.66158605  | 1.37654305  |
| C | 7.41781998  | 2.99360108  | 0.78582001  |
| C | 7.45425177  | 3.44475698  | -0.53410202 |
| C | 6.27434015  | 3.56383801  | -1.26844800 |
| C | 2.82233310  | 5.02309990  | -1.30729496 |
| C | 3.65346694  | 6.10107183  | -0.97924298 |
| C | 3.09680104  | 7.34997511  | -0.70473301 |
| C | 1.71437502  | 7.52797222  | -0.75499201 |
| C | 0.88058197  | 6.45831299  | -1.08406198 |
| C | 1.43141603  | 5.20884800  | -1.35773695 |
| C | -1.61718595 | 3.61553407  | 3.72018409  |
| C | -2.40847492 | 4.55789900  | 4.39025593  |
| C | -3.24629092 | 4.15067816  | 5.42802620  |
| C | -3.30264306 | 2.80595303  | 5.79762411  |
| C | -2.52357697 | 1.86260796  | 5.12615919  |
| C | -1.68570495 | 2.26385498  | 4.08814287  |
| C | -1.18649197 | 5.63839197  | 1.68749106  |
| C | -0.71105403 | 6.90461016  | 2.04750800  |
| C | -1.29985499 | 8.04615211  | 1.50403404  |
| C | -2.36041093 | 7.92962694  | 0.60538101  |
| C | -2.83521295 | 6.66732407  | 0.24468400  |
| C | -2.24601698 | 5.52571297  | 0.77926302  |
| C | 1.07262695  | 4.62171412  | 3.16481209  |
| C | 2.20091510  | 4.76271915  | 2.34473300  |
| C | 3.41389108  | 5.17392015  | 2.89010811  |
| C | 3.50936103  | 5.44032001  | 4.25759697  |
| C | 2.38827491  | 5.30023289  | 5.07554722  |
| C | 1.16897500  | 4.89127588  | 4.53386116  |
| H | -3.87808704 | -1.98739195 | -2.73708296 |
| H | -4.41114092 | -2.95355105 | -4.96017504 |
| H | -5.07207203 | -5.34981298 | -5.14977312 |
| H | -5.17847013 | -6.77514505 | -3.11356711 |
| H | -4.63468218 | -5.81634092 | -0.88867998 |
| H | -4.47767019 | -0.53973502 | 1.24039495  |
| H | -6.59270096 | 0.51508301  | 2.00751996  |
| H | -8.76645374 | -0.64877999 | 1.64058101  |
| H | -8.81427574 | -2.86684203 | 0.51200300  |
| H | -6.70297813 | -3.92776108 | -0.24320599 |
| H | -5.11901093 | -4.06745195 | 2.44343305  |
| H | -4.39582920 | -5.84188890 | 4.01697588  |
| H | -2.35348296 | -7.18018913 | 3.54205489  |
| H | -0.99148500 | -6.68932676 | 1.50742197  |
| H | -1.67444003 | -4.87672091 | -0.03689500 |
| H | -0.46982700 | -5.13510513 | 3.84456110  |
| H | 0.80584300  | -7.08800316 | 4.68722677  |

|   |             |             |             |
|---|-------------|-------------|-------------|
| H | 3.06253791  | -6.76701021 | 5.69362402  |
| H | 4.02485704  | -4.47373199 | 5.86783791  |
| H | 2.75369310  | -2.52149606 | 5.05223799  |
| H | -2.33945990 | -1.15788805 | 2.74346209  |
| H | -4.63116884 | -1.05340600 | 3.70282602  |
| H | -5.15781212 | -2.25019789 | 5.81856012  |
| H | -3.37967205 | -3.54301405 | 6.98923016  |
| H | -1.08552504 | -3.62496901 | 6.06275415  |
| H | 1.34759200  | 0.07030100  | 2.45651388  |
| H | 2.31519890  | 2.12731004  | 3.43123603  |
| H | 2.34071493  | 2.45130801  | 5.89816284  |
| H | 1.36443901  | 0.70694101  | 7.39139318  |
| H | 0.39479199  | -1.35586703 | 6.42420006  |
| H | -5.86802483 | -0.00071200 | -1.13231301 |
| H | -7.06814289 | -1.38137996 | -2.78727102 |
| H | -7.12029219 | -0.70133197 | -5.18867397 |
| H | -5.96668577 | 1.38514400  | -5.90758610 |
| H | -4.77478695 | 2.78653908  | -4.25249290 |
| H | -1.78022099 | 3.60104203  | -2.23300409 |
| H | -1.25198400 | 5.73674393  | -3.40048099 |
| H | -3.07646298 | 7.34821892  | -3.92973495 |
| H | -5.42134905 | 6.83041477  | -3.27298188 |
| H | -5.95089722 | 4.70671701  | -2.11421704 |
| H | -3.71069694 | 2.63496709  | 1.47810996  |
| H | -5.11224985 | 3.18388104  | 3.43872190  |
| H | -7.57350779 | 3.52757001  | 3.15848589  |
| H | -8.60640430 | 3.30994701  | 0.90525299  |
| H | -7.20246077 | 2.77191210  | -1.06586301 |
| H | 2.01256490  | -3.62734389 | -5.97548008 |
| H | 4.37636614  | -3.82212591 | -6.69236517 |
| H | 6.18072414  | -2.71990705 | -5.37644005 |
| H | 5.60885191  | -1.43308902 | -3.32132697 |
| H | 3.24786806  | -1.25172305 | -2.58200502 |
| H | -1.81137598 | -0.94971597 | -3.54391599 |
| H | -2.56686902 | 1.36907196  | -3.95178604 |
| H | -0.92171401 | 3.12848091  | -4.60017586 |
| H | 1.48917902  | 2.52917504  | -4.87606382 |
| H | 2.23080397  | 0.20589299  | -4.54364491 |
| H | -0.39146501 | -1.96549594 | -6.36123991 |
| H | -1.75230002 | -3.52247596 | -7.73908901 |
| H | -2.41194797 | -5.74221897 | -6.83018208 |
| H | -1.73341405 | -6.39868307 | -4.52710295 |
| H | -0.37455601 | -4.83979416 | -3.14054990 |
| H | 6.29790115  | -4.10054398 | -0.57863897 |
| H | 8.33052063  | -3.64310193 | -1.92299294 |
| H | 8.96673584  | -1.30316496 | -2.47747707 |
| H | 7.54383421  | 0.59452802  | -1.68973100 |
| H | 5.49189377  | 0.14057200  | -0.37630200 |
| H | 5.95299196  | -4.12462521 | 2.24589300  |
| H | 6.81878424  | -4.00616503 | 4.56538010  |
| H | 6.26118279  | -2.06045699 | 6.01341915  |
| H | 4.82081795  | -0.22251400 | 5.13061523  |
| H | 3.96252608  | -0.33572501 | 2.80267191  |
| H | 3.03667688  | -4.26265717 | 2.39269900  |



|   |             |             |             |
|---|-------------|-------------|-------------|
| H | 1.67555106  | -6.24025106 | 1.85668194  |
| H | 1.40492797  | -6.98718309 | -0.51342899 |
| H | 2.55367398  | -5.73112488 | -2.34015989 |
| H | 3.92133093  | -3.74839211 | -1.81390500 |
| H | 3.42628407  | 5.25419617  | -3.89333701 |
| H | 3.96471405  | 4.92023087  | -6.29708910 |
| H | 4.75541782  | 2.70581698  | -7.10611820 |
| H | 5.01527882  | 0.81194401  | -5.49963808 |
| H | 4.46280479  | 1.13416398  | -3.10635495 |
| H | 4.06248283  | 2.49397302  | 1.10201895  |
| H | 6.16612101  | 2.29584002  | 2.40569210  |
| H | 8.34563828  | 2.89344501  | 1.35383105  |
| H | 8.40919876  | 3.70403790  | -0.99751198 |
| H | 6.30940580  | 3.90403295  | -2.30692291 |
| H | 4.73632479  | 5.96253014  | -0.92266101 |
| H | 3.74793792  | 8.18720818  | -0.44292399 |
| H | 1.27986300  | 8.50331974  | -0.52437299 |
| H | -0.20403101 | 6.59092712  | -1.09816396 |
| H | 0.77909398  | 4.35860682  | -1.58238006 |
| H | -2.37734008 | 5.61031008  | 4.09636116  |
| H | -3.85998392 | 4.88935804  | 5.94905615  |
| H | -3.96097994 | 2.49121499  | 6.61104107  |
| H | -2.57053709 | 0.80648202  | 5.40198612  |
| H | -1.08280802 | 1.52058804  | 3.55933809  |
| H | 0.12480500  | 7.00129414  | 2.74429703  |
| H | -0.92711002 | 9.03342247  | 1.78728199  |
| H | -2.81878400 | 8.82662678  | 0.18220800  |
| H | -3.65847898 | 6.56640911  | -0.46522999 |
| H | -2.60418701 | 4.53835297  | 0.47935501  |
| H | 2.12719607  | 4.54738283  | 1.27515304  |
| H | 4.28798914  | 5.27998877  | 2.24329805  |
| H | 4.46161079  | 5.76050997  | 4.68715620  |
| H | 2.46107292  | 5.51202917  | 6.14511919  |
| H | 0.29576299  | 4.77367020  | 5.18023682  |

$\text{Au}_8(\text{PR}_3)_7^{2+}$ , R=PhMe

|    |             |             |             |
|----|-------------|-------------|-------------|
| Au | 0.06896200  | 0.03643500  | -0.18394899 |
| Au | -1.74048305 | -1.91126800 | -0.15599500 |
| Au | 0.69157600  | -2.21871209 | 1.39478302  |
| Au | -2.46267509 | 0.72019303  | -0.76539499 |
| Au | 0.97005498  | -2.31340408 | -1.25751305 |
| Au | 2.70298100  | -0.24483000 | 0.24877000  |
| Au | 1.65282702  | 2.10473895  | -0.74777699 |
| Au | -0.72611701 | 2.29311490  | 0.88094199  |
| P  | -3.29398489 | -3.61330891 | -0.10758500 |
| P  | 0.63738102  | -2.31944704 | 3.71706009  |
| P  | -4.53318405 | 1.58748698  | -1.39925802 |
| P  | 1.22077894  | -2.31189394 | -3.57563496 |
| P  | 4.67109585  | -1.41233802 | 0.65782797  |
| P  | 2.66966891  | 3.95322490  | -1.70878601 |
| P  | -1.22858405 | 3.94295907  | 2.39576793  |
| C  | -3.51960993 | -4.35228586 | -1.75431597 |

|   |             |             |             |
|---|-------------|-------------|-------------|
| C | -3.67723608 | -3.46453500 | -2.82965899 |
| C | -3.85866904 | -3.94650888 | -4.11793423 |
| C | -3.88194489 | -5.32548380 | -4.37722111 |
| C | -3.71360111 | -6.20136881 | -3.29927802 |
| C | -3.53495693 | -5.72749710 | -1.99874997 |
| C | -4.95494795 | -3.08892107 | 0.41784400  |
| C | -5.09133387 | -1.89408505 | 1.13403201  |
| C | -6.34846878 | -1.44781399 | 1.53104496  |
| C | -7.50462723 | -2.16846895 | 1.20688605  |
| C | -7.35937595 | -3.36196303 | 0.48396200  |
| C | -6.10448694 | -3.82064795 | 0.09286600  |
| C | -2.76770592 | -4.93657017 | 1.02224302  |
| C | -3.56312799 | -5.40057993 | 2.07485199  |
| C | -3.06387091 | -6.34980202 | 2.96282697  |
| C | -1.77070403 | -6.86817694 | 2.82287598  |
| C | -0.98235899 | -6.39459705 | 1.76444697  |
| C | -1.46227098 | -5.43086100 | 0.88436300  |
| C | 1.67769897  | -3.65722108 | 4.37683487  |
| C | 1.20532405  | -4.97627211 | 4.30361319  |
| C | 2.02762008  | -6.03715706 | 4.66503286  |
| C | 3.34504199  | -5.82392883 | 5.09781885  |
| C | 3.80490088  | -4.50431490 | 5.16119194  |
| C | 2.99084902  | -3.43107796 | 4.80409813  |
| C | -1.02851999 | -2.58610106 | 4.41336489  |
| C | -2.13700294 | -2.11074090 | 3.70509696  |
| C | -3.41577101 | -2.22054696 | 4.24713421  |
| C | -3.62682295 | -2.81454706 | 5.49543095  |
| C | -2.50926089 | -3.29484701 | 6.19439077  |
| C | -1.22778797 | -3.18177605 | 5.66707277  |
| C | 1.21460605  | -0.77559000 | 4.50053596  |
| C | 1.37739205  | 0.38164699  | 3.73141599  |
| C | 1.80945897  | 1.56755102  | 4.32296705  |
| C | 2.09300590  | 1.62913799  | 5.69212580  |
| C | 1.90868998  | 0.46774301  | 6.45830822  |
| C | 1.47040999  | -0.71601999 | 5.87773085  |
| C | -5.47049093 | 0.56997401  | -2.58131695 |
| C | -6.01304483 | -0.64792299 | -2.14177895 |
| C | -6.58456898 | -1.52964306 | -3.04922199 |
| C | -6.62733412 | -1.23904896 | -4.42123795 |
| C | -6.09718609 | -0.01673200 | -4.84724283 |
| C | -5.52830601 | 0.88131499  | -3.94409609 |
| C | -4.39139700 | 3.23949194  | -2.16237998 |
| C | -3.11698508 | 3.74885607  | -2.44131708 |
| C | -2.97035408 | 5.00791693  | -3.01588607 |
| C | -4.08457518 | 5.79700184  | -3.32331491 |
| C | -5.35848999 | 5.27355099  | -3.05523992 |
| C | -5.51447821 | 4.01565695  | -2.48005891 |
| C | -5.60405207 | 1.78041005  | 0.06574400  |
| C | -4.99368811 | 1.90092504  | 1.32038605  |
| C | -5.75980091 | 2.09217405  | 2.46766400  |
| C | -7.15615892 | 2.15400791  | 2.39804912  |
| C | -7.76197815 | 2.01086593  | 1.13957405  |
| C | -7.00312281 | 1.82667196  | -0.01158100 |
| C | 2.93994308  | -2.08570910 | -4.12521601 |

|   |             |             |             |
|---|-------------|-------------|-------------|
| C | 3.53405905  | -2.86871696 | -5.11828518 |
| C | 4.87102079  | -2.66806412 | -5.46303082 |
| C | 5.64371109  | -1.68529499 | -4.83554792 |
| C | 5.03658009  | -0.90474898 | -3.83938098 |
| C | 3.70938206  | -1.10403597 | -3.48027492 |
| C | 0.30285999  | -0.87229103 | -4.21603298 |
| C | -1.06315100 | -0.78115499 | -3.91588092 |
| C | -1.80352604 | 0.31775400  | -4.33771992 |
| C | -1.20004904 | 1.36703706  | -5.04682016 |
| C | 0.17184800  | 1.28092694  | -5.30947590 |
| C | 0.91589200  | 0.17290500  | -4.91276312 |
| C | 0.55752701  | -3.76675797 | -4.43364286 |
| C | 0.18016601  | -3.73595405 | -5.78136492 |
| C | -0.29819399 | -4.88934517 | -6.39776993 |
| C | -0.41887099 | -6.09476423 | -5.69226789 |
| C | -0.06358900 | -6.10528183 | -4.33691978 |
| C | 0.41824201  | -4.95982409 | -3.71364903 |
| C | 6.08844900  | -0.88650101 | -0.35276899 |
| C | 7.10620308  | -1.75227499 | -0.77403098 |
| C | 8.17626572  | -1.26128304 | -1.51468897 |
| C | 8.27187061  | 0.09943100  | -1.84722102 |
| C | 7.25230694  | 0.95590299  | -1.41571999 |
| C | 6.17017412  | 0.47087401  | -0.68395799 |
| C | 5.23307991  | -1.40993702 | 2.38770199  |
| C | 6.13629293  | -2.35789299 | 2.88580298  |
| C | 6.53796101  | -2.30604506 | 4.21608210  |
| C | 6.05505800  | -1.31526399 | 5.08547783  |
| C | 5.15823603  | -0.36955300 | 4.57443714  |
| C | 4.75214481  | -0.41340601 | 3.24317694  |
| C | 4.25559711  | -3.13225603 | 0.23900500  |
| C | 3.61406302  | -3.92772102 | 1.20128703  |
| C | 2.98644805  | -5.11189222 | 0.83040297  |
| C | 2.97212911  | -5.54104710 | -0.50455600 |
| C | 3.63931203  | -4.75535297 | -1.45198405 |
| C | 4.26889801  | -3.56459904 | -1.09306002 |
| C | 2.90054607  | 3.75804591  | -3.50251007 |
| C | 2.36894488  | 4.64032316  | -4.44545412 |
| C | 2.53506207  | 4.38832521  | -5.80818510 |
| C | 3.23205495  | 3.26285291  | -6.26162720 |
| C | 3.76694989  | 2.38777494  | -5.30209684 |
| C | 3.59784198  | 2.62353897  | -3.94504690 |
| C | 4.34707212  | 4.19921017  | -1.03930199 |
| C | 4.60154009  | 3.80999899  | 0.28381899  |
| C | 5.87521219  | 3.94538403  | 0.82577598  |
| C | 6.93499613  | 4.46022797  | 0.06550300  |
| C | 6.66880512  | 4.85222483  | -1.25332606 |
| C | 5.39581394  | 4.72273493  | -1.80466497 |
| C | 1.75795698  | 5.50746012  | -1.45600498 |
| C | 2.39228010  | 6.75571918  | -1.42342901 |
| C | 1.64594305  | 7.91300297  | -1.22336602 |
| C | 0.25593400  | 7.86152601  | -1.04600000 |
| C | -0.36865199 | 6.60828590  | -1.07230699 |
| C | 0.36973900  | 5.44553423  | -1.27288997 |
| C | -2.19782710 | 3.24976802  | 3.77679110  |

|   |             |             |             |
|---|-------------|-------------|-------------|
| C | -3.15963101 | 3.99746609  | 4.46651983  |
| C | -3.89004898 | 3.41388893  | 5.50038385  |
| C | -3.68784094 | 2.07708311  | 5.86969280  |
| C | -2.72272110 | 1.33766103  | 5.17144394  |
| C | -1.98989797 | 1.91058803  | 4.13842916  |
| C | -2.21774602 | 5.32345200  | 1.74195004  |
| C | -2.00073695 | 6.65562487  | 2.11519909  |
| C | -2.79791999 | 7.66633177  | 1.58517098  |
| C | -3.82328606 | 7.38298082  | 0.67208099  |
| C | -4.02729893 | 6.04676723  | 0.30494300  |
| C | -3.23423791 | 5.03093481  | 0.82705599  |
| C | 0.24293700  | 4.73160791  | 3.11985207  |
| C | 1.36260200  | 4.92435312  | 2.30184293  |
| C | 2.48238897  | 5.59224892  | 2.78904390  |
| C | 2.51848698  | 6.08133078  | 4.10126686  |
| C | 1.39380598  | 5.87488317  | 4.91323614  |
| C | 0.26954001  | 5.20728302  | 4.43636417  |
| H | -3.66746092 | -2.38572907 | -2.64910007 |
| H | -3.97716594 | -3.23725796 | -4.94192696 |
| H | -3.72703099 | -7.28009796 | -3.47808504 |
| H | -3.40435195 | -6.43343592 | -1.17419899 |
| H | -4.20539188 | -1.28863502 | 1.34777403  |
| H | -6.43421698 | -0.50237399 | 2.07195997  |
| H | -8.24864960 | -3.94040489 | 0.21836799  |
| H | -6.01913595 | -4.74672794 | -0.48252600 |
| H | -4.57547379 | -5.01220703 | 2.20910192  |
| H | -3.69643807 | -6.69860792 | 3.78370094  |
| H | 0.03402500  | -6.77749395 | 1.63720000  |
| H | -0.81315202 | -5.04484606 | 0.09164800  |
| H | 0.18732201  | -5.17266083 | 3.95647001  |
| H | 1.63870704  | -7.05777884 | 4.61119413  |
| H | 4.82673502  | -4.30364990 | 5.49252510  |
| H | 3.39488506  | -2.41696191 | 4.84743404  |
| H | -1.99797297 | -1.65070796 | 2.72078991  |
| H | -4.27221107 | -1.84469497 | 3.68369889  |
| H | -2.64686894 | -3.76584697 | 7.17184877  |
| H | -0.37656599 | -3.56894112 | 6.23320484  |
| H | 1.17755401  | 0.36197901  | 2.65482092  |
| H | 1.93232095  | 2.45941710  | 3.70199800  |
| H | 2.11827993  | 0.49313399  | 7.53137302  |
| H | 1.34333503  | -1.60543597 | 6.50040293  |
| H | -5.97884417 | -0.91600102 | -1.08387601 |
| H | -6.99098206 | -2.47614002 | -2.68274689 |
| H | -6.12736988 | 0.24201700  | -5.90909386 |
| H | -5.12511015 | 1.82888901  | -4.30942202 |
| H | -2.23228097 | 3.14796805  | -2.20563889 |
| H | -1.96648097 | 5.38731194  | -3.22349191 |
| H | -6.24490690 | 5.86601591  | -3.29808402 |
| H | -6.52000713 | 3.63837504  | -2.27684307 |
| H | -3.90496206 | 1.83065999  | 1.40856302  |
| H | -5.25556803 | 2.18787694  | 3.43254089  |
| H | -8.85259247 | 2.04139900  | 1.06264997  |
| H | -7.50433493 | 1.69734895  | -0.97476900 |
| H | 2.95511103  | -3.64372611 | -5.62652111 |

|   |             |             |             |
|---|-------------|-------------|-------------|
| H | 5.32143116  | -3.29158306 | -6.24006319 |
| H | 5.62695217  | -0.14686801 | -3.31767988 |
| H | 3.26659107  | -0.50449800 | -2.67649198 |
| H | -1.54851902 | -1.57409501 | -3.34078503 |
| H | -2.87145805 | 0.36135301  | -4.10810804 |
| H | 0.67615199  | 2.09735394  | -5.83385992 |
| H | 1.98267901  | 0.13604100  | -5.14031315 |
| H | 0.25574401  | -2.80469990 | -6.34969282 |
| H | -0.58349198 | -4.85466909 | -7.45296907 |
| H | -0.17353500 | -7.02648306 | -3.75826406 |
| H | 0.68278098  | -4.98133421 | -2.65245295 |
| H | 7.05904722  | -2.81701803 | -0.53066200 |
| H | 8.96330070  | -1.94860399 | -1.83825004 |
| H | 7.29368114  | 2.02118111  | -1.65904498 |
| H | 5.37569809  | 1.15610301  | -0.37405100 |
| H | 6.51656818  | -3.15059209 | 2.23589993  |
| H | 7.23980188  | -3.05513501 | 4.59355497  |
| H | 4.74940491  | 0.40334201  | 5.23045588  |
| H | 4.03560591  | 0.32180399  | 2.86878800  |
| H | 3.58806396  | -3.61732197 | 2.24780703  |
| H | 2.48874593  | -5.70501804 | 1.60267496  |
| H | 3.65460706  | -5.06685305 | -2.50005388 |
| H | 4.74390793  | -2.95858312 | -1.86731803 |
| H | 1.82406104  | 5.52963877  | -4.11805296 |
| H | 2.11604404  | 5.08840322  | -6.53615713 |
| H | 4.31490517  | 1.49731600  | -5.62486887 |
| H | 4.00652409  | 1.91631997  | -3.21727300 |
| H | 3.79816389  | 3.37297702  | 0.88500398  |
| H | 6.05688381  | 3.62422609  | 1.85529602  |
| H | 7.47763586  | 5.26211977  | -1.86467099 |
| H | 5.22224998  | 5.01658916  | -2.84345293 |
| H | 3.47598505  | 6.82484388  | -1.54948294 |
| H | 2.15443301  | 8.88091564  | -1.20330501 |
| H | -1.44854701 | 6.53706312  | -0.91709501 |
| H | -0.13566500 | 4.47404718  | -1.26736200 |
| H | -3.35669303 | 5.03459120  | 4.18218994  |
| H | -4.64425421 | 4.00852585  | 6.02336407  |
| H | -2.55236793 | 0.28819901  | 5.42635012  |
| H | -1.25692403 | 1.30370998  | 3.59982991  |
| H | -1.19726896 | 6.90899277  | 2.81081796  |
| H | -2.61455107 | 8.70251179  | 1.88253796  |
| H | -4.80771685 | 5.79300213  | -0.41575199 |
| H | -3.39929795 | 4.00126410  | 0.50489300  |
| H | 1.35710800  | 4.54806089  | 1.27489603  |
| H | 3.34638309  | 5.73423815  | 2.13396192  |
| H | 1.40293097  | 6.23908091  | 5.94443083  |
| H | -0.58944201 | 5.04999399  | 5.09418583  |
| C | -4.08573008 | -5.82455015 | -5.77617884 |
| H | -3.30318689 | -5.43432283 | -6.44540215 |
| H | -4.06463718 | -6.92137098 | -5.82843781 |
| H | -5.05379486 | -5.48575306 | -6.17846680 |
| C | -8.86163998 | -1.64866996 | 1.57600296  |
| H | -8.81901646 | -1.00973201 | 2.46952605  |
| H | -9.27192307 | -1.03549302 | 0.75627100  |

|   |             |             |             |
|---|-------------|-------------|-------------|
| H | -9.57430840 | -2.46458507 | 1.76310802  |
| C | -1.23976898 | -7.87370396 | 3.80173802  |
| H | -1.98702598 | -8.64897537 | 4.02673721  |
| H | -0.33605301 | -8.37188339 | 3.42313600  |
| H | -0.98237902 | -7.38970900 | 4.75900984  |
| C | -5.00658989 | -2.95052505 | 6.06826210  |
| H | -5.75661087 | -2.44905305 | 5.44077301  |
| H | -5.29487801 | -4.01064682 | 6.15340614  |
| H | -5.06308222 | -2.52338195 | 7.08179808  |
| C | 2.55936408  | 2.90065098  | 6.33452082  |
| H | 3.26355505  | 2.70402193  | 7.15618992  |
| H | 3.04037094  | 3.56789088  | 5.60636377  |
| H | 1.70520699  | 3.45253706  | 6.75986385  |
| C | 4.23511410  | -6.97821808 | 5.44972420  |
| H | 4.65833378  | -7.43366814 | 4.53881788  |
| H | 5.07705021  | -6.66425991 | 6.08225489  |
| H | 3.68242311  | -7.76775122 | 5.97971010  |
| C | -7.22618580 | -2.21856499 | -5.38582182 |
| H | -8.30699730 | -2.33764505 | -5.20818710 |
| H | -7.09069586 | -1.90114105 | -6.42886114 |
| H | -6.76991701 | -3.21422410 | -5.26545191 |
| C | -7.98813820 | 2.35962510  | 3.62891006  |
| H | -7.37320709 | 2.34418011  | 4.53946781  |
| H | -8.51189613 | 3.32825208  | 3.59162807  |
| H | -8.76250744 | 1.58220506  | 3.72354889  |
| C | -3.91224599 | 7.17718697  | -3.88302302 |
| H | -3.07632804 | 7.22226715  | -4.59608603 |
| H | -4.82052517 | 7.53088713  | -4.39033604 |
| H | -3.68495202 | 7.89181423  | -3.07359409 |
| C | -0.89297497 | -7.34793901 | -6.36560106 |
| H | -1.43114305 | -7.13445616 | -7.29937315 |
| H | -0.03822200 | -7.99668217 | -6.61884308 |
| H | -1.55595195 | -7.93010521 | -5.70862103 |
| C | 7.08910990  | -1.48463905 | -5.18134403 |
| H | 7.36004877  | -1.98827899 | -6.11932421 |
| H | 7.33105612  | -0.41544101 | -5.27934408 |
| H | 7.73367786  | -1.88691902 | -4.38261080 |
| C | -1.99841297 | 2.53384995  | -5.54760695 |
| H | -2.25508809 | 2.39845109  | -6.61143017 |
| H | -1.43065500 | 3.47284603  | -5.46784878 |
| H | -2.93676090 | 2.65775609  | -4.99118805 |
| C | 6.50019407  | -1.26195502 | 6.51661587  |
| H | 5.74786377  | -0.77649802 | 7.15447712  |
| H | 6.69913721  | -2.26600695 | 6.91865778  |
| H | 7.43475485  | -0.68435901 | 6.61122608  |
| C | 9.43221760  | 0.60744798  | -2.64998507 |
| H | 9.38943768  | 1.69737005  | -2.78147292 |
| H | 10.38901901 | 0.35911101  | -2.16503501 |
| H | 9.45203400  | 0.14613700  | -3.65050006 |
| C | 2.24974489  | -6.79704523 | -0.89577901 |
| H | 1.16429198  | -6.69590521 | -0.72775298 |
| H | 2.40288591  | -7.04176188 | -1.95592499 |
| H | 2.58741498  | -7.65682316 | -0.29651800 |
| C | -0.53319699 | 9.11277390  | -0.80157202 |

|   |             |            |             |
|---|-------------|------------|-------------|
| H | -0.47840399 | 9.40241814 | 0.26078799  |
| H | -0.14544800 | 9.95693970 | -1.39020395 |
| H | -1.59529197 | 8.97222328 | -1.04655504 |
| C | 3.38421011  | 2.97219205 | -7.72514820 |
| H | 2.74353409  | 2.12525296 | -8.02256203 |
| H | 3.10433197  | 3.83532500 | -8.34450054 |
| H | 4.41953611  | 2.69342589 | -7.97246981 |
| C | 8.32069683  | 4.53684092 | 0.63235098  |
| H | 8.83173084  | 3.56506896 | 0.52384502  |
| H | 8.93156624  | 5.29079103 | 0.11648400  |
| H | 8.30705643  | 4.77659512 | 1.70532596  |
| C | -4.68350697 | 8.47851372 | 0.11560100  |
| H | -5.20273113 | 8.15937805 | -0.79915100 |
| H | -5.45424700 | 8.77778816 | 0.84487402  |
| H | -4.09421015 | 9.37893391 | -0.11443300 |
| C | -4.47028589 | 1.45040905 | 6.98545980  |
| H | -4.63983202 | 0.37906101 | 6.80250502  |
| H | -3.92216706 | 1.53467906 | 7.93859196  |
| H | -5.44487619 | 1.93949294 | 7.12597322  |
| C | 3.71725512  | 6.81455421 | 4.62541103  |
| H | 4.59208298  | 6.67998695 | 3.97422504  |
| H | 3.51457810  | 7.89612484 | 4.69080114  |
| H | 3.98425293  | 6.47710514 | 5.63834715  |

### Au<sub>8</sub>(PR<sub>3</sub>)<sub>7</sub><sup>2+</sup>, R=PhOMe

|    |             |             |             |
|----|-------------|-------------|-------------|
| Au | 0.03776500  | -0.03156700 | -0.32494301 |
| Au | -2.15971088 | -1.52328897 | -0.28582501 |
| Au | 0.03766100  | -2.27628112 | 1.41489303  |
| Au | -2.27249408 | 1.17679799  | -0.97728300 |
| Au | 0.53776598  | -2.57533002 | -1.19315600 |
| Au | 2.52960706  | -0.80554199 | 0.35311699  |
| Au | 2.03531504  | 1.60255206  | -0.92740798 |
| Au | -0.23937500 | 2.39274192  | 0.63945901  |
| P  | -3.93245292 | -3.00615191 | -0.21311200 |
| P  | -0.22729100 | -2.11349201 | 3.72729206  |
| P  | -4.20438194 | 2.23808098  | -1.74636602 |
| P  | 1.05255103  | -2.56171393 | -3.48041701 |
| P  | 4.24372911  | -2.20893502 | 1.07360303  |
| P  | 3.70420504  | 3.11417294  | -1.48383796 |
| P  | -0.63968402 | 4.16276121  | 2.05088711  |
| C  | -4.28147602 | -3.68108797 | -1.86083698 |
| C  | -4.02807903 | -2.85785294 | -2.96437407 |
| C  | -4.29581594 | -3.28295398 | -4.25993395 |
| C  | -4.83748579 | -4.55679417 | -4.47226620 |
| C  | -5.07583904 | -5.39990187 | -3.37240696 |
| C  | -4.79917002 | -4.96742821 | -2.08392406 |
| C  | -5.47323179 | -2.29969311 | 0.44486201  |
| C  | -5.48044491 | -0.96077102 | 0.84222400  |
| C  | -6.61515284 | -0.37002999 | 1.39838600  |
| C  | -7.77213717 | -1.13816297 | 1.58017898  |
| C  | -7.78670120 | -2.47960901 | 1.15226996  |
| C  | -6.65603018 | -3.04722095 | 0.58797002  |

|   |             |             |             |
|---|-------------|-------------|-------------|
| C | -3.49436498 | -4.40148592 | 0.86455899  |
| C | -4.10085917 | -4.63286686 | 2.09981394  |
| C | -3.59354591 | -5.58344698 | 2.98660111  |
| C | -2.45894003 | -6.32300520 | 2.63684607  |
| C | -1.84767997 | -6.10894012 | 1.38916004  |
| C | -2.35179901 | -5.15255213 | 0.52637702  |
| C | 0.65053803  | -3.42556810 | 4.62582779  |
| C | 0.21391401  | -4.75071812 | 4.44708586  |
| C | 0.90196103  | -5.80625820 | 5.01746798  |
| C | 2.05965400  | -5.56893396 | 5.78119087  |
| C | 2.50404596  | -4.25306511 | 5.96166897  |
| C | 1.80094194  | -3.19662189 | 5.38185978  |
| C | -1.94440198 | -2.19907999 | 4.32718992  |
| C | -2.96719193 | -1.67720401 | 3.53099298  |
| C | -4.28769684 | -1.66386902 | 3.97427893  |
| C | -4.60618019 | -2.19180894 | 5.23128319  |
| C | -3.58685088 | -2.72967005 | 6.03389406  |
| C | -2.27494311 | -2.73263788 | 5.58468914  |
| C | 0.43220201  | -0.54700100 | 4.38389921  |
| C | 1.11283100  | 0.33328801  | 3.54066491  |
| C | 1.75871503  | 1.46139896  | 4.04060078  |
| C | 1.72855902  | 1.72550595  | 5.41426516  |
| C | 0.97001600  | 0.89597702  | 6.25922394  |
| C | 0.33463299  | -0.22473800 | 5.74951315  |
| C | -5.19860888 | 1.15868199  | -2.82045388 |
| C | -6.12651014 | 0.26390401  | -2.27915406 |
| C | -6.74257088 | -0.70528799 | -3.06649494 |
| C | -6.42745399 | -0.79931098 | -4.42694998 |
| C | -5.51454496 | 0.11064500  | -4.98538017 |
| C | -4.90624619 | 1.07133698  | -4.19276094 |
| C | -3.89916992 | 3.74414396  | -2.72413611 |
| C | -2.58442998 | 4.10005617  | -3.03264999 |
| C | -2.29758596 | 5.24744701  | -3.76989889 |
| C | -3.34230399 | 6.06999207  | -4.20033884 |
| C | -4.67188597 | 5.71584082  | -3.90629292 |
| C | -4.94373608 | 4.56732178  | -3.18372202 |
| C | -5.26850319 | 2.70185590  | -0.34405500 |
| C | -4.69059801 | 2.77417898  | 0.92837900  |
| C | -5.43259811 | 3.14527607  | 2.04740810  |
| C | -6.79313612 | 3.44461989  | 1.90385997  |
| C | -7.38476992 | 3.37943792  | 0.62912899  |
| C | -6.63429117 | 3.00993705  | -0.47504100 |
| C | 2.79993105  | -2.87096190 | -3.87718296 |
| C | 3.24616194  | -3.63013196 | -4.96003103 |
| C | 4.60831499  | -3.73328304 | -5.25613594 |
| C | 5.54522896  | -3.05663300 | -4.46501398 |
| C | 5.10448599  | -2.32112288 | -3.35324907 |
| C | 3.75564694  | -2.23560691 | -3.06382608 |
| C | 0.80283600  | -0.82631302 | -4.00035191 |
| C | -0.47486699 | -0.25571299 | -3.86503100 |
| C | -0.67359698 | 1.09548700  | -4.09584808 |
| C | 0.40823600  | 1.92465401  | -4.43575716 |
| C | 1.67783701  | 1.36373401  | -4.59734297 |
| C | 1.86141896  | -0.00107900 | -4.38523817 |



|   |             |             |             |
|---|-------------|-------------|-------------|
| C | 0.03160600  | -3.58915210 | -4.56680298 |
| C | -0.02959800 | -3.38370609 | -5.94961023 |
| C | -0.78821498 | -4.22002411 | -6.76551199 |
| C | -1.51501501 | -5.27763414 | -6.19579315 |
| C | -1.49020505 | -5.46434689 | -4.80418777 |
| C | -0.72571701 | -4.63077021 | -4.00533199 |
| C | 5.79527187  | -2.04468393 | 0.14629599  |
| C | 6.64884186  | -3.12094498 | -0.15049900 |
| C | 7.81149197  | -2.91827893 | -0.87565702 |
| C | 8.16114521  | -1.62952805 | -1.31614006 |
| C | 7.33081913  | -0.54481798 | -0.99957401 |
| C | 6.15746784  | -0.76237899 | -0.28020200 |
| C | 4.65640020  | -2.12442088 | 2.83917499  |
| C | 5.36883116  | -3.13921809 | 3.50128698  |
| C | 5.62748003  | -3.04271698 | 4.85713816  |
| C | 5.17165613  | -1.93314898 | 5.59231615  |
| C | 4.49597502  | -0.89857399 | 4.93456316  |
| C | 4.24485779  | -1.00883698 | 3.56750798  |
| C | 3.55746198  | -3.86349297 | 0.77418000  |
| C | 2.69866705  | -4.43811512 | 1.72877800  |
| C | 1.87331295  | -5.49792385 | 1.38732004  |
| C | 1.86668003  | -6.00155687 | 0.07746800  |
| C | 2.74324203  | -5.46198320 | -0.87164599 |
| C | 3.57569408  | -4.40255785 | -0.51661402 |
| C | 4.58976507  | 2.74752498  | -3.02586198 |
| C | 4.86772919  | 3.68371892  | -4.03210402 |
| C | 5.49592209  | 3.28977609  | -5.20706415 |
| C | 5.87118387  | 1.94967401  | -5.39896297 |
| C | 5.60366201  | 1.00868201  | -4.39252281 |
| C | 4.96163321  | 1.41252899  | -3.22801805 |
| C | 4.98578310  | 2.97403193  | -0.19132499 |
| C | 4.60359097  | 2.53685808  | 1.08314705  |
| C | 5.54571295  | 2.26430607  | 2.07010198  |
| C | 6.91045713  | 2.42363906  | 1.79174995  |
| C | 7.30283880  | 2.89956403  | 0.52807897  |
| C | 6.35476780  | 3.16062093  | -0.44949600 |
| C | 3.13624096  | 4.83739185  | -1.53287399 |
| C | 4.00433683  | 5.93244219  | -1.37416005 |
| C | 3.51145101  | 7.22608805  | -1.36200404 |
| C | 2.13083696  | 7.46562815  | -1.49824500 |
| C | 1.25315499  | 6.38106012  | -1.64436102 |
| C | 1.76315403  | 5.08477592  | -1.66090202 |
| C | -1.77298105 | 3.65668392  | 3.38549995  |
| C | -2.53957295 | 4.58646679  | 4.10920095  |
| C | -3.41576910 | 4.16389418  | 5.09701395  |
| C | -3.56844592 | 2.79402804  | 5.37320089  |
| C | -2.81036997 | 1.85767698  | 4.65806484  |
| C | -1.92478001 | 2.29595089  | 3.67639089  |
| C | -1.43554401 | 5.58838511  | 1.24612498  |
| C | -1.22730601 | 6.90826607  | 1.68076801  |
| C | -1.88093996 | 7.96339989  | 1.06532300  |
| C | -2.75241995 | 7.73154306  | -0.01309800 |
| C | -2.96149898 | 6.41923094  | -0.45888200 |
| C | -2.30134797 | 5.36739206  | 0.17155901  |

|   |             |             |             |
|---|-------------|-------------|-------------|
| C | 0.84522003  | 4.88524580  | 2.80992699  |
| C | 1.97605705  | 5.01663589  | 1.99786603  |
| C | 3.10713911  | 5.69991302  | 2.43581200  |
| C | 3.11556792  | 6.27151918  | 3.71634007  |
| C | 1.98649395  | 6.13469982  | 4.54209995  |
| C | 0.86990303  | 5.44253683  | 4.09864378  |
| H | -3.61691999 | -1.85584998 | -2.80768991 |
| H | -4.08665991 | -2.61180592 | -5.09149694 |
| O | -5.15741396 | -5.04476595 | -5.67768717 |
| H | -5.48290300 | -6.39462709 | -3.56440306 |
| H | -4.97738314 | -5.63986683 | -1.23988199 |
| H | -4.57619810 | -0.35669401 | 0.71315098  |
| H | -6.57635593 | 0.68116897  | 1.68480599  |
| O | -8.89255238 | -0.69125402 | 2.16158509  |
| H | -8.70691967 | -3.05236197 | 1.28374803  |
| H | -6.68822289 | -4.09110022 | 0.26375300  |
| H | -4.97160482 | -4.04876900 | 2.40232706  |
| H | -4.08327198 | -5.72073317 | 3.95056391  |
| O | -1.86570501 | -7.22753286 | 3.43727398  |
| H | -0.96217602 | -6.68949318 | 1.12369096  |
| H | -1.83781195 | -4.96696091 | -0.42168301 |
| H | -0.66987401 | -4.95721388 | 3.83872199  |
| H | 0.57307398  | -6.83646822 | 4.87003994  |
| O | 2.66708589  | -6.65069199 | 6.28423691  |
| H | 3.40015507  | -4.03345203 | 6.54211092  |
| H | 2.17753601  | -2.18088603 | 5.51351595  |
| H | -2.73362589 | -1.27861202 | 2.53741193  |
| H | -5.06070089 | -1.25808704 | 3.32369399  |
| O | -5.84713507 | -2.21640706 | 5.74324179  |
| H | -3.85660291 | -3.14519596 | 7.00686979  |
| H | -1.49501204 | -3.16954708 | 6.21428680  |
| H | 1.16284001  | 0.13296001  | 2.46562195  |
| H | 2.28259611  | 2.12327909  | 3.35070610  |
| O | 2.39606595  | 2.73127794  | 6.00215101  |
| H | 0.92452502  | 1.14321601  | 7.32168388  |
| H | -0.22430700 | -0.87513399 | 6.42783785  |
| H | -6.37347412 | 0.30343699  | -1.21758699 |
| H | -7.44795179 | -1.39242196 | -2.59968209 |
| O | -6.93058491 | -1.72622299 | -5.25832510 |
| H | -5.29672098 | 0.03925500  | -6.05287695 |
| H | -4.19484186 | 1.76668000  | -4.64749193 |
| H | -1.75365102 | 3.47927690  | -2.68691802 |
| H | -1.25769699 | 5.48161602  | -3.98982310 |
| O | -3.17618704 | 7.21917391  | -4.87408781 |
| H | -5.47243977 | 6.36460876  | -4.26710176 |
| H | -5.98376322 | 4.30846119  | -2.97331309 |
| H | -3.63373399 | 2.52413201  | 1.06219995  |
| H | -4.93627405 | 3.18990707  | 3.01628089  |
| O | -7.60656023 | 3.76794791  | 2.91919398  |
| H | -8.44491863 | 3.62456393  | 0.53754097  |
| H | -7.12457180 | 2.93785310  | -1.44928598 |
| H | 2.52688503  | -4.14939594 | -5.59821510 |
| H | 4.92156601  | -4.33319998 | -6.11109591 |
| O | 6.87014580  | -3.03755403 | -4.68536186 |

|   |             |             |             |
|---|-------------|-------------|-------------|
| H | 5.84769487  | -1.83053303 | -2.72452903 |
| H | 3.43018889  | -1.65682304 | -2.19161391 |
| H | -1.32255101 | -0.87292099 | -3.55469990 |
| H | -1.66707206 | 1.53600895  | -4.00497389 |
| O | 0.14496601  | 3.23888707  | -4.58366203 |
| H | 2.53983903  | 1.97136497  | -4.87267208 |
| H | 2.86578202  | -0.40750700 | -4.50885391 |
| H | 0.52270502  | -2.55515194 | -6.40222406 |
| H | -0.80847800 | -4.04205990 | -7.84114695 |
| O | -2.26820588 | -6.13815403 | -6.89310694 |
| H | -2.09287190 | -6.26859522 | -4.37901020 |
| H | -0.72153401 | -4.77134800 | -2.92024589 |
| H | 6.38805008  | -4.13274288 | 0.17073201  |
| H | 8.47316933  | -3.74711609 | -1.13329101 |
| O | 9.28538990  | -1.53421402 | -2.03597212 |
| H | 7.57215023  | 0.46902701  | -1.31778598 |
| H | 5.50546980  | 0.08803600  | -0.05679200 |
| H | 5.70656109  | -4.02216101 | 2.95211601  |
| H | 6.16883516  | -3.82700801 | 5.39008904  |
| O | 5.39546108  | -1.97024000 | 6.91468382  |
| H | 4.11920595  | -0.02985800 | 5.47556877  |
| H | 3.69062805  | -0.21672100 | 3.06130195  |
| H | 2.65695000  | -4.04448795 | 2.74787998  |
| H | 1.20914805  | -5.94461679 | 2.12742710  |
| O | 0.98797899  | -6.98852015 | -0.17666601 |
| H | 2.77849793  | -5.84013987 | -1.89350200 |
| H | 4.22492218  | -3.97546196 | -1.28220201 |
| H | 4.58502007  | 4.73162603  | -3.89894700 |
| H | 5.71584606  | 4.00608015  | -6.00097704 |
| O | 6.46970081  | 1.65365398  | -6.55970478 |
| H | 5.87252617  | -0.04078200 | -4.51234198 |
| H | 4.73095989  | 0.66248000  | -2.46555996 |
| H | 3.54504800  | 2.36339808  | 1.29677200  |
| H | 5.21040106  | 1.89138198  | 3.03706503  |
| O | 7.89299393  | 2.13491201  | 2.65194702  |
| H | 8.37005424  | 3.02442098  | 0.33441001  |
| H | 6.68352079  | 3.48300409  | -1.44159305 |
| H | 5.07807112  | 5.76694107  | -1.24734402 |
| H | 4.17153597  | 8.08723736  | -1.24120605 |
| O | 1.75450897  | 8.74721527  | -1.47048795 |
| H | 0.17414400  | 6.52820683  | -1.71162903 |
| H | 1.06844294  | 4.24268389  | -1.74973094 |
| H | -2.46671891 | 5.65372610  | 3.88367295  |
| H | -4.01208496 | 4.87764883  | 5.66885996  |
| O | -4.47879124 | 2.47566104  | 6.30674601  |
| H | -2.91114497 | 0.78699899  | 4.83734179  |
| H | -1.35398901 | 1.55050004  | 3.11568499  |
| H | -0.53626198 | 7.11670113  | 2.50125504  |
| H | -1.73130596 | 8.99316692  | 1.39612997  |
| O | -3.30778599 | 8.81941128  | -0.56250203 |
| H | -3.62045002 | 6.20318317  | -1.29972196 |
| H | -2.45685101 | 4.35042715  | -0.19720300 |
| H | 1.97640097  | 4.58355999  | 0.99398702  |
| H | 3.96852493  | 5.77221489  | 1.77183497  |

|   |             |             |             |
|---|-------------|-------------|-------------|
| O | 4.15993404  | 6.92282677  | 4.24505281  |
| H | 2.02285695  | 6.56984615  | 5.54262781  |
| H | 0.00961600  | 5.33260012  | 4.76342821  |
| C | -4.98961306 | -4.22516823 | -6.80867004 |
| H | -5.59661818 | -3.30710506 | -6.73315811 |
| H | -3.93196201 | -3.94547701 | -6.95129824 |
| H | -5.32277822 | -4.81508589 | -7.67131090 |
| C | -8.97024822 | 0.65751600  | 2.55582905  |
| H | -8.20458412 | 0.91017002  | 3.30991697  |
| H | -8.85065746 | 1.33766997  | 1.69767702  |
| H | -9.96451092 | 0.79906398  | 2.99559999  |
| C | -2.43107891 | -7.49980688 | 4.69584894  |
| H | -2.43626595 | -6.60366488 | 5.34114122  |
| H | -3.46067190 | -7.88552618 | 4.60376406  |
| H | -1.80387795 | -8.27013206 | 5.16121006  |
| C | -6.92818594 | -1.82365799 | 4.93438721  |
| H | -6.99455023 | -2.43255401 | 4.01686811  |
| H | -7.83679295 | -1.96913099 | 5.53071880  |
| H | -6.85887718 | -0.76077801 | 4.64174604  |
| C | 3.49844098  | 3.28300905  | 5.32464218  |
| H | 3.22546291  | 3.71312189  | 4.35076714  |
| H | 3.89374304  | 4.08627510  | 5.95784187  |
| H | 4.28257084  | 2.51866102  | 5.17255592  |
| C | 3.84396410  | -6.49005508 | 7.03536606  |
| H | 4.64261198  | -6.01316214 | 6.44079018  |
| H | 3.66879392  | -5.89117479 | 7.94573593  |
| H | 4.16837597  | -7.49603224 | 7.32775021  |
| C | -7.81734800 | -2.69342995 | -4.74692392 |
| H | -8.74733734 | -2.23132801 | -4.37483788 |
| H | -8.06067181 | -3.36511898 | -5.57920218 |
| H | -7.34939384 | -3.28135109 | -3.93896198 |
| C | -7.06054211 | 3.93672800  | 4.20643616  |
| H | -6.29395819 | 4.72932386  | 4.21719503  |
| H | -7.89031792 | 4.22840595  | 4.86125612  |
| H | -6.60669613 | 3.00739908  | 4.59180403  |
| C | -1.88259697 | 7.60500479  | -5.26314211 |
| H | -1.22924805 | 7.77893400  | -4.38983202 |
| H | -1.41407502 | 6.84938383  | -5.91696119 |
| H | -1.98935497 | 8.54328060  | -5.82072687 |
| C | -2.24996710 | -6.09854889 | -8.29812241 |
| H | -1.23081803 | -6.24609518 | -8.69444275 |
| H | -2.89001203 | -6.92061710 | -8.64072037 |
| H | -2.65287495 | -5.14805698 | -8.68887615 |
| C | 7.40406418  | -3.79034209 | -5.74587011 |
| H | 7.18358517  | -4.86556482 | -5.63319778 |
| H | 7.02279615  | -3.44653893 | -6.72356796 |
| H | 8.49088860  | -3.64574409 | -5.71467304 |
| C | 1.17126000  | 4.07888699  | -5.05156183 |
| H | 1.53866506  | 3.75705600  | -6.04066992 |
| H | 0.74079502  | 5.08448076  | -5.14161301 |
| H | 2.01914907  | 4.12150288  | -4.34845304 |
| C | 4.94517517  | -0.90421402 | 7.71397209  |
| H | 3.84929204  | -0.78361702 | 7.65233183  |
| H | 5.22246408  | -1.14801598 | 8.74652386  |

|   |             |             |             |
|---|-------------|-------------|-------------|
| H | 5.42589808  | 0.04795600  | 7.42998600  |
| C | 9.66081619  | -0.28453001 | -2.55592799 |
| H | 8.88895321  | 0.12035600  | -3.23470211 |
| H | 9.85497379  | 0.45031399  | -1.75546706 |
| H | 10.58724976 | -0.44582701 | -3.12043405 |
| C | 0.93022901  | -7.54306507 | -1.46711504 |
| H | 0.66713399  | -6.78530216 | -2.22588801 |
| H | 1.88635802  | -8.01597691 | -1.74865603 |
| H | 0.14741200  | -8.31109810 | -1.44197094 |
| C | 0.39349601  | 9.07285500  | -1.61109304 |
| H | -0.21592800 | 8.63782692  | -0.80321097 |
| H | 0.32678300  | 10.16622066 | -1.56395400 |
| H | -0.00403400 | 8.73237801  | -2.58348489 |
| C | 6.83545494  | 0.32148299  | -6.82035780 |
| H | 5.95654583  | -0.34729901 | -6.82889795 |
| H | 7.30100679  | 0.31502801  | -7.81335020 |
| H | 7.56112909  | -0.05882100 | -6.08008909 |
| C | 7.57210779  | 1.53180695  | 3.88152194  |
| H | 7.02828693  | 0.58165503  | 3.73930097  |
| H | 8.52389240  | 1.33036697  | 4.38767099  |
| H | 6.96642923  | 2.20146108  | 4.51791477  |
| C | -4.21842289 | 8.67201138  | -1.62571800 |
| H | -3.73755503 | 8.25230312  | -2.52524400 |
| H | -5.07097387 | 8.03065586  | -1.34475696 |
| H | -4.58966684 | 9.67763710  | -1.85755002 |
| C | -4.66870785 | 1.12221503  | 6.64346218  |
| H | -5.03327703 | 0.53654802  | 5.78313589  |
| H | -3.73923993 | 0.65768498  | 7.01362085  |
| H | -5.42235088 | 1.09946096  | 7.43965101  |
| C | 5.32120895  | 7.09819317  | 3.47130895  |
| H | 5.77638102  | 6.13063717  | 3.19486403  |
| H | 5.11379385  | 7.67229891  | 2.55189204  |
| H | 6.02779007  | 7.66213512  | 4.09211779  |

$D_2 \text{Au}_9(\text{PR}_3)_8^{3+}$ , R=Ph

|    |             |             |             |
|----|-------------|-------------|-------------|
| Au | -1.37622702 | 2.35440612  | 0.23703200  |
| Au | -2.32384610 | -0.14821599 | 1.38391495  |
| Au | 0.00000000  | 0.00000000  | 0.00000000  |
| Au | 1.37622702  | 2.35440612  | -0.23703200 |
| Au | 1.37622702  | -2.35440612 | 0.23703200  |
| Au | -1.37622702 | -2.35440612 | -0.23703200 |
| Au | 2.32384610  | -0.14821599 | -1.38391495 |
| Au | -2.32384610 | 0.14821599  | -1.38391495 |
| Au | 2.32384610  | 0.14821599  | 1.38391495  |
| P  | -2.77770710 | 4.20048523  | 0.48174801  |
| P  | -3.31399608 | -0.21790101 | 3.46369410  |
| P  | 2.77770710  | 4.20048523  | -0.48174801 |
| P  | 2.77770710  | -4.20048523 | 0.48174801  |
| P  | -2.77770710 | -4.20048523 | -0.48174801 |
| P  | 3.31399608  | -0.21790101 | -3.46369410 |
| P  | 3.31399608  | 0.21790101  | 3.46369410  |
| P  | -3.31399608 | 0.21790101  | -3.46369410 |

|   |             |             |             |
|---|-------------|-------------|-------------|
| C | -3.10574698 | 4.64157104  | 2.21926999  |
| C | -2.13828611 | 4.34003210  | 3.18660903  |
| H | -1.22967696 | 3.80482292  | 2.89702106  |
| C | -2.34097791 | 4.69622898  | 4.51847219  |
| H | -1.58983505 | 4.43908024  | 5.26855087  |
| C | -3.51011395 | 5.36031294  | 4.89104891  |
| H | -3.66930699 | 5.64326000  | 5.93423605  |
| C | -4.48183823 | 5.65432310  | 3.93293095  |
| H | -5.39998198 | 6.16976023  | 4.22522306  |
| C | -4.28857183 | 5.28809977  | 2.60233808  |
| H | -5.06727982 | 5.49332714  | 1.86283398  |
| C | -4.41573715 | 3.85150909  | -0.23317400 |
| C | -5.13601494 | 2.76726508  | 0.29321101  |
| H | -4.72653294 | 2.17674088  | 1.11854100  |
| C | -6.38962603 | 2.45241809  | -0.22178400 |
| H | -6.95046806 | 1.62047100  | 0.20940900  |
| C | -6.92212009 | 3.19719005  | -1.27735996 |
| H | -7.90863705 | 2.95211411  | -1.67867899 |
| C | -6.19567919 | 4.25563622  | -1.81947100 |
| H | -6.60525703 | 4.83509684  | -2.64971995 |
| C | -4.94568300 | 4.58865404  | -1.29651701 |
| H | -4.38632107 | 5.42612219  | -1.71828401 |
| C | -2.14448810 | 5.70441008  | -0.32572699 |
| C | -1.06957102 | 5.58736897  | -1.21572697 |
| H | -0.62665898 | 4.60321808  | -1.39843798 |
| C | -0.53911000 | 6.71759415  | -1.83399904 |
| H | 0.31087899  | 6.61618280  | -2.51334095 |
| C | -1.07874405 | 7.97394609  | -1.56223905 |
| H | -0.65868002 | 8.86348438  | -2.03733611 |
| C | -2.14840889 | 8.09887695  | -0.67371899 |
| H | -2.56742811 | 9.08410835  | -0.45681801 |
| C | -2.68011403 | 6.97057104  | -0.05413900 |
| H | -3.50575590 | 7.08268976  | 0.65270501  |
| C | -4.92578697 | 0.61874801  | 3.51550794  |
| C | -5.06601000 | 1.90759099  | 4.04343605  |
| H | -4.21051121 | 2.42402792  | 4.48616123  |
| C | -6.30954504 | 2.53811193  | 4.00098419  |
| H | -6.41627407 | 3.54001093  | 4.42076492  |
| C | -7.40811586 | 1.89511096  | 3.43392706  |
| H | -8.38083839 | 2.39173794  | 3.41203499  |
| C | -7.26423502 | 0.61424798  | 2.89637208  |
| H | -8.12443924 | 0.10465200  | 2.45485592  |
| C | -6.02707577 | -0.02202400 | 2.92858791  |
| H | -5.91872311 | -1.02349496 | 2.50470996  |
| C | -2.27197909 | 0.57805800  | 4.72971296  |
| C | -2.64243698 | 0.52261800  | 6.08134794  |
| H | -3.56494188 | 0.01975600  | 6.38174582  |
| C | -1.83086598 | 1.10236597  | 7.05124187  |
| H | -2.12320590 | 1.05426800  | 8.10265732  |
| C | -0.64254099 | 1.73650396  | 6.68102884  |
| H | 0.00026700  | 2.17983508  | 7.44511890  |
| C | -0.27204999 | 1.79731500  | 5.33993912  |
| H | 0.66255301  | 2.28348398  | 5.05240583  |
| C | -1.08370495 | 1.21995199  | 4.36385822  |

|   |             |             |             |
|---|-------------|-------------|-------------|
| H | -0.78279901 | 1.25306106  | 3.31175399  |
| C | -3.59758592 | -1.92528105 | 4.03909492  |
| C | -4.59932280 | -2.23277712 | 4.96965981  |
| H | -5.28775215 | -1.45782399 | 5.31664801  |
| C | -4.73139906 | -3.53575110 | 5.44621897  |
| H | -5.51441479 | -3.76979709 | 6.17120218  |
| C | -3.86611009 | -4.53629208 | 5.00257921  |
| H | -3.97065711 | -5.55544996 | 5.38230515  |
| C | -2.87721992 | -4.23871994 | 4.06500912  |
| H | -2.21408010 | -5.02509785 | 3.69690895  |
| C | -2.74907207 | -2.94035006 | 3.57595205  |
| H | -1.99168205 | -2.71119404 | 2.81871390  |
| C | 3.10574698  | 4.64157104  | -2.21926999 |
| C | 3.10574698  | -4.64157104 | 2.21926999  |
| C | -3.10574698 | -4.64157104 | -2.21926999 |
| C | 2.13828611  | 4.34003210  | -3.18660903 |
| C | 2.13828611  | -4.34003210 | 3.18660903  |
| C | -2.13828611 | -4.34003210 | -3.18660903 |
| H | 1.22967696  | 3.80482292  | -2.89702106 |
| H | 1.22967696  | -3.80482292 | 2.89702106  |
| H | -1.22967696 | -3.80482292 | -2.89702106 |
| C | 2.34097791  | 4.69622898  | -4.51847219 |
| C | 2.34097791  | -4.69622898 | 4.51847219  |
| C | -2.34097791 | -4.69622898 | -4.51847219 |
| H | 1.58983505  | 4.43908024  | -5.26855087 |
| H | 1.58983505  | -4.43908024 | 5.26855087  |
| H | -1.58983505 | -4.43908024 | -5.26855087 |
| C | 3.51011395  | 5.36031294  | -4.89104891 |
| C | 3.51011395  | -5.36031294 | 4.89104891  |
| C | -3.51011395 | -5.36031294 | -4.89104891 |
| H | 3.66930699  | 5.64326000  | -5.93423605 |
| H | 3.66930699  | -5.64326000 | 5.93423605  |
| H | -3.66930699 | -5.64326000 | -5.93423605 |
| C | 4.48183823  | 5.65432310  | -3.93293095 |
| C | 4.48183823  | -5.65432310 | 3.93293095  |
| C | -4.48183823 | -5.65432310 | -3.93293095 |
| H | 5.39998198  | 6.16976023  | -4.22522306 |
| H | 5.39998198  | -6.16976023 | 4.22522306  |
| H | -5.39998198 | -6.16976023 | -4.22522306 |
| C | 4.28857183  | 5.28809977  | -2.60233808 |
| C | 4.28857183  | -5.28809977 | 2.60233808  |
| C | -4.28857183 | -5.28809977 | -2.60233808 |
| H | 5.06727982  | 5.49332714  | -1.86283398 |
| H | 5.06727982  | -5.49332714 | 1.86283398  |
| H | -5.06727982 | -5.49332714 | -1.86283398 |
| C | 4.41573715  | 3.85150909  | 0.23317400  |
| C | 4.41573715  | -3.85150909 | -0.23317400 |
| C | -4.41573715 | -3.85150909 | 0.23317400  |
| C | 5.13601494  | 2.76726508  | -0.29321101 |
| C | 5.13601494  | -2.76726508 | 0.29321101  |
| C | -5.13601494 | -2.76726508 | -0.29321101 |
| H | 4.72653294  | 2.17674088  | -1.11854100 |
| H | 4.72653294  | -2.17674088 | 1.11854100  |
| H | -4.72653294 | -2.17674088 | -1.11854100 |

|   |             |             |             |
|---|-------------|-------------|-------------|
| C | 6.38962603  | 2.45241809  | 0.22178400  |
| C | 6.38962603  | -2.45241809 | -0.22178400 |
| C | -6.38962603 | -2.45241809 | 0.22178400  |
| H | 6.95046806  | 1.62047100  | -0.20940900 |
| H | 6.95046806  | -1.62047100 | 0.20940900  |
| H | -6.95046806 | -1.62047100 | -0.20940900 |
| C | 6.92212009  | 3.19719005  | 1.27735996  |
| C | 6.92212009  | -3.19719005 | -1.27735996 |
| C | -6.92212009 | -3.19719005 | 1.27735996  |
| H | 7.90863705  | 2.95211411  | 1.67867899  |
| H | 7.90863705  | -2.95211411 | -1.67867899 |
| H | -7.90863705 | -2.95211411 | 1.67867899  |
| C | 6.19567919  | 4.25563622  | 1.81947100  |
| C | 6.19567919  | -4.25563622 | -1.81947100 |
| C | -6.19567919 | -4.25563622 | 1.81947100  |
| H | 6.60525703  | 4.83509684  | 2.64971995  |
| H | 6.60525703  | -4.83509684 | -2.64971995 |
| H | -6.60525703 | -4.83509684 | 2.64971995  |
| C | 4.94568300  | 4.58865404  | 1.29651701  |
| C | 4.94568300  | -4.58865404 | -1.29651701 |
| C | -4.94568300 | -4.58865404 | 1.29651701  |
| H | 4.38632107  | 5.42612219  | 1.71828401  |
| H | 4.38632107  | -5.42612219 | -1.71828401 |
| H | -4.38632107 | -5.42612219 | 1.71828401  |
| C | 2.14448810  | 5.70441008  | 0.32572699  |
| C | 2.14448810  | -5.70441008 | -0.32572699 |
| C | -2.14448810 | -5.70441008 | 0.32572699  |
| C | 1.06957102  | 5.58736897  | 1.21572697  |
| C | 1.06957102  | -5.58736897 | -1.21572697 |
| C | -1.06957102 | -5.58736897 | 1.21572697  |
| H | 0.62665898  | 4.60321808  | 1.39843798  |
| H | 0.62665898  | -4.60321808 | -1.39843798 |
| H | -0.62665898 | -4.60321808 | 1.39843798  |
| C | 0.53911000  | 6.71759415  | 1.83399904  |
| C | 0.53911000  | -6.71759415 | -1.83399904 |
| C | -0.53911000 | -6.71759415 | 1.83399904  |
| H | -0.31087899 | 6.61618280  | 2.51334095  |
| H | -0.31087899 | -6.61618280 | -2.51334095 |
| H | 0.31087899  | -6.61618280 | 2.51334095  |
| C | 1.07874405  | 7.97394609  | 1.56223905  |
| C | 1.07874405  | -7.97394609 | -1.56223905 |
| C | -1.07874405 | -7.97394609 | 1.56223905  |
| H | 0.65868002  | 8.86348438  | 2.03733611  |
| H | 0.65868002  | -8.86348438 | -2.03733611 |
| H | -0.65868002 | -8.86348438 | 2.03733611  |
| C | 2.14840889  | 8.09887695  | 0.67371899  |
| C | 2.14840889  | -8.09887695 | -0.67371899 |
| C | -2.14840889 | -8.09887695 | 0.67371899  |
| H | 2.56742811  | 9.08410835  | 0.45681801  |
| H | 2.56742811  | -9.08410835 | -0.45681801 |
| H | -2.56742811 | -9.08410835 | 0.45681801  |
| C | 2.68011403  | 6.97057104  | 0.05413900  |
| C | 2.68011403  | -6.97057104 | -0.05413900 |
| C | -2.68011403 | -6.97057104 | 0.05413900  |



|   |             |             |             |
|---|-------------|-------------|-------------|
| H | 3.50575590  | 7.08268976  | -0.65270501 |
| H | 3.50575590  | -7.08268976 | 0.65270501  |
| H | -3.50575590 | -7.08268976 | -0.65270501 |
| C | 4.92578697  | 0.61874801  | -3.51550794 |
| C | 4.92578697  | -0.61874801 | 3.51550794  |
| C | -4.92578697 | -0.61874801 | -3.51550794 |
| C | 5.06601000  | 1.90759099  | -4.04343605 |
| C | 5.06601000  | -1.90759099 | 4.04343605  |
| C | -5.06601000 | -1.90759099 | -4.04343605 |
| H | 4.21051121  | 2.42402792  | -4.48616123 |
| H | 4.21051121  | -2.42402792 | 4.48616123  |
| H | -4.21051121 | -2.42402792 | -4.48616123 |
| C | 6.30954504  | 2.53811193  | -4.00098419 |
| C | 6.30954504  | -2.53811193 | 4.00098419  |
| C | -6.30954504 | -2.53811193 | -4.00098419 |
| H | 6.41627407  | 3.54001093  | -4.42076492 |
| H | 6.41627407  | -3.54001093 | 4.42076492  |
| H | -6.41627407 | -3.54001093 | -4.42076492 |
| C | 7.40811586  | 1.89511096  | -3.43392706 |
| C | 7.40811586  | -1.89511096 | 3.43392706  |
| C | -7.40811586 | -1.89511096 | -3.43392706 |
| H | 8.38083839  | 2.39173794  | -3.41203499 |
| H | 8.38083839  | -2.39173794 | 3.41203499  |
| H | -8.38083839 | -2.39173794 | -3.41203499 |
| C | 7.26423502  | 0.61424798  | -2.89637208 |
| C | 7.26423502  | -0.61424798 | 2.89637208  |
| C | -7.26423502 | -0.61424798 | -2.89637208 |
| H | 8.12443924  | 0.10465200  | -2.45485592 |
| H | 8.12443924  | -0.10465200 | 2.45485592  |
| H | -8.12443924 | -0.10465200 | -2.45485592 |
| C | 6.02707577  | -0.02202400 | -2.92858791 |
| C | 6.02707577  | 0.02202400  | 2.92858791  |
| C | -6.02707577 | 0.02202400  | -2.92858791 |
| H | 5.91872311  | -1.02349496 | -2.50470996 |
| H | 5.91872311  | 1.02349496  | 2.50470996  |
| H | -5.91872311 | 1.02349496  | -2.50470996 |
| C | 2.27197909  | 0.57805800  | -4.72971296 |
| C | 2.27197909  | -0.57805800 | 4.72971296  |
| C | -2.27197909 | -0.57805800 | -4.72971296 |
| C | 2.64243698  | 0.52261800  | -6.08134794 |
| C | 2.64243698  | -0.52261800 | 6.08134794  |
| C | -2.64243698 | -0.52261800 | -6.08134794 |
| H | 3.56494188  | 0.01975600  | -6.38174582 |
| H | 3.56494188  | -0.01975600 | 6.38174582  |
| H | -3.56494188 | -0.01975600 | -6.38174582 |
| C | 1.83086598  | 1.10236597  | -7.05124187 |
| C | 1.83086598  | -1.10236597 | 7.05124187  |
| C | -1.83086598 | -1.10236597 | -7.05124187 |
| H | 2.12320590  | 1.05426800  | -8.10265732 |
| H | 2.12320590  | -1.05426800 | 8.10265732  |
| H | -2.12320590 | -1.05426800 | -8.10265732 |
| C | 0.64254099  | 1.73650396  | -6.68102884 |
| C | 0.64254099  | -1.73650396 | 6.68102884  |
| C | -0.64254099 | -1.73650396 | -6.68102884 |

|   |             |             |             |
|---|-------------|-------------|-------------|
| H | -0.00026700 | 2.17983508  | -7.44511890 |
| H | -0.00026700 | -2.17983508 | 7.44511890  |
| H | 0.00026700  | -2.17983508 | -7.44511890 |
| C | 0.27204999  | 1.79731500  | -5.33993912 |
| C | 0.27204999  | -1.79731500 | 5.33993912  |
| C | -0.27204999 | -1.79731500 | -5.33993912 |
| H | -0.66255301 | 2.28348398  | -5.05240583 |
| H | -0.66255301 | -2.28348398 | 5.05240583  |
| H | 0.66255301  | -2.28348398 | -5.05240583 |
| C | 1.08370495  | 1.21995199  | -4.36385822 |
| C | 1.08370495  | -1.21995199 | 4.36385822  |
| C | -1.08370495 | -1.21995199 | -4.36385822 |
| H | 0.78279901  | 1.25306106  | -3.31175399 |
| H | 0.78279901  | -1.25306106 | 3.31175399  |
| H | -0.78279901 | -1.25306106 | -3.31175399 |
| C | 3.59758592  | -1.92528105 | -4.03909492 |
| C | 3.59758592  | 1.92528105  | 4.03909492  |
| C | -3.59758592 | 1.92528105  | -4.03909492 |
| C | 4.59932280  | -2.23277712 | -4.96965981 |
| C | 4.59932280  | 2.23277712  | 4.96965981  |
| C | -4.59932280 | 2.23277712  | -4.96965981 |
| H | 5.28775215  | -1.45782399 | -5.31664801 |
| H | 5.28775215  | 1.45782399  | 5.31664801  |
| H | -5.28775215 | 1.45782399  | -5.31664801 |
| C | 4.73139906  | -3.53575110 | -5.44621897 |
| C | 4.73139906  | 3.53575110  | 5.44621897  |
| C | -4.73139906 | 3.53575110  | -5.44621897 |
| H | 5.51441479  | -3.76979709 | -6.17120218 |
| H | 5.51441479  | 3.76979709  | 6.17120218  |
| H | -5.51441479 | 3.76979709  | -6.17120218 |
| C | 3.86611009  | -4.53629208 | -5.00257921 |
| C | 3.86611009  | 4.53629208  | 5.00257921  |
| C | -3.86611009 | 4.53629208  | -5.00257921 |
| H | 3.97065711  | -5.55544996 | -5.38230515 |
| H | 3.97065711  | 5.55544996  | 5.38230515  |
| H | -3.97065711 | 5.55544996  | -5.38230515 |
| C | 2.87721992  | -4.23871994 | -4.06500912 |
| C | 2.87721992  | 4.23871994  | 4.06500912  |
| C | -2.87721992 | 4.23871994  | -4.06500912 |
| H | 2.21408010  | -5.02509785 | -3.69690895 |
| H | 2.21408010  | 5.02509785  | 3.69690895  |
| H | -2.21408010 | 5.02509785  | -3.69690895 |
| C | 2.74907207  | -2.94035006 | -3.57595205 |
| C | 2.74907207  | 2.94035006  | 3.57595205  |
| C | -2.74907207 | 2.94035006  | -3.57595205 |
| H | 1.99168205  | -2.71119404 | -2.81871390 |
| H | 1.99168205  | 2.71119404  | 2.81871390  |
| H | -1.99168205 | 2.71119404  | -2.81871390 |

C<sub>4</sub> Au<sub>9</sub>(PR<sub>3</sub>)<sub>8</sub><sup>3+</sup>, R=Ph

|    |             |             |             |
|----|-------------|-------------|-------------|
| Au | 0.00000000  | 0.00000000  | 0.00597600  |
| Au | 2.47794294  | -0.12079100 | -1.06207097 |
| Au | 1.84302604  | 1.67889798  | 1.05022001  |
| Au | -2.47794294 | 0.12079100  | -1.06207097 |
| Au | -1.84302604 | -1.67889798 | 1.05022001  |
| Au | 0.12079100  | 2.47794294  | -1.06207097 |
| Au | -1.67889798 | 1.84302604  | 1.05022001  |
| Au | -0.12079100 | -2.47794294 | -1.06207097 |
| Au | 1.67889798  | -1.84302604 | 1.05022001  |
| P  | 4.16405392  | 0.11474300  | -2.62245893 |
| P  | 2.78155303  | 3.09612012  | 2.61478209  |
| P  | -4.16405392 | -0.11474300 | -2.62245893 |
| P  | -2.78155303 | -3.09612012 | 2.61478209  |
| P  | -0.11474300 | 4.16405392  | -2.62245893 |
| P  | -3.09612012 | 2.78155303  | 2.61478209  |
| P  | 0.11474300  | -4.16405392 | -2.62245893 |
| P  | 3.09612012  | -2.78155303 | 2.61478209  |
| C  | 4.47628307  | 1.88483202  | -2.90876102 |
| C  | 4.65653992  | 2.68760109  | -1.77205300 |
| H  | 4.57784414  | 2.25146604  | -0.77228802 |
| C  | 4.94758177  | 4.04070282  | -1.91003299 |
| H  | 5.11442423  | 4.64661503  | -1.01580405 |
| C  | 5.01729488  | 4.61170292  | -3.18322301 |
| H  | 5.23141098  | 5.67722988  | -3.29448390 |
| C  | 4.80867910  | 3.82315302  | -4.31316185 |
| H  | 4.85415411  | 4.26919603  | -5.30906677 |
| C  | 4.55129099  | 2.45780206  | -4.18131685 |
| H  | 4.40592384  | 1.84438598  | -5.07257509 |
| C  | 3.82315302  | -0.65242398 | -4.23603201 |
| C  | 2.50985694  | -0.99782097 | -4.57725286 |
| H  | 1.70326602  | -0.84987903 | -3.85222101 |
| C  | 2.23455000  | -1.54304600 | -5.83068180 |
| H  | 1.20862401  | -1.81384599 | -6.08984900 |
| C  | 3.26925898  | -1.75698197 | -6.74098492 |
| H  | 3.05296707  | -2.18649507 | -7.72217512 |
| C  | 4.58343697  | -1.43609798 | -6.39614916 |
| H  | 5.39587688  | -1.61469495 | -7.10433578 |
| C  | 4.86300278  | -0.88744903 | -5.14668608 |
| H  | 5.89457417  | -0.64518702 | -4.87706614 |
| C  | 5.75853205  | -0.58157802 | -2.08066010 |
| C  | 6.95355892  | 0.14730901  | -2.09928894 |
| H  | 6.96228409  | 1.18483806  | -2.44190311 |
| C  | 8.13934803  | -0.45776901 | -1.67942905 |
| H  | 9.07266808  | 0.10984500  | -1.70013905 |
| C  | 8.13740540  | -1.78268600 | -1.24369705 |
| H  | 9.06891537  | -2.25028396 | -0.91645199 |
| C  | 6.94537020  | -2.50985789 | -1.22673500 |
| H  | 6.93805981  | -3.54648399 | -0.88076299 |
| C  | 5.75910902  | -1.91216898 | -1.64084399 |
| H  | 4.82481813  | -2.48076510 | -1.62321103 |

|   |             |             |             |
|---|-------------|-------------|-------------|
| C | 4.36633778  | 3.83210993  | 2.09438896  |
| C | 4.59517622  | 5.21269417  | 2.06885505  |
| H | 3.80615497  | 5.90946388  | 2.36091590  |
| C | 5.84235811  | 5.70016479  | 1.67349601  |
| H | 6.02238989  | 6.77780294  | 1.66260004  |
| C | 6.85903406  | 4.81892109  | 1.30658996  |
| H | 7.83375883  | 5.20646000  | 1.00133097  |
| C | 6.62944078  | 3.44136906  | 1.33062100  |
| H | 7.42198515  | 2.74759197  | 1.03939497  |
| C | 5.38761711  | 2.94909906  | 1.71931195  |
| H | 5.20809317  | 1.87067103  | 1.73937905  |
| C | 1.67556095  | 4.51355505  | 2.90136790  |
| C | 1.35003400  | 4.99150610  | 4.17400312  |
| H | 1.72116804  | 4.48379087  | 5.06640005  |
| C | 0.54587400  | 6.12446213  | 4.30436420  |
| H | 0.28411400  | 6.48790216  | 5.30046892  |
| C | 0.09228200  | 6.79930592  | 3.17207098  |
| H | -0.52018499 | 7.69729090  | 3.28264308  |
| C | 0.41618899  | 6.32382107  | 1.89912295  |
| H | 0.07312000  | 6.84598780  | 1.00198901  |
| C | 1.18257201  | 5.17046499  | 1.76454604  |
| H | 1.41383100  | 4.79009104  | 0.76639801  |
| C | 3.11176491  | 2.32370090  | 4.22827578  |
| C | 3.99705505  | 2.91847205  | 5.13827085  |
| H | 4.52982378  | 3.83407593  | 4.86745596  |
| C | 4.20300817  | 2.33962011  | 6.38857603  |
| H | 4.89135981  | 2.80754900  | 7.09617996  |
| C | 3.53201008  | 1.16557801  | 6.73515511  |
| H | 3.69520807  | 0.71451098  | 7.71693516  |
| C | 2.66529799  | 0.56005001  | 5.82549191  |
| H | 2.15673399  | -0.37109801 | 6.08532715  |
| C | 2.45966792  | 1.13279295  | 4.57115698  |
| H | 1.79901898  | 0.64676398  | 3.84621596  |
| C | -4.47628307 | -1.88483202 | -2.90876102 |
| C | -4.65653992 | -2.68760109 | -1.77205300 |
| H | -4.57784414 | -2.25146604 | -0.77228802 |
| C | -4.94758177 | -4.04070282 | -1.91003299 |
| H | -5.11442423 | -4.64661503 | -1.01580405 |
| C | -5.01729488 | -4.61170292 | -3.18322301 |
| H | -5.23141098 | -5.67722988 | -3.29448390 |
| C | -4.80867910 | -3.82315302 | -4.31316185 |
| H | -4.85415411 | -4.26919603 | -5.30906677 |
| C | -4.55129099 | -2.45780206 | -4.18131685 |
| H | -4.40592384 | -1.84438598 | -5.07257509 |
| C | -3.82315302 | 0.65242398  | -4.23603201 |
| C | -2.50985694 | 0.99782097  | -4.57725286 |
| H | -1.70326602 | 0.84987903  | -3.85222101 |
| C | -2.23455000 | 1.54304600  | -5.83068180 |
| H | -1.20862401 | 1.81384599  | -6.08984900 |
| C | -3.26925898 | 1.75698197  | -6.74098492 |
| H | -3.05296707 | 2.18649507  | -7.72217512 |
| C | -4.58343697 | 1.43609798  | -6.39614916 |
| H | -5.39587688 | 1.61469495  | -7.10433578 |
| C | -4.86300278 | 0.88744903  | -5.14668608 |

|   |             |             |             |
|---|-------------|-------------|-------------|
| H | -5.89457417 | 0.64518702  | -4.87706614 |
| C | -5.75853205 | 0.58157802  | -2.08066010 |
| C | -6.95355892 | -0.14730901 | -2.09928894 |
| H | -6.96228409 | -1.18483806 | -2.44190311 |
| C | -8.13934803 | 0.45776901  | -1.67942905 |
| H | -9.07266808 | -0.10984500 | -1.70013905 |
| C | -8.13740540 | 1.78268600  | -1.24369705 |
| H | -9.06891537 | 2.25028396  | -0.91645199 |
| C | -6.94537020 | 2.50985789  | -1.22673500 |
| H | -6.93805981 | 3.54648399  | -0.88076299 |
| C | -5.75910902 | 1.91216898  | -1.64084399 |
| H | -4.82481813 | 2.48076510  | -1.62321103 |
| C | -4.36633778 | -3.83210993 | 2.09438896  |
| C | -4.59517622 | -5.21269417 | 2.06885505  |
| H | -3.80615497 | -5.90946388 | 2.36091590  |
| C | -5.84235811 | -5.70016479 | 1.67349601  |
| H | -6.02238989 | -6.77780294 | 1.66260004  |
| C | -6.85903406 | -4.81892109 | 1.30658996  |
| H | -7.83375883 | -5.20646000 | 1.00133097  |
| C | -6.62944078 | -3.44136906 | 1.33062100  |
| H | -7.42198515 | -2.74759197 | 1.03939497  |
| C | -5.38761711 | -2.94909906 | 1.71931195  |
| H | -5.20809317 | -1.87067103 | 1.73937905  |
| C | -1.67556095 | -4.51355505 | 2.90136790  |
| C | -1.35003400 | -4.99150610 | 4.17400312  |
| H | -1.72116804 | -4.48379087 | 5.06640005  |
| C | -0.54587400 | -6.12446213 | 4.30436420  |
| H | -0.28411400 | -6.48790216 | 5.30046892  |
| C | -0.09228200 | -6.79930592 | 3.17207098  |
| H | 0.52018499  | -7.69729090 | 3.28264308  |
| C | -0.41618899 | -6.32382107 | 1.89912295  |
| H | -0.07312000 | -6.84598780 | 1.00198901  |
| C | -1.18257201 | -5.17046499 | 1.76454604  |
| H | -1.41383100 | -4.79009104 | 0.76639801  |
| C | -3.11176491 | -2.32370090 | 4.22827578  |
| C | -3.99705505 | -2.91847205 | 5.13827085  |
| H | -4.52982378 | -3.83407593 | 4.86745596  |
| C | -4.20300817 | -2.33962011 | 6.38857603  |
| H | -4.89135981 | -2.80754900 | 7.09617996  |
| C | -3.53201008 | -1.16557801 | 6.73515511  |
| H | -3.69520807 | -0.71451098 | 7.71693516  |
| C | -2.66529799 | -0.56005001 | 5.82549191  |
| H | -2.15673399 | 0.37109801  | 6.08532715  |
| C | -2.45966792 | -1.13279295 | 4.57115698  |
| H | -1.79901898 | -0.64676398 | 3.84621596  |
| C | -1.88483202 | 4.47628307  | -2.90876102 |
| C | -2.68760109 | 4.65653992  | -1.77205300 |
| H | -2.25146604 | 4.57784414  | -0.77228802 |
| C | -4.04070282 | 4.94758177  | -1.91003299 |
| H | -4.64661503 | 5.11442423  | -1.01580405 |
| C | -4.61170292 | 5.01729488  | -3.18322301 |
| H | -5.67722988 | 5.23141098  | -3.29448390 |
| C | -3.82315302 | 4.80867910  | -4.31316185 |
| H | -4.26919603 | 4.85415411  | -5.30906677 |

|   |             |             |             |
|---|-------------|-------------|-------------|
| C | -2.45780206 | 4.55129099  | -4.18131685 |
| H | -1.84438598 | 4.40592384  | -5.07257509 |
| C | 0.65242398  | 3.82315302  | -4.23603201 |
| C | 0.99782097  | 2.50985694  | -4.57725286 |
| H | 0.84987903  | 1.70326602  | -3.85222101 |
| C | 1.54304600  | 2.23455000  | -5.83068180 |
| H | 1.81384599  | 1.20862401  | -6.08984900 |
| C | 1.75698197  | 3.26925898  | -6.74098492 |
| H | 2.18649507  | 3.05296707  | -7.72217512 |
| C | 1.43609798  | 4.58343697  | -6.39614916 |
| H | 1.61469495  | 5.39587688  | -7.10433578 |
| C | 0.88744903  | 4.86300278  | -5.14668608 |
| H | 0.64518702  | 5.89457417  | -4.87706614 |
| C | 0.58157802  | 5.75853205  | -2.08066010 |
| C | -0.14730901 | 6.95355892  | -2.09928894 |
| H | -1.18483806 | 6.96228409  | -2.44190311 |
| C | 0.45776901  | 8.13934803  | -1.67942905 |
| H | -0.10984500 | 9.07266808  | -1.70013905 |
| C | 1.78268600  | 8.13740540  | -1.24369705 |
| H | 2.25028396  | 9.06891537  | -0.91645199 |
| C | 2.50985789  | 6.94537020  | -1.22673500 |
| H | 3.54648399  | 6.93805981  | -0.88076299 |
| C | 1.91216898  | 5.75910902  | -1.64084399 |
| H | 2.48076510  | 4.82481813  | -1.62321103 |
| C | -3.83210993 | 4.36633778  | 2.09438896  |
| C | -5.21269417 | 4.59517622  | 2.06885505  |
| H | -5.90946388 | 3.80615497  | 2.36091590  |
| C | -5.70016479 | 5.84235811  | 1.67349601  |
| H | -6.77780294 | 6.02238989  | 1.66260004  |
| C | -4.81892109 | 6.85903406  | 1.30658996  |
| H | -5.20646000 | 7.83375883  | 1.00133097  |
| C | -3.44136906 | 6.62944078  | 1.33062100  |
| H | -2.74759197 | 7.42198515  | 1.03939497  |
| C | -2.94909906 | 5.38761711  | 1.71931195  |
| H | -1.87067103 | 5.20809317  | 1.73937905  |
| C | -4.51355505 | 1.67556095  | 2.90136790  |
| C | -4.99150610 | 1.35003400  | 4.17400312  |
| H | -4.48379087 | 1.72116804  | 5.06640005  |
| C | -6.12446213 | 0.54587400  | 4.30436420  |
| H | -6.48790216 | 0.28411400  | 5.30046892  |
| C | -6.79930592 | 0.09228200  | 3.17207098  |
| H | -7.69729090 | -0.52018499 | 3.28264308  |
| C | -6.32382107 | 0.41618899  | 1.89912295  |
| H | -6.84598780 | 0.07312000  | 1.00198901  |
| C | -5.17046499 | 1.18257201  | 1.76454604  |
| H | -4.79009104 | 1.41383100  | 0.76639801  |
| C | -2.32370090 | 3.11176491  | 4.22827578  |
| C | -2.91847205 | 3.99705505  | 5.13827085  |
| H | -3.83407593 | 4.52982378  | 4.86745596  |
| C | -2.33962011 | 4.20300817  | 6.38857603  |
| H | -2.80754900 | 4.89135981  | 7.09617996  |
| C | -1.16557801 | 3.53201008  | 6.73515511  |
| H | -0.71451098 | 3.69520807  | 7.71693516  |
| C | -0.56005001 | 2.66529799  | 5.82549191  |

|   |             |             |             |
|---|-------------|-------------|-------------|
| H | 0.37109801  | 2.15673399  | 6.08532715  |
| C | -1.13279295 | 2.45966792  | 4.57115698  |
| H | -0.64676398 | 1.79901898  | 3.84621596  |
| C | 1.88483202  | -4.47628307 | -2.90876102 |
| C | 2.68760109  | -4.65653992 | -1.77205300 |
| H | 2.25146604  | -4.57784414 | -0.77228802 |
| C | 4.04070282  | -4.94758177 | -1.91003299 |
| H | 4.64661503  | -5.11442423 | -1.01580405 |
| C | 4.61170292  | -5.01729488 | -3.18322301 |
| H | 5.67722988  | -5.23141098 | -3.29448390 |
| C | 3.82315302  | -4.80867910 | -4.31316185 |
| H | 4.26919603  | -4.85415411 | -5.30906677 |
| C | 2.45780206  | -4.55129099 | -4.18131685 |
| H | 1.84438598  | -4.40592384 | -5.07257509 |
| C | -0.65242398 | -3.82315302 | -4.23603201 |
| C | -0.99782097 | -2.50985694 | -4.57725286 |
| H | -0.84987903 | -1.70326602 | -3.85222101 |
| C | -1.54304600 | -2.23455000 | -5.83068180 |
| H | -1.81384599 | -1.20862401 | -6.08984900 |
| C | -1.75698197 | -3.26925898 | -6.74098492 |
| H | -2.18649507 | -3.05296707 | -7.72217512 |
| C | -1.43609798 | -4.58343697 | -6.39614916 |
| H | -1.61469495 | -5.39587688 | -7.10433578 |
| C | -0.88744903 | -4.86300278 | -5.14668608 |
| H | -0.64518702 | -5.89457417 | -4.87706614 |
| C | -0.58157802 | -5.75853205 | -2.08066010 |
| C | 0.14730901  | -6.95355892 | -2.09928894 |
| H | 1.18483806  | -6.96228409 | -2.44190311 |
| C | -0.45776901 | -8.13934803 | -1.67942905 |
| H | 0.10984500  | -9.07266808 | -1.70013905 |
| C | -1.78268600 | -8.13740540 | -1.24369705 |
| H | -2.25028396 | -9.06891537 | -0.91645199 |
| C | -2.50985789 | -6.94537020 | -1.22673500 |
| H | -3.54648399 | -6.93805981 | -0.88076299 |
| C | -1.91216898 | -5.75910902 | -1.64084399 |
| H | -2.48076510 | -4.82481813 | -1.62321103 |
| C | 3.83210993  | -4.36633778 | 2.09438896  |
| C | 5.21269417  | -4.59517622 | 2.06885505  |
| H | 5.90946388  | -3.80615497 | 2.36091590  |
| C | 5.70016479  | -5.84235811 | 1.67349601  |
| H | 6.77780294  | -6.02238989 | 1.66260004  |
| C | 4.81892109  | -6.85903406 | 1.30658996  |
| H | 5.20646000  | -7.83375883 | 1.00133097  |
| C | 3.44136906  | -6.62944078 | 1.33062100  |
| H | 2.74759197  | -7.42198515 | 1.03939497  |
| C | 2.94909906  | -5.38761711 | 1.71931195  |
| H | 1.87067103  | -5.20809317 | 1.73937905  |
| C | 4.51355505  | -1.67556095 | 2.90136790  |
| C | 4.99150610  | -1.35003400 | 4.17400312  |
| H | 4.48379087  | -1.72116804 | 5.06640005  |
| C | 6.12446213  | -0.54587400 | 4.30436420  |
| H | 6.48790216  | -0.28411400 | 5.30046892  |
| C | 6.79930592  | -0.09228200 | 3.17207098  |
| H | 7.69729090  | 0.52018499  | 3.28264308  |

|   |             |             |            |
|---|-------------|-------------|------------|
| C | 6.32382107  | -0.41618899 | 1.89912295 |
| H | 6.84598780  | -0.07312000 | 1.00198901 |
| C | 5.17046499  | -1.18257201 | 1.76454604 |
| H | 4.79009104  | -1.41383100 | 0.76639801 |
| C | 2.32370090  | -3.11176491 | 4.22827578 |
| C | 2.91847205  | -3.99705505 | 5.13827085 |
| H | 3.83407593  | -4.52982378 | 4.86745596 |
| C | 2.33962011  | -4.20300817 | 6.38857603 |
| H | 2.80754900  | -4.89135981 | 7.09617996 |
| C | 1.16557801  | -3.53201008 | 6.73515511 |
| H | 0.71451098  | -3.69520807 | 7.71693516 |
| C | 0.56005001  | -2.66529799 | 5.82549191 |
| H | -0.37109801 | -2.15673399 | 6.08532715 |
| C | 1.13279295  | -2.45966792 | 4.57115698 |
| H | 0.64676398  | -1.79901898 | 3.84621596 |

$D_2 \text{Au}_9(\text{PR}_3)_8^{3+}$ , R=PhMe

|    |             |             |             |
|----|-------------|-------------|-------------|
| Au | 1.37762499  | -2.35743809 | 0.22466500  |
| Au | 2.32095909  | 0.14441200  | 1.38076794  |
| Au | -0.00006500 | -0.00001500 | 0.00013000  |
| Au | -1.37771404 | -2.35729909 | -0.22604699 |
| Au | -1.37785101 | 2.35724902  | 0.22608501  |
| Au | 1.37744606  | 2.35746503  | -0.22477400 |
| Au | -2.32098007 | 0.14507100  | -1.38062894 |
| Au | 2.32061696  | -0.14427701 | -1.38090897 |
| Au | -2.32085395 | -0.14514700 | 1.38091397  |
| P  | 2.76310992  | -4.21553802 | 0.47507101  |
| P  | 3.30617595  | 0.20005099  | 3.46143389  |
| P  | -2.76345611 | -4.21511412 | -0.47731099 |
| P  | -2.76377606 | 4.21498203  | 0.47691599  |
| P  | 2.76288700  | 4.21566010  | -0.47483200 |
| P  | -3.30579305 | 0.20220201  | -3.46142602 |
| P  | -3.30647707 | -0.20234600 | 3.46133590  |
| P  | 3.30665398  | -0.19998300 | -3.46121311 |
| C  | 3.07019210  | -4.64275312 | 2.21721506  |
| C  | 2.10892296  | -4.30534792 | 3.17823410  |
| H  | 1.21022201  | -3.75904894 | 2.87883806  |
| C  | 2.30431795  | -4.62759209 | 4.51708317  |
| H  | 1.55464005  | -4.32690096 | 5.25352287  |
| C  | 3.46032190  | -5.29960394 | 4.93767595  |
| C  | 3.65780711  | -5.65622377 | 6.38029385  |
| C  | 4.41802502  | -5.63064814 | 3.96840405  |
| H  | 5.33275223  | -6.14680099 | 4.27323484  |
| C  | 4.23597383  | -5.30088997 | 2.62814903  |
| H  | 5.01799488  | -5.53744888 | 1.90140903  |
| C  | 4.40421391  | -3.89547205 | -0.24080500 |
| C  | 5.14252090  | -2.81188798 | 0.25641701  |
| H  | 4.75341082  | -2.20349503 | 1.07877195  |
| C  | 6.38825417  | -2.51148605 | -0.28495699 |
| H  | 6.95409822  | -1.67255497 | 0.12806100  |



|   |             |             |             |
|---|-------------|-------------|-------------|
| C | 6.92274284  | -3.25987005 | -1.34365797 |
| C | 8.25174046  | -2.91683006 | -1.94870496 |
| C | 6.16546583  | -4.32712984 | -1.84220004 |
| H | 6.55669403  | -4.92491817 | -2.66976595 |
| C | 4.92443085  | -4.64768982 | -1.29920602 |
| H | 4.35874414  | -5.48924112 | -1.70437300 |
| C | 2.11339998  | -5.71383619 | -0.32386401 |
| C | 1.05054295  | -5.59463978 | -1.22631299 |
| H | 0.62910599  | -4.60626793 | -1.43475604 |
| C | 0.49924901  | -6.72244596 | -1.82598495 |
| H | -0.34345701 | -6.60607004 | -2.51318097 |
| C | 0.98732299  | -8.00239563 | -1.53655505 |
| C | 0.35026199  | -9.22356415 | -2.12550712 |
| C | 2.06049395  | -8.11227131 | -0.63908601 |
| H | 2.46464610  | -9.10096264 | -0.40449899 |
| C | 2.61573792  | -6.98932409 | -0.03527300 |
| H | 3.43629003  | -7.11306381 | 0.67574000  |
| C | 4.91215706  | -0.64126199 | 3.48642802  |
| C | 5.06135511  | -1.93718100 | 3.99150610  |
| H | 4.22023296  | -2.45007801 | 4.46522903  |
| C | 6.28773785  | -2.58804202 | 3.87657189  |
| H | 6.38915920  | -3.59892106 | 4.27748680  |
| C | 7.38397789  | -1.98047400 | 3.25416303  |
| C | 8.67946434  | -2.71256208 | 3.07872605  |
| C | 7.21879005  | -0.67837900 | 2.75822997  |
| H | 8.06298161  | -0.17442900 | 2.27930593  |
| C | 6.00182199  | -0.01609300 | 2.86278009  |
| H | 5.89470720  | 0.99209702  | 2.45370293  |
| C | 2.25352502  | -0.60591501 | 4.70750999  |
| C | 2.59776402  | -0.57998401 | 6.06762314  |
| H | 3.52499104  | -0.10185400 | 6.39374018  |
| C | 1.75630796  | -1.15188098 | 7.01333380  |
| H | 2.03745699  | -1.12029195 | 8.06980324  |
| C | 0.54573703  | -1.75815403 | 6.63765001  |
| C | -0.37536201 | -2.33739996 | 7.66844893  |
| C | 0.22048099  | -1.78925896 | 5.27938080  |
| H | -0.71843201 | -2.25025797 | 4.96545076  |
| C | 1.05888903  | -1.22116995 | 4.32342482  |
| H | 0.76774400  | -1.23895299 | 3.26820588  |
| C | 3.59493303  | 1.90230298  | 4.03774023  |
| C | 4.58535480  | 2.21314311  | 4.98016691  |
| H | 5.26206303  | 1.43548298  | 5.34478903  |
| C | 4.72671795  | 3.51765895  | 5.44130278  |
| H | 5.50894594  | 3.74523497  | 6.17083693  |
| C | 3.88817191  | 4.54691076  | 4.98591185  |
| C | 4.04955721  | 5.94801283  | 5.49441099  |
| C | 2.90934205  | 4.22679186  | 4.03814316  |
| H | 2.25980496  | 5.01437283  | 3.64705801  |
| C | 2.76989388  | 2.92700601  | 3.55944705  |
| H | 2.01924109  | 2.70685792  | 2.79293489  |
| C | -3.07042503 | -4.64173985 | -2.21961689 |
| C | -3.07125092 | 4.64160013  | 2.21913505  |
| C | 3.07048893  | 4.64287806  | -2.21687603 |
| C | -2.10897708 | -4.30420303 | -3.18040299 |

|   |             |             |             |
|---|-------------|-------------|-------------|
| C | -2.10997391 | 4.30424976  | 3.18016791  |
| C | 2.10944390  | 4.30556011  | -3.17815709 |
| H | -1.21024704 | -3.75812793 | -2.88069797 |
| H | -1.21106899 | 3.75833988  | 2.88068390  |
| H | 1.21061206  | 3.75934100  | -2.87900209 |
| C | -2.30419993 | -4.62606287 | -4.51937580 |
| C | -2.30557394 | 4.62610483  | 4.51907778  |
| C | 2.30523610  | 4.62777710  | -4.51695395 |
| H | -1.55435801 | -4.32529306 | -5.25562096 |
| H | -1.55585802 | 4.32548714  | 5.25551701  |
| H | 1.55573499  | 4.32715702  | -5.25360203 |
| C | -3.46020103 | -5.29786015 | -4.94030714 |
| C | -3.46180606 | 5.29770422  | 4.93971777  |
| C | 3.46142006  | 5.29968309  | -4.93722916 |
| C | -3.65752292 | -5.65421200 | -6.38301182 |
| C | -3.65950203 | 5.65397882  | 6.38239384  |
| C | 3.65932298  | 5.65627289  | -6.37979603 |
| C | -4.41809320 | -5.62903404 | -3.97125697 |
| C | -4.41951799 | 5.62868309  | 3.97043705  |
| C | 4.41888380  | 5.63064814  | -3.96769595 |
| H | -5.33283377 | -6.14500380 | -4.27635908 |
| H | -5.33441877 | 6.14450312  | 4.27530384  |
| H | 5.33374214  | 6.14671087  | -4.27228403 |
| C | -4.23622704 | -5.29962492 | -2.63089800 |
| C | -4.23726606 | 5.29928303  | 2.63012099  |
| C | 4.23644018  | 5.30090904  | -2.62748909 |
| H | -5.01839113 | -5.53627682 | -1.90434206 |
| H | -5.01929808 | 5.53578186  | 1.90337396  |
| H | 5.01828480  | 5.53739023  | -1.90053201 |
| C | -4.40456104 | -3.89503908 | 0.23856500  |
| C | -4.40466309 | 3.89475799  | -0.23938900 |
| C | 4.40378714  | 3.89566898  | 0.24157301  |
| C | -5.14296913 | -2.81153297 | -0.25868300 |
| C | -5.14323378 | 2.81137109  | 0.25785601  |
| C | 5.14225483  | 2.81203103  | -0.25528401 |
| H | -4.75402594 | -2.20325208 | -1.08120203 |
| H | -4.75452995 | 2.20320511  | 1.08057404  |
| H | 4.75337791  | 2.20350909  | -1.07765305 |
| C | -6.38860989 | -2.51106811 | 0.28287801  |
| C | -6.38875008 | 2.51085997  | -0.28399000 |
| C | 6.38785124  | 2.51173902  | 0.28646800  |
| H | -6.95454311 | -1.67220497 | -0.13016200 |
| H | -6.95481396 | 1.67207599  | 0.12901799  |
| H | 6.95382500  | 1.67276299  | -0.12627999 |
| C | -6.92291594 | -3.25931597 | 1.34176600  |
| C | -6.92274523 | 3.25893998  | -1.34313798 |
| C | 6.92203283  | 3.26028109  | 1.34520900  |
| C | -8.25184155 | -2.91626501 | 1.94695902  |
| C | -8.25165367 | 2.91606498  | -1.94847298 |
| C | 8.25088024  | 2.91737294  | 1.95065498  |
| C | -6.16553307 | -4.32648516 | 1.84034097  |
| C | -6.16515589 | 4.32595491  | -1.84175396 |
| C | 6.16458178  | 4.32757902  | 1.84340096  |
| H | -6.55658817 | -4.92415810 | 2.66807008  |

|   |             |             |             |
|---|-------------|-------------|-------------|
| H | -6.55596018 | 4.92347097  | -2.66971707 |
| H | 6.55560207  | 4.92550087  | 2.67097306  |
| C | -4.92458010 | -4.64708614 | 1.29719198  |
| C | -4.92434978 | 4.64661217  | -1.29832602 |
| C | 4.92368221  | 4.64803410  | 1.30003405  |
| H | -4.35880709 | -5.48854685 | 1.70241404  |
| H | -4.35842609 | 5.48797321  | -1.70354795 |
| H | 4.35786009  | 5.48961592  | 1.70494795  |
| C | -2.11403298 | -5.71377802 | 0.32119200  |
| C | -2.11433697 | 5.71367979  | -0.32150200 |
| C | 2.11292195  | 5.71395111  | 0.32391801  |
| C | -1.05088794 | -5.59513617 | 1.22337794  |
| C | -1.05094004 | 5.59513092  | -1.22339404 |
| C | 1.05001700  | 5.59470081  | 1.22631598  |
| H | -0.62900800 | -4.60696077 | 1.43186200  |
| H | -0.62880599 | 4.60701418  | -1.43164396 |
| H | 0.62863898  | 4.60630322  | 1.43476105  |
| C | -0.49993101 | -6.72323704 | 1.82279098  |
| C | -0.50003499 | 6.72327280  | -1.82279301 |
| C | 0.49863601  | 6.72247410  | 1.82594800  |
| H | 0.34297401  | -6.60728884 | 2.50981593  |
| H | 0.34307799  | 6.60740995  | -2.50957894 |
| H | -0.34409201 | 6.60606098  | 2.51311493  |
| C | -0.98863000 | -8.00295353 | 1.53334904  |
| C | -0.98906201 | 8.00292492  | -1.53364396 |
| C | 0.98666000  | 8.00245762  | 1.53653896  |
| C | -0.35189900 | -9.22441864 | 2.12204409  |
| C | -0.35248399 | 9.22446537  | -2.12234402 |
| C | 0.34946600  | 9.22354794  | 2.12550712  |
| C | -2.06204295 | -8.11227703 | 0.63610899  |
| C | -2.06272888 | 8.11215019  | -0.63668698 |
| C | 2.05983591  | 8.11238670  | 0.63909900  |
| H | -2.46666002 | -9.10077095 | 0.40149000  |
| H | -2.46761203 | 9.10059547  | -0.40231699 |
| H | 2.46394610  | 9.10109806  | 0.40451899  |
| C | -2.61696506 | -6.98901892 | 0.03256500  |
| C | -2.61757398 | 6.98886395  | -0.03313700 |
| C | 2.61517191  | 6.98946190  | 0.03531500  |
| H | -3.43775892 | -7.11233616 | -0.67824298 |
| H | -3.43857408 | 7.11210108  | 0.67744702  |
| H | 3.43574309  | 7.11324787  | -0.67566800 |
| C | -4.91154623 | -0.63948703 | -3.48755407 |
| C | -4.91226816 | 0.63927698  | 3.48680806  |
| C | 4.91264200  | 0.64135897  | -3.48551702 |
| C | -5.06032705 | -1.93482304 | -3.99422908 |
| C | -5.06138706 | 1.93452001  | 3.99359703  |
| C | 5.06204987  | 1.93726802  | -3.99053907 |
| H | -4.21899080 | -2.44691396 | -4.46844387 |
| H | -4.22029495 | 2.44662404  | 4.46822691  |
| H | 4.22114086  | 2.45014095  | -4.46466923 |
| C | -6.28657103 | -2.58613396 | -3.88029909 |
| C | -6.28764391 | 2.58574104  | 3.87921500  |
| C | 6.28837919  | 2.58815289  | -3.87506509 |
| H | -6.38768101 | -3.59654498 | -4.28246212 |

|   |             |             |             |
|---|-------------|-------------|-------------|
| H | -6.38902187 | 3.59609294  | 4.28146410  |
| H | 6.38997078  | 3.59901500  | -4.27597380 |
| C | -7.38306808 | -1.97958803 | -3.25735807 |
| C | -7.38381100 | 1.97916996  | 3.25572705  |
| C | 7.38432693  | 1.98063004  | -3.25212193 |
| C | -8.67844582 | -2.71213603 | -3.08305502 |
| C | -8.67919922 | 2.71159005  | 3.08095598  |
| C | 8.67975426  | 2.71267605  | -3.07608294 |
| C | -7.21828890 | -0.67805201 | -2.75980711 |
| C | -7.21869278 | 0.67771101  | 2.75806904  |
| C | 7.21892977  | 0.67853802  | -2.75622392 |
| H | -8.06269836 | -0.17488600 | -2.28044295 |
| H | -8.06284618 | 0.17454100  | 2.27825403  |
| H | 8.06290436  | 0.17462100  | -2.27687693 |
| C | -6.00146914 | -0.01534200 | -2.86331010 |
| C | -6.00185585 | 0.01510900  | 2.86199689  |
| C | 6.00203705  | 0.01622000  | -2.86134410 |
| H | -5.89468288 | 0.99236298  | -2.45294809 |
| H | -5.89479017 | -0.99253899 | 2.45155501  |
| H | 5.89476013  | -0.99196500 | -2.45229101 |
| C | -2.25248504 | -0.60259002 | -4.70773506 |
| C | -2.25361705 | 0.60248703  | 4.70799112  |
| C | 2.25446010  | 0.60608202  | -4.70762491 |
| C | -2.59524012 | -0.57401001 | -6.06816912 |
| C | -2.59663892 | 0.57376897  | 6.06834888  |
| C | 2.59912205  | 0.58028799  | -6.06762791 |
| H | -3.52165294 | -0.09441800 | -6.39445686 |
| H | -3.52303410 | 0.09399800  | 6.39442778  |
| H | 3.52644801  | 0.10220100  | -6.39352083 |
| C | -1.75325203 | -1.14498794 | -7.01395988 |
| C | -1.75493801 | 1.14485204  | 7.01433611  |
| C | 1.75799406  | 1.15236795  | -7.01353693 |
| H | -2.03322196 | -1.11129904 | -8.07067680 |
| H | -2.03511310 | 1.11105394  | 8.07099438  |
| H | 2.03950500  | 1.12094605  | -8.06991291 |
| C | -0.54361498 | -1.75297594 | -6.63803911 |
| C | -0.54532802 | 1.75306499  | 6.63869810  |
| C | 0.54733402  | 1.75865197  | -6.63816309 |
| C | 0.37815499  | -2.33112311 | -7.66885281 |
| C | 0.37620801  | 2.33116603  | 7.66974401  |
| C | -0.37359500 | 2.33776999  | -7.66918182 |
| C | -0.21989100 | -1.78677905 | -5.27946901 |
| C | -0.22131100 | 1.78698397  | 5.28019094  |
| C | 0.22164500  | 1.78960598  | -5.27999020 |
| H | 0.71830499  | -2.24911809 | -4.96535015 |
| H | 0.71688700  | 2.24947500  | 4.96627188  |
| H | -0.71731198 | 2.25066900  | -4.96627283 |
| C | -1.05882204 | -1.21958995 | -4.32343197 |
| C | -1.05996096 | 1.21970296  | 4.32396984  |
| C | 1.05973494  | 1.22136796  | -4.32385397 |
| H | -0.76877201 | -1.23935604 | -3.26794696 |
| H | -0.76969397 | 1.23953402  | 3.26854897  |
| H | 0.76828998  | 1.23907399  | -3.26871610 |
| C | -3.59455109 | 1.90473795  | -4.03687000 |

|   |             |              |             |
|---|-------------|--------------|-------------|
| C | -3.59550405 | -1.90491104  | 4.03656578  |
| C | 3.59568405  | -1.90221000  | -4.03745699 |
| C | -4.58537722 | 2.21621799   | -4.97857380 |
| C | -4.58656502 | -2.21637797  | 4.97802114  |
| C | 4.58627796  | -2.21296096  | -4.97968197 |
| H | -5.26260900 | 1.43892896   | -5.34300995 |
| H | -5.26378584 | -1.43905103  | 5.34240007  |
| H | 5.26310015  | -1.43528998  | -5.34406519 |
| C | -4.72665119 | 3.52101803   | -5.43913221 |
| C | -4.72811699 | -3.52122593  | 5.43837881  |
| C | 4.72784996  | -3.51749802  | -5.44081020 |
| H | -5.50941420 | 3.74912190   | -6.16791582 |
| H | -5.51108122 | -3.74931693  | 6.16695023  |
| H | 5.51036119  | -3.74501610  | -6.17005110 |
| C | -3.88745499 | 4.54977322   | -4.98401403 |
| C | -3.88897491 | -4.55003691  | 4.98330021  |
| C | 3.88925195  | -4.54678106  | -4.98569489 |
| C | -4.04646206 | 5.95072603   | -5.49368715 |
| C | -4.04806423 | -5.95099592  | 5.49292612  |
| C | 4.04932690  | -5.94758797  | -5.49541903 |
| C | -2.90833092 | 4.22903681   | -4.03664684 |
| C | -2.90964890 | -4.22932386  | 4.03612804  |
| C | 2.91036510  | -4.22678804  | -4.03787804 |
| H | -2.25858998 | 5.01634693   | -3.64534497 |
| H | -2.25997996 | -5.01667786  | 3.64478898  |
| H | 2.26099992  | -5.01447010  | -3.64669490 |
| C | -2.76902103 | 2.92909288   | -3.55850911 |
| C | -2.77005696 | -2.92934108  | 3.55820203  |
| C | 2.77073312  | -2.92705297  | -3.55920410 |
| H | -2.01824689 | 2.70849204   | -2.79224396 |
| H | -2.01915908 | -2.70876789  | 2.79205108  |
| H | 2.02010393  | -2.70701289  | -2.79263806 |
| H | 8.69080257  | 3.23534894   | -2.10408807 |
| H | 8.82903004  | 3.47138691   | -3.85691905 |
| H | 9.54024792  | 2.02864408   | -3.09078312 |
| H | 0.14477400  | 3.07466698   | -8.30226421 |
| H | -0.75028402 | 1.54821002   | -8.33875656 |
| H | -1.24224401 | 2.82690501   | -7.20667982 |
| H | 5.09829807  | -6.27614784  | -5.43756390 |
| H | 3.43418598  | -6.65928221  | -4.92759323 |
| H | 3.75335407  | -6.01623106  | -6.55471516 |
| H | 8.82784843  | -2.23579097  | -1.30625904 |
| H | 8.85960388  | -3.81726408  | -2.12116909 |
| H | 8.12117195  | -2.42665291  | -2.92808294 |
| H | 3.21814990  | -4.89772701  | 7.04421377  |
| H | 3.16883111  | -6.61690998  | 6.61242199  |
| H | 4.72189379  | -5.76374197  | 6.63288498  |
| H | -0.14416599 | -9.00443268  | -3.08216500 |
| H | 1.08085299  | -10.02909279 | -2.28597999 |
| H | -0.42241400 | -9.61284447  | -1.44092798 |
| H | 0.14138301  | -9.00590420  | 3.07943892  |
| H | -1.08242500 | -10.03029060 | 2.28105092  |
| H | 0.42170101  | -9.61289883  | 1.43805003  |
| H | -8.82791615 | -2.23501706  | 1.30470800  |

|   |             |             |             |
|---|-------------|-------------|-------------|
| H | -8.85978985 | -3.81667805 | 2.11925197  |
| H | -8.12115955 | -2.42633796 | 2.92644596  |
| H | -3.21662402 | -4.89630604 | -7.04677200 |
| H | -3.16970396 | -6.61554384 | -6.61491013 |
| H | -4.72164488 | -5.76038694 | -6.63604212 |
| H | 8.82920742  | -3.46999192 | 3.86072397  |
| H | 8.69016933  | -3.23682189 | 2.10758209  |
| H | 9.53984642  | -2.02836990 | 3.09195209  |
| H | 5.09547806  | 6.28245592  | 5.41655588  |
| H | 3.42008996  | 6.65688086  | 4.93893814  |
| H | 3.77399397  | 6.01401281  | 6.55928183  |
| H | 0.14191800  | -3.07754803 | 8.29866409  |
| H | -0.74879301 | -1.54872799 | 8.34085846  |
| H | -1.24599195 | -2.82292604 | 7.20587921  |
| H | -3.22011089 | 4.89523506  | 7.04620695  |
| H | -3.17037296 | 6.61450195  | 6.61487007  |
| H | -4.72361517 | 5.76164103  | 6.63481283  |
| H | 0.14211699  | 9.00570488  | -3.07899904 |
| H | -1.08339906 | 10.02971268 | -2.28273797 |
| H | 0.41997701  | 9.61395359  | -1.43764305 |
| H | -8.82680511 | 2.23284698  | -1.30749702 |
| H | -8.86050034 | 3.81635594  | -2.11829901 |
| H | -8.12107468 | 2.42860198  | -2.92919207 |
| H | 3.22022390  | 4.89754295  | -7.04382086 |
| H | 4.72346210  | 5.76420116  | -6.63198805 |
| H | 3.17003298  | 6.61673403  | -6.61218977 |
| H | 8.82720470  | 2.23630905  | 1.30843401  |
| H | 8.12005711  | 2.42726302  | 2.93003607  |
| H | 8.85864830  | 3.81785488  | 2.12321806  |
| H | -0.14327601 | 9.00474358  | 3.08311510  |
| H | -0.42466500 | 9.61155319  | 1.44184697  |
| H | 1.07958496  | 10.02984905 | 2.28419995  |
| H | -8.82718754 | -3.46971798 | -3.86509109 |
| H | -9.53905964 | -2.02824807 | -3.09717607 |
| H | -8.68989468 | -3.23623395 | -2.11183405 |
| H | -5.09664202 | 6.27677488  | -5.44529819 |
| H | -3.74070001 | 6.02108002  | -6.55012798 |
| H | -3.43806791 | 6.66328907  | -4.91969204 |
| H | -0.13893500 | -3.06996703 | -8.30075264 |
| H | 1.24804699  | -2.81789207 | -7.20619678 |
| H | 0.75270402  | -1.54157305 | -8.33960533 |
| H | -5.09869814 | -6.27595186 | 5.44749784  |
| H | -3.73926711 | -6.02198982 | 6.54845619  |
| H | -3.44199204 | -6.66399717 | 4.91701317  |
| H | -8.82812786 | 3.46941304  | 3.86272192  |
| H | -9.53977108 | 2.02764702  | 3.09514689  |
| H | -8.69051743 | 3.23536110  | 2.10955906  |
| H | -0.14148401 | 3.06857491  | 8.30280876  |
| H | 1.24527705  | 2.81955910  | 7.20726204  |
| H | 0.75209099  | 1.54124999  | 8.33933163  |

C<sub>4</sub> Au<sub>9</sub>(PR<sub>3</sub>)<sub>8</sub><sup>3+</sup>, R=PhMe

|    |             |             |             |
|----|-------------|-------------|-------------|
| Au | -0.09367100 | 0.00141000  | -0.02420200 |
| Au | -2.35511303 | 0.90378702  | -1.15310705 |
| Au | -2.39047194 | -0.92264599 | 1.00425994  |
| Au | 2.10716701  | -1.05868101 | -1.13049996 |
| Au | 2.26389599  | 0.68501002  | 1.10587502  |
| Au | -1.02676296 | -2.28603792 | -1.14723694 |
| Au | 0.72027898  | -2.35384393 | 1.03429496  |
| Au | 1.09089398  | 2.17903304  | -1.04720104 |
| Au | -0.98207402 | 2.36530209  | 0.88042903  |
| P  | -3.76543808 | 1.79732001  | -2.74503589 |
| P  | -3.94695902 | -1.61294997 | 2.56427503  |
| P  | 3.49824595  | -2.10613394 | -2.64047503 |
| P  | 3.85640407  | 1.40289199  | 2.63009000  |
| P  | -1.85617697 | -3.73631811 | -2.74858403 |
| P  | 1.50583506  | -3.67370009 | 2.75786304  |
| P  | 2.12659001  | 3.74659395  | -2.38587689 |
| P  | -1.74878097 | 4.04253721  | 2.27561092  |
| C  | -4.76825523 | 0.58145601  | -3.64819598 |
| C  | -4.98132801 | -0.68031800 | -3.08039403 |
| H  | -4.58510303 | -0.90386802 | -2.08589506 |
| C  | -5.66029215 | -1.66644299 | -3.78841710 |
| H  | -5.79962492 | -2.64994693 | -3.33382106 |
| C  | -6.13410902 | -1.42780101 | -5.08376503 |
| C  | -5.94353199 | -0.15110400 | -5.63194323 |
| H  | -6.32054806 | 0.06540500  | -6.63528204 |
| C  | -5.26969481 | 0.84246302  | -4.93020487 |
| H  | -5.11270189 | 1.81653595  | -5.39916420 |
| C  | -2.84416103 | 2.73760009  | -3.99777603 |
| C  | -1.52922404 | 2.36176491  | -4.30211020 |
| H  | -1.04338801 | 1.56747997  | -3.72629809 |
| C  | -0.82881701 | 3.00767303  | -5.31625414 |
| H  | 0.20152301  | 2.71146107  | -5.53100109 |
| C  | -1.41325605 | 4.04774189  | -6.04940891 |
| C  | -2.72259903 | 4.43006706  | -5.72224522 |
| H  | -3.19549704 | 5.24957800  | -6.27037716 |
| C  | -3.43179297 | 3.79168892  | -4.71012306 |
| H  | -4.44543123 | 4.12191820  | -4.46599913 |
| C  | -4.89074183 | 2.95798492  | -1.92045200 |
| C  | -6.24861193 | 2.67524195  | -1.74971902 |
| H  | -6.68987608 | 1.80139697  | -2.23687792 |
| C  | -7.04025984 | 3.50757098  | -0.95844901 |
| H  | -8.10018921 | 3.27262807  | -0.82872498 |
| C  | -6.50497389 | 4.63734818  | -0.33015299 |
| C  | -5.14731598 | 4.92620802  | -0.53783798 |
| H  | -4.70434093 | 5.80784988  | -0.06910500 |
| C  | -4.34435892 | 4.09489107  | -1.30568504 |
| H  | -3.27866912 | 4.31983900  | -1.41280305 |
| C  | -5.61519003 | -1.69158006 | 1.84045005  |
| C  | -6.57813501 | -2.60493708 | 2.28666711  |
| H  | -6.33197212 | -3.32108593 | 3.07551098  |
| C  | -7.84348011 | -2.62704206 | 1.70453501  |
| H  | -8.58242035 | -3.35071802 | 2.05916405  |

|   |             |             |             |
|---|-------------|-------------|-------------|
| C | -8.18226337 | -1.75135696 | 0.66296798  |
| C | -7.20678997 | -0.84567797 | 0.22068900  |
| H | -7.43625212 | -0.16551000 | -0.60385799 |
| C | -5.94178820 | -0.81255698 | 0.79776001  |
| H | -5.19109201 | -0.10985400 | 0.42114300  |
| C | -3.57218695 | -3.28076601 | 3.18329906  |
| C | -3.29427195 | -3.54565811 | 4.52649879  |
| H | -3.37854505 | -2.75431204 | 5.27315378  |
| C | -2.89027309 | -4.82033300 | 4.91973209  |
| H | -2.66456509 | -5.00537920 | 5.97269583  |
| C | -2.76162791 | -5.86185789 | 3.99585605  |
| C | -3.07707691 | -5.59080982 | 2.65510106  |
| H | -3.01075506 | -6.39261484 | 1.91470504  |
| C | -3.46051407 | -4.32076597 | 2.24732089  |
| H | -3.67500806 | -4.13847494 | 1.19167197  |
| C | -4.03903008 | -0.51456302 | 4.00728512  |
| C | -5.07462978 | -0.62472600 | 4.94631100  |
| H | -5.86648607 | -1.36619902 | 4.81055307  |
| C | -5.10505104 | 0.21502100  | 6.05337715  |
| H | -5.91870689 | 0.11834200  | 6.77777815  |
| C | -4.11431217 | 1.18964696  | 6.25491524  |
| C | -3.08926010 | 1.29386306  | 5.30890989  |
| H | -2.31478691 | 2.05520701  | 5.43295813  |
| C | -3.05250597 | 0.45869601  | 4.19542885  |
| H | -2.25616789 | 0.57613099  | 3.45321608  |
| C | 4.98774576  | -1.14555299 | -3.04689407 |
| C | 5.17779207  | 0.09313700  | -2.42202091 |
| H | 4.44703388  | 0.44608200  | -1.68853498 |
| C | 6.28182316  | 0.87925297  | -2.73291206 |
| H | 6.41195011  | 1.84270799  | -2.23358393 |
| C | 7.22600222  | 0.45888999  | -3.67647600 |
| C | 7.02894402  | -0.78290600 | -4.29862499 |
| H | 7.75293207  | -1.13389301 | -5.03886509 |
| C | 5.92576599  | -1.57449603 | -3.99672294 |
| H | 5.79837418  | -2.52861691 | -4.51315403 |
| C | 2.71101904  | -2.53727508 | -4.22297192 |
| C | 1.58856201  | -1.82338095 | -4.65888500 |
| H | 1.13817096  | -1.06894696 | -4.00692987 |
| C | 1.02959204  | -2.08411503 | -5.90687513 |
| H | 0.14285700  | -1.53007901 | -6.22301292 |
| C | 1.56494105  | -3.06777811 | -6.74932384 |
| C | 2.67004704  | -3.79917693 | -6.28938580 |
| H | 3.09032512  | -4.58898687 | -6.91821098 |
| C | 3.23452091  | -3.54526210 | -5.04314184 |
| H | 4.07536221  | -4.15344620 | -4.69824600 |
| C | 3.99273396  | -3.69114900 | -1.89462805 |
| C | 5.31908178  | -4.03891897 | -1.62090194 |
| H | 6.13558388  | -3.38080192 | -1.92897105 |
| C | 5.60291004  | -5.22660685 | -0.94819897 |
| H | 6.64448309  | -5.48934078 | -0.74401098 |
| C | 4.58201694  | -6.08475685 | -0.52111799 |
| C | 3.25558305  | -5.72692394 | -0.80598599 |
| H | 2.43610907  | -6.37253618 | -0.47904900 |
| C | 2.95995092  | -4.55032492 | -1.48381400 |



|   |             |             |             |
|---|-------------|-------------|-------------|
| H | 1.91448700  | -4.29261112 | -1.68071604 |
| C | 5.52872181  | 1.22803903  | 1.92842996  |
| C | 6.57887506  | 2.10662293  | 2.22005796  |
| H | 6.41289806  | 2.96653390  | 2.87365294  |
| C | 7.83787203  | 1.90618205  | 1.65667498  |
| H | 8.64528370  | 2.60610294  | 1.88856494  |
| C | 8.08621597  | 0.83130300  | 0.79236001  |
| C | 7.02726698  | -0.04328000 | 0.51223302  |
| H | 7.18735600  | -0.87887502 | -0.17442900 |
| C | 5.76755810  | 0.14928900  | 1.06657803  |
| H | 4.95539904  | -0.54072702 | 0.82082498  |
| C | 3.62688303  | 3.15198588  | 3.08624101  |
| C | 4.23699999  | 3.70069909  | 4.22276688  |
| H | 4.85142899  | 3.07713389  | 4.87717581  |
| C | 4.04066992  | 5.03887796  | 4.54846001  |
| H | 4.52241087  | 5.44890118  | 5.44017601  |
| C | 3.21625590  | 5.86150694  | 3.76877594  |
| C | 2.59732294  | 5.29837513  | 2.64696789  |
| H | 1.93659496  | 5.91551208  | 2.03446889  |
| C | 2.79883409  | 3.96635509  | 2.30429411  |
| H | 2.29692602  | 3.55251598  | 1.42504501  |
| C | 3.88541889  | 0.52054602  | 4.22067404  |
| C | 5.05480814  | 0.39667201  | 4.98180485  |
| H | 6.01203585  | 0.73989999  | 4.58044291  |
| C | 5.00589085  | -0.16906400 | 6.25202990  |
| H | 5.92668486  | -0.25198400 | 6.83636093  |
| C | 3.80176306  | -0.64341199 | 6.79095316  |
| C | 2.64465809  | -0.53681999 | 6.01025200  |
| H | 1.69760895  | -0.92470098 | 6.39272213  |
| C | 2.68233895  | 0.03364700  | 4.74131393  |
| H | 1.76764405  | 0.09196200  | 4.14417791  |
| C | -0.78463101 | -5.18340921 | -2.98305893 |
| C | -0.83301401 | -6.22814417 | -2.05017304 |
| H | -1.59093201 | -6.22341013 | -1.26157403 |
| C | 0.07925000  | -7.27596998 | -2.12384295 |
| H | 0.02789600  | -8.08514690 | -1.39129901 |
| C | 1.06725097  | -7.31276417 | -3.11595702 |
| C | 1.10013700  | -6.26517105 | -4.04493189 |
| H | 1.85689795  | -6.26726294 | -4.83304977 |
| C | 0.19614100  | -5.20966721 | -3.98279405 |
| H | 0.26526999  | -4.39952707 | -4.71187496 |
| C | -2.10455704 | -2.95436192 | -4.37226820 |
| C | -2.11273909 | -1.55910206 | -4.46196222 |
| H | -1.89056897 | -0.95691901 | -3.57514000 |
| C | -2.41701198 | -0.93064398 | -5.66671181 |
| H | -2.42367792 | 0.16083001  | -5.71488094 |
| C | -2.72437596 | -1.67394996 | -6.81099796 |
| C | -2.69606090 | -3.07477307 | -6.71624804 |
| H | -2.92136908 | -3.67829704 | -7.60013008 |
| C | -2.39344406 | -3.71007609 | -5.51736116 |
| H | -2.37860489 | -4.80214214 | -5.47745514 |
| C | -3.49521494 | -4.37693501 | -2.27463198 |
| C | -4.06583118 | -5.49003887 | -2.90917206 |
| H | -3.49369907 | -6.05784178 | -3.64758301 |

|   |             |             |             |
|---|-------------|-------------|-------------|
| C | -5.36230278 | -5.88417912 | -2.59830308 |
| H | -5.79339218 | -6.75261307 | -3.10402894 |
| C | -6.12838984 | -5.18865490 | -1.64848602 |
| C | -5.54602194 | -4.08616018 | -1.01354897 |
| H | -6.11804008 | -3.52525091 | -0.27177900 |
| C | -4.24752188 | -3.68589497 | -1.31957901 |
| H | -3.81659603 | -2.81571293 | -0.81427503 |
| C | 1.33685601  | -5.45663309 | 2.44776607  |
| C | 2.28758693  | -6.38425779 | 2.89005589  |
| H | 3.17929101  | -6.04326391 | 3.42326188  |
| C | 2.11155510  | -7.74124002 | 2.63267207  |
| H | 2.86395311  | -8.45461273 | 2.97974110  |
| C | 0.99102497  | -8.20950603 | 1.93233895  |
| C | 0.05166100  | -7.26729202 | 1.49054003  |
| H | -0.82931101 | -7.60844183 | 0.93984300  |
| C | 0.22005200  | -5.90862989 | 1.73514402  |
| H | -0.51725602 | -5.18915319 | 1.36814797  |
| C | 3.28121996  | -3.38584805 | 3.02723408  |
| C | 3.85552406  | -3.23988390 | 4.29274607  |
| H | 3.23683596  | -3.29031610 | 5.19061613  |
| C | 5.22382689  | -3.00590301 | 4.41583300  |
| H | 5.65605211  | -2.88643408 | 5.41184282  |
| C | 6.05031681  | -2.90741205 | 3.29200006  |
| C | 5.46513224  | -3.08322096 | 2.02981806  |
| H | 6.08781815  | -3.03148508 | 1.13349903  |
| C | 4.10211277  | -3.30837011 | 1.89150095  |
| H | 3.67375588  | -3.42361808 | 0.89188200  |
| C | 0.65333998  | -3.32184601 | 4.32722092  |
| C | 0.73964101  | -4.18905687 | 5.42534685  |
| H | 1.28192794  | -5.13461018 | 5.33738899  |
| C | 0.12791300  | -3.85797095 | 6.63020420  |
| H | 0.20466200  | -4.54622984 | 7.47661400  |
| C | -0.59429902 | -2.66353393 | 6.77474403  |
| C | -0.69544899 | -1.81749701 | 5.66442108  |
| H | -1.27757204 | -0.89576101 | 5.74160385  |
| C | -0.08660400 | -2.14113402 | 4.45480204  |
| H | -0.19880299 | -1.47445798 | 3.59377408  |
| C | 1.00676000  | 4.97805405  | -3.11095905 |
| C | -0.30375499 | 5.07597303  | -2.63177800 |
| H | -0.65440702 | 4.38040113  | -1.86362898 |
| C | -1.16140103 | 6.05273819  | -3.12787294 |
| H | -2.17993999 | 6.12147617  | -2.73792505 |
| C | -0.74204701 | 6.94780493  | -4.11803484 |
| C | 0.57103801  | 6.83355522  | -4.60048294 |
| H | 0.92044199  | 7.52056599  | -5.37606382 |
| C | 1.43676996  | 5.86294413  | -4.10953617 |
| H | 2.45295691  | 5.79613304  | -4.50680017 |
| C | 3.09866405  | 2.99825191  | -3.72782803 |
| C | 2.68624806  | 1.77233398  | -4.26508188 |
| H | 1.80557799  | 1.27045095  | -3.85285902 |
| C | 3.40877008  | 1.17349505  | -5.29206800 |
| H | 3.08102894  | 0.20837501  | -5.68629122 |
| C | 4.56525087  | 1.77257502  | -5.80655479 |
| C | 4.97372389  | 2.99644399  | -5.25759220 |

|   |             |             |             |
|---|-------------|-------------|-------------|
| H | 5.87830114  | 3.48020697  | -5.63658381 |
| C | 4.25748491  | 3.60435200  | -4.23140907 |
| H | 4.61649084  | 4.54489708  | -3.80467391 |
| C | 3.32630110  | 4.66998291  | -1.37688899 |
| C | 3.18597507  | 6.02981806  | -1.08898497 |
| H | 2.37158608  | 6.60308695  | -1.53846097 |
| C | 4.08967209  | 6.66140079  | -0.23403101 |
| H | 3.96303296  | 7.72489405  | -0.01409600 |
| C | 5.15396500  | 5.96206093  | 0.34285900  |
| C | 5.29653788  | 4.60213709  | 0.02724800  |
| H | 6.12073183  | 4.03061724  | 0.45937201  |
| C | 4.39101219  | 3.95794010  | -0.80279499 |
| H | 4.50461912  | 2.88769698  | -0.99994999 |
| C | -1.73676205 | 5.67721796  | 1.47748601  |
| C | -2.76474094 | 6.61132622  | 1.63864505  |
| H | -3.63406491 | 6.37018585  | 2.25574899  |
| C | -2.69315910 | 7.84861612  | 0.99859500  |
| H | -3.50874400 | 8.56543541  | 1.12708104  |
| C | -1.60029101 | 8.18895245  | 0.19265901  |
| C | -0.57138199 | 7.24606991  | 0.04815600  |
| H | 0.28453901  | 7.48055220  | -0.58951998 |
| C | -0.63740802 | 6.00712681  | 0.67149401  |
| H | 0.16124199  | 5.27545786  | 0.51261902  |
| C | -3.44613504 | 3.73138189  | 2.84925008  |
| C | -3.94979191 | 4.30800295  | 4.02245903  |
| H | -3.32416701 | 4.97133780  | 4.62533188  |
| C | -5.24304390 | 4.01805019  | 4.44489717  |
| H | -5.62146282 | 4.47548819  | 5.36306286  |
| C | -6.06293201 | 3.13740110  | 3.72474289  |
| C | -5.55247498 | 2.57529593  | 2.54799891  |
| H | -6.17216110 | 1.88840795  | 1.96594501  |
| C | -4.26415300 | 2.86499405  | 2.11278796  |
| H | -3.88619590 | 2.40167093  | 1.19677305  |
| C | -0.71310699 | 4.22286892  | 3.75994205  |
| C | -0.61316800 | 5.43773603  | 4.44977522  |
| H | -1.14806199 | 6.32080793  | 4.08921480  |
| C | 0.19108900  | 5.53499413  | 5.58088779  |
| H | 0.26514700  | 6.49212694  | 6.10428381  |
| C | 0.92400199  | 4.43561888  | 6.04919100  |
| C | 0.82473099  | 3.22835302  | 5.34593201  |
| H | 1.40962195  | 2.36476398  | 5.67343807  |
| C | 0.02122400  | 3.12070990  | 4.21604013  |
| H | -0.01215600 | 2.17752194  | 3.66106510  |
| C | -6.77865124 | -2.52134895 | -5.87946892 |
| H | -6.02008915 | -3.03501010 | -6.49451113 |
| H | -7.23766279 | -3.27968001 | -5.22971678 |
| H | -7.54769993 | -2.13311601 | -6.56237602 |
| C | -0.66714603 | 4.72511816  | -7.15845013 |
| H | 0.41970199  | 4.62845087  | -7.03019524 |
| H | -0.93068099 | 4.27909088  | -8.13189602 |
| H | -0.91342002 | 5.79507399  | -7.21594286 |
| C | -7.33220005 | 5.49140882  | 0.58137399  |
| H | -7.12277699 | 5.22871590  | 1.63269401  |
| H | -7.09786701 | 6.55901718  | 0.45921499  |

|   |              |              |             |
|---|--------------|--------------|-------------|
| H | -8.40864944  | 5.35311508   | 0.41050601  |
| C | -9.54794121  | -1.77483702  | 0.04574000  |
| H | -9.51858425  | -1.47871304  | -1.01257002 |
| H | -10.00955582 | -2.76993489  | 0.11573800  |
| H | -10.21852207 | -1.06995797  | 0.56488299  |
| C | -2.26305699  | -7.21309423  | 4.40842199  |
| H | -1.18995595  | -7.30863714  | 4.16916990  |
| H | -2.38301706  | -7.38119411  | 5.48749113  |
| H | -2.78648496  | -8.01877785  | 3.87301898  |
| C | -4.17344379  | 2.10205293   | 7.44222689  |
| H | -5.11722803  | 2.66978097   | 7.45287895  |
| H | -4.13485384  | 1.53271604   | 8.38429546  |
| H | -3.34354305  | 2.82182288   | 7.44321585  |
| C | 8.38891792   | 1.33163202   | -4.03950787 |
| H | 8.73455811   | 1.92391002   | -3.17993402 |
| H | 9.23651600   | 0.74758798   | -4.42431307 |
| H | 8.09916973   | 2.04721189   | -4.82770395 |
| C | 4.89706516   | -7.32780790  | 0.25419500  |
| H | 5.01628208   | -7.08762598  | 1.32380700  |
| H | 4.09006786   | -8.06956863  | 0.17517599  |
| H | 5.83495617   | -7.79119587  | -0.08401800 |
| C | 0.97103399   | -3.32586193  | -8.10095024 |
| H | -0.11140300  | -3.13387394  | -8.10195732 |
| H | 1.42511702   | -2.66223788  | -8.85545731 |
| H | 1.14303303   | -4.35982513  | -8.43124104 |
| C | 9.43950462   | 0.60929102   | 0.18713500  |
| H | 9.35803223   | 0.27213800   | -0.85717702 |
| H | 10.05423641  | 1.51954103   | 0.21247500  |
| H | 9.98792267   | -0.17296700  | 0.73763299  |
| C | 3.01081896   | 7.30543423   | 4.11194801  |
| H | 3.13384390   | 7.49104881   | 5.18846083  |
| H | 3.74798703   | 7.93652296   | 3.58716798  |
| H | 2.01138806   | 7.65028000   | 3.81043005  |
| C | 3.76711297   | -1.29213297  | 8.14231205  |
| H | 4.20088816   | -2.30535793  | 8.09951496  |
| H | 4.35486078   | -0.72433901  | 8.87869644  |
| H | 2.73969698   | -1.38883400  | 8.51990891  |
| C | 2.08683801   | -8.40979576  | -3.15978599 |
| H | 1.77888703   | -9.27928543  | -2.56258798 |
| H | 2.27296901   | -8.74857140  | -4.18943882 |
| H | 3.04890299   | -8.04936028  | -2.75720501 |
| C | -7.52084923  | -5.62961388  | -1.31181800 |
| H | -7.50186920  | -6.55027103  | -0.70593601 |
| H | -8.05801296  | -4.86272478  | -0.73672098 |
| H | -8.10148239  | -5.85571003  | -2.21857095 |
| C | -3.10018897  | -0.99996299  | -8.09552383 |
| H | -2.82952094  | 0.06486600   | -8.08986855 |
| H | -2.61894703  | -1.47770500  | -8.96195316 |
| H | -4.18908215  | -1.06433904  | -8.25695705 |
| C | 0.79277700   | -9.67466164  | 1.68370295  |
| H | 0.18171000   | -9.85814667  | 0.78810602  |
| H | 1.75084603   | -10.20029736 | 1.56361699  |
| H | 0.27141899   | -10.14412880 | 2.53451490  |
| C | -1.24330294  | -2.30864310  | 8.07928753  |

|   |             |             |             |
|---|-------------|-------------|-------------|
| H | -1.96885002 | -1.49151003 | 7.96083879  |
| H | -1.76374996 | -3.17281103 | 8.51872921  |
| H | -0.49057001 | -1.98295200 | 8.81625175  |
| C | 7.50690079  | -2.57860208 | 3.41573906  |
| H | 7.68667889  | -1.53567100 | 3.10275698  |
| H | 7.86688185  | -2.68888998 | 4.44775677  |
| H | 8.12187195  | -3.21951389 | 2.76627707  |
| C | 6.08878422  | 6.61797619  | 1.31272197  |
| H | 5.82098722  | 6.32956123  | 2.34356308  |
| H | 7.12998819  | 6.30486917  | 1.14624906  |
| H | 6.04503298  | 7.71398783  | 1.24896502  |
| C | 5.33804417  | 1.12797594  | -6.91698885 |
| H | 5.16510916  | 0.04334600  | -6.94946384 |
| H | 5.03674793  | 1.54429400  | -7.89259100 |
| H | 6.41858721  | 1.30185795  | -6.81109095 |
| C | -1.67775404 | 7.97590208  | -4.67800283 |
| H | -2.10987091 | 7.62644720  | -5.63100195 |
| H | -2.51484299 | 8.17945862  | -3.99560595 |
| H | -1.16146600 | 8.92355824  | -4.88950586 |
| C | -1.51832795 | 9.51420021  | -0.50297397 |
| H | -1.22810805 | 9.38916969  | -1.55766404 |
| H | -2.47360110 | 10.05523777 | -0.46888301 |
| H | -0.75536901 | 10.15610886 | -0.03336900 |
| C | 1.78662598  | 4.54631615  | 7.26944399  |
| H | 2.59253001  | 3.79904199  | 7.26107407  |
| H | 2.23848009  | 5.54506397  | 7.35575724  |
| H | 1.19120598  | 4.38192511  | 8.18298912  |
| C | -7.42650318 | 2.76776195  | 4.22332191  |
| H | -7.36189890 | 1.86920500  | 4.86020184  |
| H | -7.87379980 | 3.56938195  | 4.82779217  |
| H | -8.11080742 | 2.53102112  | 3.39612508  |

$D_2 \text{Au}_9(\text{PR}_3)_8^{3+}$ , R=PhOMe

|    |             |             |             |
|----|-------------|-------------|-------------|
| Au | -1.32518804 | 2.38073111  | 0.23258400  |
| Au | -2.32148695 | -0.10363600 | 1.38548303  |
| Au | 0.00021200  | 0.00020800  | -0.00949900 |
| Au | 1.42990506  | 2.32244492  | -0.23789699 |
| Au | 1.32600796  | -2.38036203 | 0.23350300  |
| Au | -1.42922294 | -2.32212210 | -0.23746800 |
| Au | 2.33440804  | -0.20261000 | -1.37682498 |
| Au | -2.33357811 | 0.20255400  | -1.37768900 |
| Au | 2.32122588  | 0.10425700  | 1.38619804  |
| P  | -2.66908407 | 4.27342510  | 0.48189300  |
| P  | -3.31249595 | -0.12070500 | 3.46678710  |
| P  | 2.85210896  | 4.15775490  | -0.48060200 |
| P  | 2.66994095  | -4.27301407 | 0.48298401  |
| P  | -2.85143995 | -4.15763617 | -0.47853300 |
| P  | 3.31889796  | -0.26140201 | -3.46151900 |
| P  | 3.31188297  | 0.12210400  | 3.46766305  |
| P  | -3.31923199 | 0.25944200  | -3.46202397 |
| C  | -2.93630409 | 4.72089481  | 2.22170305  |
| C  | -2.00133801 | 4.31577492  | 3.17836809  |

|   |             |             |             |
|---|-------------|-------------|-------------|
| H | -1.13786197 | 3.71957803  | 2.87076497  |
| C | -2.15926504 | 4.62413979  | 4.52680683  |
| H | -1.42441595 | 4.25824118  | 5.24322224  |
| C | -3.28039503 | 5.35621023  | 4.94296598  |
| C | -2.66490889 | 5.24631119  | 7.22770882  |
| C | -4.22329998 | 5.77594614  | 3.98554897  |
| H | -5.08938980 | 6.34384489  | 4.33198881  |
| C | -4.05832005 | 5.45249605  | 2.64875698  |
| H | -4.82357597 | 5.74980116  | 1.92613304  |
| C | -4.31713915 | 3.95355797  | -0.20523199 |
| C | -5.03960419 | 2.85499907  | 0.29879299  |
| H | -4.64936209 | 2.27330589  | 1.13932204  |
| C | -6.25010395 | 2.49360800  | -0.26287001 |
| H | -6.81934309 | 1.64750898  | 0.12542400  |
| C | -6.76140499 | 3.20429492  | -1.36338103 |
| C | -8.46569824 | 3.36734509  | -3.00681305 |
| C | -6.05439520 | 4.30299091  | -1.86526000 |
| H | -6.42777109 | 4.87289715  | -2.71593094 |
| C | -4.84076977 | 4.66988087  | -1.28195703 |
| H | -4.29162121 | 5.52036715  | -1.69272697 |
| C | -1.98088300 | 5.72643423  | -0.35462999 |
| C | -0.92152798 | 5.54262304  | -1.24797595 |
| H | -0.56097698 | 4.52938080  | -1.45220602 |
| C | -0.27577701 | 6.61969709  | -1.84569895 |
| H | 0.56439298  | 6.43172312  | -2.51426911 |
| C | -0.67499399 | 7.92469311  | -1.52832794 |
| C | 0.98974502  | 8.90171432  | -2.89804006 |
| C | -1.75417304 | 8.12256908  | -0.64641201 |
| H | -2.04995894 | 9.14851856  | -0.41957799 |
| C | -2.39531207 | 7.03958797  | -0.07005700 |
| H | -3.21475506 | 7.21926117  | 0.63065302  |
| C | -4.89610910 | 0.75029999  | 3.51325893  |
| C | -5.00416899 | 2.06556702  | 3.97289300  |
| H | -4.13870907 | 2.57209992  | 4.40844822  |
| C | -6.20829105 | 2.75899601  | 3.86508608  |
| H | -6.25723886 | 3.78392792  | 4.23043919  |
| C | -7.32409716 | 2.14251995  | 3.28139591  |
| C | -8.68515682 | 4.06850815  | 3.50760889  |
| C | -7.22042418 | 0.81461102  | 2.82661605  |
| H | -8.09475136 | 0.33685800  | 2.38023496  |
| C | -6.02143288 | 0.13584700  | 2.93476200  |
| H | -5.95384407 | -0.88657302 | 2.55890989  |
| C | -2.23516512 | 0.66622102  | 4.69853592  |
| C | -2.57266212 | 0.66340297  | 6.06444883  |
| H | -3.51798105 | 0.22632700  | 6.39680195  |
| C | -1.71583295 | 1.20497799  | 7.00615788  |
| H | -1.95868802 | 1.19539595  | 8.07044220  |
| C | -0.49110499 | 1.77305603  | 6.60596323  |
| C | 1.50935805  | 2.86430812  | 7.24488783  |
| C | -0.15365800 | 1.79463804  | 5.24796009  |
| H | 0.79269803  | 2.21786404  | 4.91398191  |
| C | -1.02075100 | 1.23685706  | 4.31205988  |
| H | -0.73000997 | 1.23459399  | 3.25643396  |
| C | -3.64024305 | -1.81188703 | 4.05205679  |

|   |             |             |             |
|---|-------------|-------------|-------------|
| C | -4.61960983 | -2.09124589 | 5.01128721  |
| H | -5.26231813 | -1.28994906 | 5.38653898  |
| C | -4.81051779 | -3.38629198 | 5.49051189  |
| H | -5.58603621 | -3.56957293 | 6.23479223  |
| C | -4.00888205 | -4.43317986 | 5.00897694  |
| C | -5.07335901 | -6.06992912 | 6.35968304  |
| C | -3.02999902 | -4.16128683 | 4.03806114  |
| H | -2.43581605 | -4.99285984 | 3.65326810  |
| C | -2.86043692 | -2.87314200 | 3.56083012  |
| H | -2.11946106 | -2.68182397 | 2.77734303  |
| C | 3.13812399  | 4.59783697  | -2.21944404 |
| C | 2.93732190  | -4.72010517 | 2.22289109  |
| C | -3.13771892 | -4.59815693 | -2.21726894 |
| C | 2.18834400  | 4.23224020  | -3.17734504 |
| C | 2.00252891  | -4.31465578 | 3.17958808  |
| C | -2.18863797 | -4.23179007 | -3.17557812 |
| H | 1.30123401  | 3.67126489  | -2.87100005 |
| H | 1.13917398  | -3.71827793 | 2.87200594  |
| H | -1.30190206 | -3.66997790 | -2.86965895 |
| C | 2.35989094  | 4.53495884  | -4.52541018 |
| C | 2.16041207  | -4.62299824 | 4.52804422  |
| C | -2.36037707 | -4.53486395 | -4.52353907 |
| H | 1.61145794  | 4.19971323  | -5.24280787 |
| H | 1.42571199  | -4.25678682 | 5.24445820  |
| H | -1.61248696 | -4.19904280 | -5.24122715 |
| C | 3.51026392  | 5.22120285  | -4.93974781 |
| C | 3.28130293  | -5.35544300 | 4.94417191  |
| C | -3.51024890 | -5.22223186 | -4.93740082 |
| C | 2.89530897  | 5.13450480  | -7.22555494 |
| C | 2.66534805  | -5.24627018 | 7.22883701  |
| C | -2.89633799 | -5.13478708 | -7.22340488 |
| C | 4.46798182  | 5.60231876  | -3.98094702 |
| C | 4.22405815  | -5.77547312 | 3.98673892  |
| C | -4.46733999 | -5.60399008 | -3.97821689 |
| H | 5.35655880  | 6.13529921  | -4.32592821 |
| H | 5.08996582  | -6.34366608 | 4.33315516  |
| H | -5.35558796 | -6.13775587 | -4.32282400 |
| C | 4.28898191  | 5.28432417  | -2.64470100 |
| C | 4.05915785  | -5.45198917 | 2.64995599  |
| C | -4.28813982 | -5.28566217 | -2.64207101 |
| H | 5.06519318  | 5.54964781  | -1.92137694 |
| H | 4.82428503  | -5.74961901 | 1.92733395  |
| H | -5.06390190 | -5.55154991 | -1.91847098 |
| C | 4.48621416  | 3.76664901  | 0.20334201  |
| C | 4.31787682  | -3.95290899 | -0.20432600 |
| C | -4.48557615 | -3.76711607 | 0.20565000  |
| C | 5.17164993  | 2.65415692  | -0.32151300 |
| C | 5.04086590  | -2.85511804 | 0.30063701  |
| C | -5.17086077 | -2.65408802 | -0.31826201 |
| H | 4.76395321  | 2.10372400  | -1.17466795 |
| H | 4.65131998  | -2.27445197 | 1.14220500  |
| H | -4.76269197 | -2.10253906 | -1.17046702 |
| C | 6.36754704  | 2.23982191  | 0.23491500  |
| C | 6.25092793  | -2.49306607 | -0.26156101 |

|   |             |             |             |
|---|-------------|-------------|-------------|
| C | -6.36719322 | -2.24065900 | 0.23788001  |
| H | 6.90837097  | 1.38270199  | -0.16949201 |
| H | 6.82056093  | -1.64753306 | 0.12738600  |
| H | -6.90791607 | -1.38314104 | -0.16581500 |
| C | 6.90040112  | 2.91015911  | 1.35039306  |
| C | 6.76128006  | -3.20230293 | -1.36344194 |
| C | -6.90067577 | -2.91245604 | 1.35217595  |
| C | 8.60680962  | 2.98410702  | 2.99786997  |
| C | 8.46454811  | -3.36302590 | -3.00844407 |
| C | -8.60847664 | -2.98824501 | 2.99849296  |
| C | 6.22989178  | 4.02170992  | 1.87370706  |
| C | 6.05376387  | -4.30024481 | -1.86624599 |
| C | -6.23025322 | -4.02443886 | 1.87465894  |
| H | 6.62061691  | 4.56105280  | 2.73642802  |
| H | 6.42637014  | -4.86900282 | -2.71802306 |
| H | -6.62134314 | -4.56485796 | 2.73653889  |
| C | 5.03104782  | 4.44205618  | 1.29584801  |
| C | 4.84056377  | -4.66779518 | -1.28246701 |
| C | -5.03095913 | -4.44386482 | 1.29705298  |
| H | 4.51074982  | 5.30276108  | 1.72247696  |
| H | 4.29097700  | -5.51764822 | -1.69396305 |
| H | -4.51075315 | -5.30491877 | 1.72307706  |
| C | 2.22837591  | 5.63592577  | 0.36189601  |
| C | 1.98190606  | -5.72626400 | -0.35322401 |
| C | -2.22709990 | -5.63548994 | 0.36408201  |
| C | 1.15498996  | 5.49748707  | 1.24648905  |
| C | 0.92212701  | -5.54286718 | -1.24613202 |
| C | -1.15289104 | -5.49676514 | 1.24759805  |
| H | 0.74153399  | 4.50204277  | 1.43744004  |
| H | 0.56131399  | -4.52974319 | -1.45046604 |
| H | -0.73918098 | -4.50127077 | 1.43776000  |
| C | 0.56233400  | 6.59993887  | 1.85291505  |
| C | 0.27632099  | -6.62018585 | -1.84335494 |
| C | -0.55979002 | -6.59900379 | 1.85401297  |
| H | -0.28999001 | 6.44810677  | 2.51524806  |
| H | -0.56426698 | -6.43247223 | -2.51147294 |
| H | 0.29317501  | -6.44693518 | 2.51545596  |
| C | 1.03040004  | 7.88584805  | 1.55244601  |
| C | 0.67583603  | -7.92503309 | -1.52578902 |
| C | -1.02833903 | -7.88498211 | 1.55464101  |
| C | -0.58381099 | 8.93219471  | 2.93136501  |
| C | -0.98894203 | -8.90297604 | -2.89507198 |
| C | 0.58666301  | -8.93098259 | 2.93305993  |
| C | 2.12261510  | 8.03742218  | 0.67738599  |
| C | 1.75543702  | -8.12251186 | -0.64428997 |
| C | -2.12131310 | -8.03686810 | 0.68057901  |
| H | 2.47207093  | 9.04911995  | 0.46328500  |
| H | 2.05150795  | -9.14835835 | -0.41733900 |
| H | -2.47103691 | -9.04862976 | 0.46721900  |
| C | 2.71103001  | 6.92903614  | 0.09323800  |
| C | 2.39669991  | -7.03928709 | -0.06853200 |
| C | -2.71009898 | -6.92869806 | 0.09640800  |
| H | 3.54351807  | 7.07367706  | -0.60014999 |
| H | 3.21651602  | -7.21867418 | 0.63181299  |



|   |             |             |             |
|---|-------------|-------------|-------------|
| H | -3.54317093 | -7.07362795 | -0.59621698 |
| C | 4.93347788  | 0.54956102  | -3.52657199 |
| C | 4.89558983  | -0.74864602 | 3.51506495  |
| C | -4.93386078 | -0.55165702 | -3.52545691 |
| C | 5.08703423  | 1.85537302  | -4.00003910 |
| C | 5.00412989  | -2.06319094 | 3.97662091  |
| C | -5.08711815 | -1.85845602 | -3.99632001 |
| H | 4.23690414  | 2.39034390  | -4.43159819 |
| H | 4.13887310  | -2.56937289 | 4.41295099  |
| H | -4.23689890 | -2.39404511 | -4.42694712 |
| C | 6.31794405  | 2.50304604  | -3.91212392 |
| C | 6.20850515  | -2.75635409 | 3.86981606  |
| C | -6.31780577 | -2.50632310 | -3.90694308 |
| H | 6.40204287  | 3.52191305  | -4.28797388 |
| H | 6.25784588  | -3.78072405 | 4.23670101  |
| H | -6.40160179 | -3.52599311 | -4.28066111 |
| C | 7.41594696  | 1.84926701  | -3.33522797 |
| C | 7.32406902  | -2.14031291 | 3.28520393  |
| C | -7.41590881 | -1.85177600 | -3.33109999 |
| C | 8.84817123  | 3.71801901  | -3.59852505 |
| C | 8.68568707  | -4.06563377 | 3.51371193  |
| C | -8.84744167 | -3.72165799 | -3.59014893 |
| C | 7.26614189  | 0.53067100  | -2.86624503 |
| C | 7.21989584  | -0.81311500 | 2.82845402  |
| C | -7.26643085 | -0.53219599 | -2.86480904 |
| H | 8.12688828  | 0.02391300  | -2.42548203 |
| H | 8.09405327  | -0.33569500 | 2.38138199  |
| H | -8.12724686 | -0.02483100 | -2.42487788 |
| C | 6.04082203  | -0.10241600 | -2.95451808 |
| C | 6.02066517  | -0.13463201 | 2.93561506  |
| C | -6.04132700 | 0.10111100  | -2.95458102 |
| H | 5.93905592  | -1.11835504 | -2.56922603 |
| H | 5.95270777  | 0.88721102  | 2.55823898  |
| H | -5.93983698 | 1.11785495  | -2.57140708 |
| C | 2.26265693  | 0.56247097  | -4.68781424 |
| C | 2.23406506  | -0.66405302 | 4.69947100  |
| C | -2.26380992 | -0.56565303 | -4.68816614 |
| C | 2.58693004  | 0.53679901  | -6.05669594 |
| C | 2.57107806  | -0.66078401 | 6.06550312  |
| C | -2.58892703 | -0.54168898 | -6.05687189 |
| H | 3.50827408  | 0.05535200  | -6.39499617 |
| H | 3.51645303  | -0.22394300 | 6.39800882  |
| H | -3.51057696 | -0.06086100 | -6.39521599 |
| C | 1.74688995  | 1.11155701  | -6.99376202 |
| C | 1.71366096  | -1.20159900 | 7.00713491  |
| C | -1.74938905 | -1.11751699 | -6.99374390 |
| H | 1.97875798  | 1.08463395  | -8.06017208 |
| H | 1.95610404  | -1.19161904 | 8.07150936  |
| H | -1.98196495 | -1.09197903 | -8.06003380 |
| C | 0.55360800  | 1.73793101  | -6.58570623 |
| C | 0.48883101  | -1.76931906 | 6.60674000  |
| C | -0.55580801 | -1.74328899 | -6.58564901 |
| C | -1.39342904 | 2.92850089  | -7.21205807 |
| C | -1.51220000 | -2.85974693 | 7.24529791  |

|   |             |             |             |
|---|-------------|-------------|-------------|
| C | 1.39035404  | -2.93553209 | -7.21155405 |
| C | 0.22993100  | 1.78210497  | -5.22485209 |
| C | 0.15187600  | -1.79138994 | 5.24862003  |
| C | -0.23127100 | -1.78571999 | -5.22494698 |
| H | -0.69336700 | 2.24951291  | -4.88503885 |
| H | -0.79458898 | -2.21424389 | 4.91447401  |
| H | 0.69221902  | -2.25271392 | -4.88510323 |
| C | 1.07885599  | 1.18937898  | -4.29371023 |
| C | 1.01954401  | -1.23435497 | 4.31281710  |
| C | -1.07967496 | -1.19193006 | -4.29403305 |
| H | 0.79779500  | 1.20488703  | -3.23560691 |
| H | 0.72912502  | -1.23233497 | 3.25710297  |
| H | -0.79800999 | -1.20619595 | -3.23607397 |
| C | 3.57790494  | -1.96473503 | -4.04606104 |
| C | 3.63961911  | 1.81364298  | 4.05196619  |
| C | -3.57866693 | 1.96241701  | -4.04747486 |
| C | 4.54338598  | -2.28400707 | -5.00687599 |
| C | 4.61883497  | 2.09356403  | 5.01117992  |
| C | -4.54422283 | 2.28082800  | -5.00852394 |
| H | 5.21700478  | -1.50952399 | -5.38419008 |
| H | 5.26132822  | 1.29243004  | 5.38715410  |
| H | -5.21734524 | 1.50585699  | -5.38570976 |
| C | 4.68052197  | -3.58596110 | -5.48590899 |
| C | 4.80982304  | 3.38892293  | 5.48953295  |
| C | -4.68218994 | 3.58256412  | -5.48786116 |
| H | 5.44637012  | -3.80082393 | -6.23176003 |
| H | 5.58515120  | 3.57262897  | 6.23391008  |
| H | -5.44803715 | 3.79669499  | -6.23392105 |
| C | 3.83803391  | -4.59923315 | -5.00239515 |
| C | 4.00845718  | 4.43557787  | 5.00705910  |
| C | -3.84043407 | 4.59653902  | -5.00448799 |
| C | 4.83454990  | -6.27856588 | -6.35243416 |
| C | 5.07299995  | 6.07325602  | 6.35663319  |
| C | -4.83816385 | 6.27483702  | -6.35492182 |
| C | 2.87225890  | -4.28725719 | -4.03038120 |
| C | 3.02977705  | 4.16314077  | 4.03609419  |
| C | -2.87436891 | 4.28537798  | -4.03251314 |
| H | 2.24514508  | -5.09376717 | -3.64451504 |
| H | 2.43579698  | 4.99453115  | 3.65059996  |
| H | -2.24767804 | 5.09234190  | -3.64689398 |
| C | 2.75600100  | -2.99313998 | -3.55349898 |
| C | 2.86011291  | 2.87467408  | 3.55977011  |
| C | -2.75739002 | 2.99146605  | -3.55523491 |
| H | 2.02476192  | -2.77148104 | -2.76886010 |
| H | 2.11929989  | 2.68292093  | 2.77623510  |
| H | -2.02603197 | 2.77047205  | -2.77051997 |
| H | -8.19209671 | -4.42707682 | -3.05018497 |
| H | -8.69205666 | -3.84007192 | -4.67603111 |
| H | -9.89305782 | -3.95160890 | -3.35339189 |
| H | 1.84646904  | -3.26403999 | -8.15303326 |
| H | 2.08956790  | -2.26592994 | -6.68379211 |
| H | 1.19973600  | -3.81762004 | -6.57588100 |
| H | -4.68866205 | 5.75112295  | -7.31450701 |
| H | -5.87027788 | 6.10134888  | -6.00522423 |

|   |             |             |             |
|---|-------------|-------------|-------------|
| H | -4.69109011 | 7.35034180  | -6.50899601 |
| H | -9.37618637 | 2.81075692  | -3.25947499 |
| H | -8.73544884 | 4.41480684  | -2.79036593 |
| H | -7.77546597 | 3.33991790  | -3.86816096 |
| H | -1.65697598 | 5.67779398  | 7.10116720  |
| H | -3.08735394 | 5.60152721  | 8.17501736  |
| H | -2.58365893 | 4.14570999  | 7.25612593  |
| H | 0.68464398  | 8.38860703  | -3.82625008 |
| H | 1.31072497  | 9.92137146  | -3.14195204 |
| H | 1.83343399  | 8.35393333  | -2.44493508 |
| H | -0.30623999 | 8.39316654  | 3.85352707  |
| H | -0.85172999 | 9.96422482  | 3.18700290  |
| H | -1.45452905 | 8.43412209  | 2.47216511  |
| H | 9.49804306  | 2.39284897  | 3.24022603  |
| H | 8.91139889  | 4.02599096  | 2.80166602  |
| H | 7.91520691  | 2.96313000  | 3.85833597  |
| H | 1.90520704  | 5.60605192  | -7.10135889 |
| H | 3.33343005  | 5.47165012  | -8.17234993 |
| H | 2.77023411  | 4.03795099  | -7.25319290 |
| H | -8.53695774 | 4.19108295  | 4.59405518  |
| H | -7.99746895 | 4.74315023  | 2.96851802  |
| H | -9.71856785 | 4.33618402  | 3.25728798  |
| H | -4.90501022 | -5.55037308 | 7.31839895  |
| H | -6.09773302 | -5.85799789 | 6.00844622  |
| H | -4.96753407 | -7.14995193 | 6.51599407  |
| H | 1.97303402  | 3.17360592  | 8.18917465  |
| H | 2.17507505  | 2.15204906  | 6.72967386  |
| H | 1.37559795  | 3.75100589  | 6.60120821  |
| H | 1.65748799  | -5.67763615 | 7.10140085  |
| H | 3.08731008  | -5.60224724 | 8.17607594  |
| H | 2.58407402  | -4.14568806 | 7.25808811  |
| H | -0.68385601 | -8.38994503 | -3.82331896 |
| H | -1.30936503 | -9.92284012 | -3.13884497 |
| H | -1.83297503 | -8.35546303 | -2.44227004 |
| H | 9.37477779  | -2.80592895 | -3.26092005 |
| H | 8.73465061  | -4.41073513 | -2.79365706 |
| H | 7.77372599  | -3.33450103 | -3.86928511 |
| H | -1.90562701 | -5.60523415 | -7.09988117 |
| H | -2.77252603 | -4.03808594 | -7.25078201 |
| H | -3.33457589 | -5.47216320 | -8.17006397 |
| H | -9.49990940 | -2.39720106 | 3.24063492  |
| H | -7.91759491 | -2.96806908 | 3.85954809  |
| H | -8.91290855 | -4.02993202 | 2.80102396  |
| H | 0.30959100  | -8.39159584 | 3.85518503  |
| H | 1.45719397  | -8.43318081 | 2.47323108  |
| H | 0.85445499  | -9.96297741 | 3.18898797  |
| H | 8.69239044  | 3.83430696  | -4.68459082 |
| H | 9.89397144  | 3.94795799  | -3.36258507 |
| H | 8.19337845  | 4.42482185  | -3.05971599 |
| H | 4.68540096  | -5.75530815 | -7.31232405 |
| H | 4.68694305  | -7.35407209 | -6.50599289 |
| H | 5.86670494  | -6.10537291 | -6.00271606 |
| H | -1.85024405 | 3.25552607  | -8.15371037 |
| H | -1.20314002 | 3.81150889  | -6.57756710 |

|   |             |             |             |
|---|-------------|-------------|-------------|
| H | -2.09187102 | 2.25900507  | -6.68314219 |
| H | 4.90430117  | 5.55486393  | 7.31591702  |
| H | 4.96758890  | 7.15349388  | 6.51172400  |
| H | 6.09732294  | 5.86047983  | 6.00575495  |
| H | 8.53800011  | -4.18698597 | 4.60036898  |
| H | 9.71903038  | -4.33343506 | 3.26324105  |
| H | 7.99783707  | -4.74095583 | 2.97568607  |
| H | -1.97617102 | -3.16889811 | 8.18949127  |
| H | -1.37814200 | -3.74656391 | 6.60185480  |
| H | -2.17780399 | -2.14765000 | 6.72968817  |
| O | -8.62565041 | -2.39551091 | -3.17587495 |
| O | -3.89075303 | 5.87490177  | -5.39242601 |
| O | 0.19505000  | -2.27550507 | -7.55537319 |
| O | 4.10997105  | 5.71094990  | 5.39470911  |
| O | 8.51036358  | -2.72864199 | 3.11236405  |
| O | -0.27833101 | -2.26984811 | 7.58054209  |
| O | -0.19779900 | 2.26894593  | -7.55565214 |
| O | 8.62595367  | 2.39278793  | -3.18154502 |
| O | 3.88722205  | -5.87766123 | -5.39026785 |
| O | -3.78724098 | -5.53030777 | -6.20715523 |
| O | -0.49546000 | -9.00979233 | 2.03688598  |
| O | -8.02942085 | -2.39395809 | 1.86199498  |
| O | 0.08705100  | -9.02657700 | -1.99649000 |
| O | 7.90664387  | -2.73086405 | -1.88182902 |
| O | 3.54330397  | -5.67414904 | 6.21442413  |
| O | 8.02874660  | 2.39091611  | 1.86032605  |
| O | 3.78719997  | 5.52872419  | -6.20966721 |
| O | 0.49789199  | 9.01083279  | 2.03467798  |
| O | -8.51017380 | 2.73104692  | 3.10768104  |
| O | 0.27531901  | 2.27459502  | 7.57982922  |
| O | -4.11036491 | -5.70830679 | 5.39747190  |
| O | -0.08638500 | 9.02601147  | -1.99976301 |
| O | -7.90712881 | 2.73348999  | -1.88149595 |
| O | -3.54234290 | 5.67501307  | 6.21319485  |

$C_4 Au_9(PR_3)_8^{3+}$ , R=PhOMe

|    |             |             |             |
|----|-------------|-------------|-------------|
| Au | -0.00406000 | -0.02355800 | -0.02570700 |
| Au | -1.42250097 | 2.01636291  | -1.05653596 |
| Au | -2.40604305 | 0.45452601  | 1.12337995  |
| Au | 1.24142897  | -2.06967592 | -1.28854203 |
| Au | 2.35034108  | -0.78296202 | 1.02252305  |
| Au | -2.10916591 | -1.41152501 | -0.96900302 |
| Au | -0.41965300 | -2.48748207 | 1.00882900  |
| Au | 2.14611697  | 1.37402403  | -0.84377599 |
| Au | 0.39274999  | 2.36928701  | 1.12654805  |
| P  | -2.28660607 | 3.53674698  | -2.56727004 |
| P  | -4.17852211 | 0.52942902  | 2.61076498  |
| P  | 2.03512812  | -3.57017708 | -2.86625004 |
| P  | 4.13680792  | -0.93047601 | 2.48925900  |
| P  | -3.50058007 | -2.39683509 | -2.53058410 |
| P  | -0.34852001 | -4.02785587 | 2.72650909  |
| P  | 3.60263109  | 2.34355497  | -2.36602807 |

|   |             |             |             |
|---|-------------|-------------|-------------|
| P | 0.44927499  | 4.05504084  | 2.70699310  |
| C | -3.64356995 | 2.86888599  | -3.56385112 |
| C | -4.43269682 | 1.84304202  | -3.03688502 |
| H | -4.21540785 | 1.45261705  | -2.03855395 |
| C | -5.47447300 | 1.28508699  | -3.76973391 |
| H | -6.05833578 | 0.47655800  | -3.33259511 |
| C | -5.72149801 | 1.73313797  | -5.07425594 |
| O | -6.66575813 | 1.22561502  | -5.87182522 |
| C | -4.93597221 | 2.76881194  | -5.61163712 |
| H | -5.14815903 | 3.10234499  | -6.62907600 |
| C | -3.91512489 | 3.33130503  | -4.86329699 |
| H | -3.30935001 | 4.13100004  | -5.29782391 |
| C | -1.05422497 | 4.15678883  | -3.73532200 |
| C | -0.09768700 | 3.26120710  | -4.22435188 |
| H | -0.05520700 | 2.24336290  | -3.82543898 |
| C | 0.81924701  | 3.64417505  | -5.19638205 |
| H | 1.55828297  | 2.92237592  | -5.54395580 |
| C | 0.80634600  | 4.96237993  | -5.67605019 |
| O | 1.65670800  | 5.43503189  | -6.59172916 |
| C | -0.13808800 | 5.87489319  | -5.17356920 |
| H | -0.11606400 | 6.89804077  | -5.55340910 |
| C | -1.06120598 | 5.47464609  | -4.22086000 |
| H | -1.79334497 | 6.19359922  | -3.84294796 |
| C | -2.94968200 | 4.95642805  | -1.65112495 |
| C | -4.32235718 | 5.24494123  | -1.63081098 |
| H | -4.99860191 | 4.70428324  | -2.29822493 |
| C | -4.82867813 | 6.20520687  | -0.76837099 |
| H | -5.89599991 | 6.43313980  | -0.73342800 |
| C | -3.97168589 | 6.91007185  | 0.09118900  |
| O | -4.55757189 | 7.75580120  | 0.94673002  |
| C | -2.58955097 | 6.67673206  | 0.02604200  |
| H | -1.89967895 | 7.22367001  | 0.66671401  |
| C | -2.09422994 | 5.69258690  | -0.82173699 |
| H | -1.02093601 | 5.47688103  | -0.81239700 |
| C | -5.62375021 | 1.29289603  | 1.81008697  |
| C | -6.93788004 | 1.02928996  | 2.23553610  |
| H | -7.11749506 | 0.34332699  | 3.06790090  |
| C | -8.01975536 | 1.60378397  | 1.58811104  |
| H | -9.04419422 | 1.40749002  | 1.91054201  |
| C | -7.82047796 | 2.44017792  | 0.47457901  |
| O | -8.92388916 | 2.89378691  | -0.12984601 |
| C | -6.51404190 | 2.71803689  | 0.04849700  |
| H | -6.32397699 | 3.35821009  | -0.81135601 |
| C | -5.43465805 | 2.14484406  | 0.71630698  |
| H | -4.42129707 | 2.35684299  | 0.35888901  |
| C | -4.72833109 | -1.13864195 | 3.07217908  |
| C | -4.61737108 | -1.65015602 | 4.36573696  |
| H | -4.24944115 | -1.01629305 | 5.17502117  |
| C | -4.95938206 | -2.97357106 | 4.64704800  |
| H | -4.84596014 | -3.34372091 | 5.66578817  |
| C | -5.43390512 | -3.80361199 | 3.62349796  |
| O | -5.75955486 | -5.09425306 | 3.77637100  |
| C | -5.56754208 | -3.28647995 | 2.32212710  |
| H | -5.95031786 | -3.93711495 | 1.53299403  |

|   |             |             |             |
|---|-------------|-------------|-------------|
| C | -5.20433807 | -1.98100805 | 2.05133295  |
| H | -5.29665518 | -1.61208200 | 1.02836204  |
| C | -3.82595110 | 1.42600703  | 4.14393711  |
| C | -4.83357191 | 1.81824398  | 5.04316998  |
| H | -5.88024616 | 1.57766700  | 4.84087896  |
| C | -4.51832724 | 2.52735806  | 6.19016409  |
| H | -5.29083586 | 2.85043001  | 6.89031410  |
| C | -3.18087196 | 2.86207795  | 6.47295904  |
| O | -2.96553707 | 3.55035591  | 7.59786797  |
| C | -2.16951609 | 2.46922112  | 5.58754396  |
| H | -1.12686503 | 2.72892690  | 5.76769114  |
| C | -2.50283694 | 1.77012599  | 4.43211794  |
| H | -1.71042800 | 1.50456595  | 3.72529697  |
| C | 3.50644398  | -3.00207591 | -3.76123810 |
| C | 4.33069611  | -2.03571391 | -3.18058801 |
| H | 4.05353594  | -1.60751998 | -2.21264601 |
| C | 5.48089790  | -1.58902204 | -3.82308197 |
| H | 6.09331894  | -0.82094502 | -3.35359192 |
| C | 5.80546999  | -2.08811212 | -5.09138918 |
| O | 6.86147118  | -1.68506503 | -5.80533504 |
| C | 4.98168182  | -3.06025505 | -5.68467712 |
| H | 5.25142622  | -3.43271995 | -6.67443323 |
| C | 3.85186100  | -3.51349497 | -5.02446985 |
| H | 3.22166896  | -4.26796579 | -5.50218487 |
| C | 0.85514301  | -4.06065416 | -4.14525414 |
| C | 0.01226900  | -3.08369994 | -4.68132210 |
| H | -0.02438200 | -2.09239697 | -4.22195911 |
| C | -0.79720098 | -3.35092306 | -5.78091383 |
| H | -1.45355999 | -2.56735396 | -6.16106987 |
| C | -0.79033703 | -4.63532877 | -6.34379005 |
| O | -1.55955398 | -5.01114511 | -7.37141418 |
| C | 0.03609800  | -5.63068485 | -5.79428291 |
| H | 0.01084100  | -6.62695217 | -6.23962498 |
| C | 0.84952700  | -5.34714603 | -4.71017313 |
| H | 1.48698199  | -6.13213110 | -4.29439783 |
| C | 2.54262710  | -5.06878519 | -1.97407305 |
| C | 3.88937902  | -5.45645094 | -1.90097499 |
| H | 4.63577604  | -4.94440699 | -2.51327395 |
| C | 4.28461218  | -6.47643423 | -1.05026305 |
| H | 5.33056211  | -6.78063822 | -0.97512501 |
| C | 3.34215212  | -7.13079214 | -0.24224900 |
| O | 3.83178210  | -8.02895832 | 0.62014800  |
| C | 1.98410594  | -6.79480219 | -0.35908201 |
| H | 1.22672200  | -7.29825115 | 0.24113300  |
| C | 1.59692204  | -5.76447296 | -1.21017599 |
| H | 0.53947598  | -5.48261881 | -1.25491703 |
| C | 5.56323481  | -1.71039498 | 1.67355895  |
| C | 6.87878704  | -1.54740596 | 2.14294791  |
| H | 7.07227612  | -0.96024698 | 3.04469490  |
| C | 7.94834518  | -2.09481096 | 1.45330703  |
| H | 8.97316265  | -1.98291695 | 1.81275403  |
| C | 7.73901606  | -2.78870106 | 0.24681100  |
| O | 8.83561134  | -3.21992803 | -0.38506800 |
| C | 6.43167114  | -2.95543909 | -0.23227300 |

|   |             |             |             |
|---|-------------|-------------|-------------|
| H | 6.23300409  | -3.47790194 | -1.16761899 |
| C | 5.36422777  | -2.41901803 | 0.48413599  |
| H | 4.34930277  | -2.54559493 | 0.09446300  |
| C | 4.69153976  | 0.75865102  | 2.87414408  |
| C | 4.73705006  | 1.29276502  | 4.16211891  |
| H | 4.48821402  | 0.66884500  | 5.02314520  |
| C | 5.08289003  | 2.62866807  | 4.37312603  |
| H | 5.09152794  | 3.01829004  | 5.39104319  |
| C | 5.39970493  | 3.44841790  | 3.28238392  |
| O | 5.70832205  | 4.74895382  | 3.36668301  |
| C | 5.37720823  | 2.90776992  | 1.98394001  |
| H | 5.64316702  | 3.54622698  | 1.13880098  |
| C | 5.01253080  | 1.59039795  | 1.78782296  |
| H | 4.97664022  | 1.20027494  | 0.76981902  |
| C | 3.79529691  | -1.70149803 | 4.09337091  |
| C | 4.79767179  | -2.17593908 | 4.95781517  |
| H | 5.83949184  | -2.21227098 | 4.63222504  |
| C | 4.47957277  | -2.61505103 | 6.23232889  |
| H | 5.24733305  | -2.99345803 | 6.90962601  |
| C | 3.14603806  | -2.59567189 | 6.67914581  |
| O | 2.92943192  | -3.02940512 | 7.92657518  |
| C | 2.13798690  | -2.14502907 | 5.81872797  |
| H | 1.09088898  | -2.15049195 | 6.12017918  |
| C | 2.47148108  | -1.70855701 | 4.53933191  |
| H | 1.67537296  | -1.37063801 | 3.86966491  |
| C | -3.08930707 | -4.15429497 | -2.69846106 |
| C | -2.64495206 | -4.81972122 | -1.54858303 |
| H | -2.56772900 | -4.28213501 | -0.59822601 |
| C | -2.27768207 | -6.16102314 | -1.58253706 |
| H | -1.93967700 | -6.63991690 | -0.66320300 |
| C | -2.34471011 | -6.86681604 | -2.79343009 |
| O | -1.99388504 | -8.14768791 | -2.93886590 |
| C | -2.79444194 | -6.20776796 | -3.95081401 |
| H | -2.82962799 | -6.76832724 | -4.88662291 |
| C | -3.15922904 | -4.87248278 | -3.90263200 |
| H | -3.47676110 | -4.37820816 | -4.82320023 |
| C | -3.32664609 | -1.55220103 | -4.13182020 |
| C | -2.33158302 | -0.57964998 | -4.27400684 |
| H | -1.65482295 | -0.37331101 | -3.43846202 |
| C | -2.19887090 | 0.16341700  | -5.44280481 |
| H | -1.42668104 | 0.93020302  | -5.50365400 |
| C | -3.09398699 | -0.04498600 | -6.50079393 |
| O | -3.07418394 | 0.63967198  | -7.64721680 |
| C | -4.10247183 | -1.01819897 | -6.36950016 |
| H | -4.80245590 | -1.14710104 | -7.19725180 |
| C | -4.21815491 | -1.75284803 | -5.20035410 |
| H | -5.03367996 | -2.47562504 | -5.10819578 |
| C | -5.26747417 | -2.27738690 | -2.13088298 |
| C | -6.22016001 | -3.20417690 | -2.58745193 |
| H | -5.90044022 | -4.09461117 | -3.13651991 |
| C | -7.56856203 | -3.00823998 | -2.33535600 |
| H | -8.32124424 | -3.71887398 | -2.68241596 |
| C | -8.00444412 | -1.88462603 | -1.60767102 |
| O | -9.32142353 | -1.77677405 | -1.42041099 |

|   |             |             |             |
|---|-------------|-------------|-------------|
| C | -7.05763292 | -0.96868002 | -1.12413597 |
| H | -7.35557604 | -0.10344400 | -0.53198498 |
| C | -5.70670223 | -1.17493200 | -1.39218605 |
| H | -4.97527885 | -0.45673001 | -1.00796902 |
| C | -1.31180203 | -5.53174496 | 2.41134810  |
| C | -0.72293198 | -6.79935312 | 2.29857707  |
| H | 0.34583199  | -6.91863298 | 2.49036288  |
| C | -1.48858500 | -7.90163279 | 1.94657695  |
| H | -1.04681504 | -8.89620876 | 1.85600102  |
| C | -2.86633492 | -7.76284409 | 1.70812798  |
| O | -3.51423407 | -8.87035942 | 1.32754099  |
| C | -3.46901393 | -6.50337982 | 1.85556805  |
| H | -4.54035091 | -6.36676121 | 1.71189904  |
| C | -2.68729711 | -5.40288401 | 2.18919110  |
| H | -3.16343188 | -4.42118692 | 2.26857901  |
| C | 1.35771596  | -4.55505896 | 3.04358506  |
| C | 1.77916002  | -5.05726624 | 4.28740978  |
| H | 1.07478094  | -5.13708591 | 5.11804008  |
| C | 3.09607196  | -5.42847586 | 4.49126577  |
| H | 3.43909693  | -5.79895401 | 5.45887995  |
| C | 4.03480577  | -5.31605482 | 3.44959998  |
| O | 5.28859711  | -5.67160892 | 3.73898411  |
| C | 3.61967707  | -4.84059906 | 2.19965005  |
| H | 4.31898785  | -4.75973177 | 1.36995399  |
| C | 2.29680204  | -4.45342779 | 2.01239800  |
| H | 1.99651003  | -4.06346083 | 1.03650403  |
| C | -0.99124599 | -3.32029605 | 4.27247810  |
| C | -1.37951005 | -4.12883520 | 5.35509109  |
| H | -1.38602698 | -5.21748686 | 5.24853277  |
| C | -1.76884997 | -3.56201005 | 6.55835819  |
| H | -2.07307291 | -4.17829895 | 7.40704584  |
| C | -1.78674400 | -2.16367102 | 6.71051311  |
| O | -2.16516209 | -1.70104206 | 7.90747118  |
| C | -1.43280101 | -1.34811103 | 5.62690687  |
| H | -1.47505701 | -0.26234800 | 5.70556593  |
| C | -1.05107403 | -1.93133903 | 4.42096615  |
| H | -0.80053699 | -1.28435099 | 3.57371593  |
| C | 3.23820210  | 4.08853483  | -2.68762493 |
| C | 2.27945209  | 4.73700190  | -1.90362501 |
| H | 1.79019797  | 4.19808817  | -1.08677697 |
| C | 1.92448997  | 6.06105185  | -2.14445710 |
| H | 1.17811298  | 6.53522015  | -1.50823295 |
| C | 2.52638006  | 6.76274109  | -3.19633698 |
| O | 2.23701406  | 8.02317715  | -3.52710605 |
| C | 3.50220108  | 6.12348890  | -3.98392606 |
| H | 3.95433998  | 6.68796206  | -4.80106020 |
| C | 3.84601808  | 4.80728197  | -3.73440289 |
| H | 4.59472418  | 4.32987022  | -4.37106895 |
| C | 3.47796106  | 1.44676805  | -3.94749308 |
| C | 2.37823606  | 0.61477399  | -4.17987394 |
| H | 1.61255205  | 0.50105202  | -3.40556788 |
| C | 2.24891210  | -0.10509900 | -5.36407804 |
| H | 1.39063597  | -0.76156902 | -5.50114012 |
| C | 3.24829507  | -0.01810800 | -6.34233713 |



|   |             |             |             |
|---|-------------|-------------|-------------|
| O | 3.23752308  | -0.70056701 | -7.49018288 |
| C | 4.35788918  | 0.81910300  | -6.12135220 |
| H | 5.13249302  | 0.85803998  | -6.88977385 |
| C | 4.47075176  | 1.53267503  | -4.93954420 |
| H | 5.36365986  | 2.14126205  | -4.76946878 |
| C | 5.35742807  | 2.21216393  | -1.90908206 |
| C | 6.26680803  | 3.28137398  | -1.93448496 |
| H | 5.93311405  | 4.28085804  | -2.22266889 |
| C | 7.59574604  | 3.08485699  | -1.58896303 |
| H | 8.31388569  | 3.90684104  | -1.60757804 |
| C | 8.05513096  | 1.81467104  | -1.20021701 |
| O | 9.35061836  | 1.72112894  | -0.89451301 |
| C | 7.14735079  | 0.74437702  | -1.14586198 |
| H | 7.45594597  | -0.24462500 | -0.80676299 |
| C | 5.81862688  | 0.95634401  | -1.49704099 |
| H | 5.11491585  | 0.12248300  | -1.41982496 |
| C | 1.39233804  | 5.48264694  | 2.10932899  |
| C | 0.80120301  | 6.73224688  | 1.87071097  |
| H | -0.22719701 | 6.91660976  | 2.18976307  |
| C | 1.51038098  | 7.73337317  | 1.22409701  |
| H | 1.06192303  | 8.70937920  | 1.02745295  |
| C | 2.82841206  | 7.50610209  | 0.79546797  |
| O | 3.40046692  | 8.49700642  | 0.10060900  |
| C | 3.44584107  | 6.27938604  | 1.08322597  |
| H | 4.47810984  | 6.08400297  | 0.79406703  |
| C | 2.72162008  | 5.27917910  | 1.72032106  |
| H | 3.19808888  | 4.31000805  | 1.89241898  |
| C | -1.20927000 | 4.65610409  | 3.13096094  |
| C | -1.44701898 | 5.47298813  | 4.25153112  |
| H | -0.61646903 | 5.80198097  | 4.88131714  |
| C | -2.73358893 | 5.85719013  | 4.58658791  |
| H | -2.93486190 | 6.47872114  | 5.46132517  |
| C | -3.82718492 | 5.43741798  | 3.80369496  |
| O | -5.03283978 | 5.84783411  | 4.20139122  |
| C | -3.59774494 | 4.64362288  | 2.67394710  |
| H | -4.42184687 | 4.31357813  | 2.04320502  |
| C | -2.30032301 | 4.25818777  | 2.35397911  |
| H | -2.14081812 | 3.62043905  | 1.47969103  |
| C | 1.21977699  | 3.48946595  | 4.25254488  |
| C | 1.76672101  | 4.37811708  | 5.19447994  |
| H | 1.81051695  | 5.44884205  | 4.97469902  |
| C | 2.27606297  | 3.90914297  | 6.39489985  |
| H | 2.70994902  | 4.58639479  | 7.13363409  |
| C | 2.26285791  | 2.53205705  | 6.68369722  |
| O | 2.80332208  | 2.16651297  | 7.85110092  |
| C | 1.72555304  | 1.63678896  | 5.74880791  |
| H | 1.73006296  | 0.56224000  | 5.93059301  |
| C | 1.22419596  | 2.12129092  | 4.54364014  |
| H | 0.84059602  | 1.40997899  | 3.80497003  |
| C | -7.53090811 | 0.23541100  | -5.36977816 |
| H | -6.98141289 | -0.67307198 | -5.06995678 |
| H | -8.10748959 | 0.60308403  | -4.50331402 |
| H | -8.22499084 | -0.01294500 | -6.18137121 |
| C | 2.56641603  | 4.55575085  | -7.20677710 |

|   |              |             |             |
|---|--------------|-------------|-------------|
| H | 3.26271892   | 4.11129522  | -6.47596979 |
| H | 2.04422307   | 3.74221706  | -7.73910379 |
| H | 3.13393903   | 5.15131712  | -7.93173504 |
| C | -3.76331210  | 8.52136230  | 1.82326102  |
| H | -3.17208290  | 7.87851810  | 2.49785399  |
| H | -3.08809590  | 9.19493675  | 1.26902699  |
| H | -4.45567989  | 9.12453938  | 2.42220998  |
| C | -8.80051327  | 3.74098206  | -1.24871099 |
| H | -8.27190781  | 3.24084806  | -2.07898307 |
| H | -9.82021523  | 3.98756409  | -1.56693900 |
| H | -8.27048969  | 4.67385483  | -0.99117500 |
| C | -5.58556795  | -5.70554686 | 5.03266621  |
| H | -4.53079605  | -5.66566181 | 5.35504198  |
| H | -6.22142076  | -5.23836422 | 5.80317116  |
| H | -5.88473701  | -6.75390816 | 4.91421318  |
| C | -1.65009904  | 3.91138196  | 7.94431210  |
| H | -1.18952000  | 4.55495119  | 7.17630386  |
| H | -1.71708000  | 4.46593618  | 8.88771820  |
| H | -1.00933003  | 3.02435303  | 8.09254932  |
| C | 7.75390816   | -0.75131500 | -5.24892282 |
| H | 8.21908855   | -1.13531697 | -4.32385921 |
| H | 8.53635502   | -0.58198500 | -5.99810505 |
| H | 7.25447798   | 0.20606799  | -5.02249622 |
| C | 2.97235799   | -8.63144875 | 1.55713201  |
| H | 2.51650190   | -7.87427378 | 2.21920705  |
| H | 2.18012404   | -9.22184086 | 1.06606305  |
| H | 3.59217191   | -9.30527115 | 2.16030312  |
| C | -2.35890007  | -4.05506992 | -8.02503967 |
| H | -3.11762810  | -3.62407708 | -7.34980392 |
| H | -1.74999595  | -3.23365688 | -8.44051743 |
| H | -2.86234093  | -4.57839108 | -8.84654140 |
| C | 8.70217228   | -3.92921996 | -1.59464502 |
| H | 8.21224976   | -3.31713796 | -2.37222910 |
| H | 9.71752930   | -4.18262482 | -1.92138302 |
| H | 8.12760830   | -4.86090803 | -1.45550799 |
| C | 5.71991205   | 5.37585402  | 4.62688684  |
| H | 6.47881079   | 4.93279886  | 5.29358292  |
| H | 5.97248411   | 6.42808008  | 4.44962311  |
| H | 4.73112917   | 5.31784821  | 5.11293888  |
| C | 1.61108994   | -3.10508394 | 8.41131496  |
| H | 0.98883599   | -3.77874207 | 7.79762411  |
| H | 1.67524302   | -3.50156903 | 9.43148994  |
| H | 1.12502396   | -2.11387897 | 8.44210243  |
| C | -1.52674997  | -8.86812019 | -1.82342505 |
| H | -2.27829099  | -8.91469479 | -1.01673400 |
| H | -1.31825995  | -9.88517380 | -2.17637992 |
| H | -0.59554499  | -8.42925262 | -1.42353404 |
| C | -9.82672215  | -0.72345197 | -0.63495499 |
| H | -9.44411087  | -0.77651399 | 0.39839801  |
| H | -9.57595539  | 0.26576400  | -1.05517602 |
| H | -10.91679192 | -0.84006900 | -0.62212199 |
| C | -2.08947897  | 1.62672901  | -7.84181404 |
| H | -2.15802908  | 2.42338800  | -7.08200216 |
| H | -1.07353997  | 1.19448602  | -7.81641579 |

|   |             |             |             |
|---|-------------|-------------|-------------|
| H | -2.27121902 | 2.05628896  | -8.83406162 |
| C | -4.90249586 | -8.81307411 | 1.08852601  |
| H | -5.14031219 | -8.12288380 | 0.26107600  |
| H | -5.21186590 | -9.82768726 | 0.81143302  |
| H | -5.45463514 | -8.50283813 | 1.99149096  |
| C | -2.27764201 | -0.31121200 | 8.10459328  |
| H | -3.01306605 | 0.14097600  | 7.41764402  |
| H | -2.61496305 | -0.16819300 | 9.13789845  |
| H | -1.30732000 | 0.19856501  | 7.96687222  |
| C | 6.25791216  | -5.65242004 | 2.71612906  |
| H | 6.41181993  | -4.63331699 | 2.32109189  |
| H | 7.19209480  | -6.00773096 | 3.16704392  |
| H | 5.97472477  | -6.32715416 | 1.89014995  |
| C | 9.86963654  | 0.49416700  | -0.44162899 |
| H | 9.38955593  | 0.18019301  | 0.50017798  |
| H | 9.74390793  | -0.30858299 | -1.18871796 |
| H | 10.94007301 | 0.65377498  | -0.26655501 |
| C | 2.16243410  | -1.56619895 | -7.76535702 |
| H | 2.07067394  | -2.35731292 | -7.00222111 |
| H | 1.20620799  | -1.01686704 | -7.82552004 |
| H | 2.37304091  | -2.02445698 | -8.73892784 |
| C | 1.31912005  | 8.75001717  | -2.74242711 |
| H | 0.32301599  | 8.27426434  | -2.74091697 |
| H | 1.68284297  | 8.85568237  | -1.70681405 |
| H | 1.23939395  | 9.74300766  | -3.20061302 |
| C | 4.69303989  | 8.31513596  | -0.43116301 |
| H | 4.72172880  | 7.45768785  | -1.12589705 |
| H | 4.93325901  | 9.23226261  | -0.98189098 |
| H | 5.44108105  | 8.16937637  | 0.36588100  |
| C | 2.86111593  | 0.80142403  | 8.18890476  |
| H | 3.44994092  | 0.22165300  | 7.45758677  |
| H | 3.34696507  | 0.74172503  | 9.16981506  |
| H | 1.85168195  | 0.35892400  | 8.26000595  |
| C | -6.15955019 | 5.52161217  | 3.41917109  |
| H | -6.29616213 | 4.42921877  | 3.33944392  |
| H | -7.02701712 | 5.95574284  | 3.93017101  |
| H | -6.07743692 | 5.95782995  | 2.40919805  |

## References

1. J. W. Fagan, K. L. D. M. Weerawardene, A. Cirri, C. M. Aikens and C. J. Johnson, "Toward quantitative electronic structure in small gold nanoclusters," *J. Chem. Phys.* **155**, 014301 (2021).
2. A. Cirri, H. M. Hernández and C. J. Johnson, "High Precision Electronic Spectroscopy of Ligand-Protected Gold Nanoclusters: Effects of Composition, Environment, and Ligand Chemistry," *J. Phys. Chem. A* **124**, 1467–1479 (2020).
3. H.-R. C. Jaw and W. R. Mason, "Magnetic Circular Dichroism Spectra for the  $\text{Au}_9(\text{PPh}_3)_8^{3+}$  Ion," *Inorg. Chem.* **30**, 275-278 (1991).
4. W. R. Mason, "Electronic Absorption and MCD Spectra for  $\text{Pt}(\text{AuPPh}_3)_8^{2+}$  and  $\text{Au}(\text{AuPPh}_3)_8^{3+}$  Cluster Complexes in Poly(methyl methacrylate) Thin Films at 295 and 10 K," *Inorg. Chem.* **39**, 370-374 (2000).
5. J. M. L. Madrideojos, T. Harada, A. J. Falcinella, T. D. Small, V. B. Golovko, G. G. Andersson, G. F. Metha and T. W. Kee, "Optical Properties of the Atomically Precise  $\text{C}_4$  Core  $[\text{Au}_9(\text{PPh}_3)_8]^{3+}$  Cluster Probed by Transient Absorption Spectroscopy and Time-Dependent Density Functional Theory," *J. Phys. Chem. C* **125**, 2033–2044 (2021).
6. N. V. Karimova and C. M. Aikens, "Time Dependent Density Functional Theory Study of Magnetic Circular Dichroism Spectra of Gold Clusters  $\text{Au}_9(\text{PH}_3)_8^{3+}$  and  $\text{Au}_9(\text{PPh}_3)_8^{3+}$ ," *J. Phys. Chem. A* **120**, 9625-9635 (2016).
